# Supplementary material for: Relative Bioavailability of Trace Minerals in Production Animal Nutrition: A Review
Source: MDPI journal article supplement (doi:10.3390/ani12151981), 2022-08-04
Supplement: s1 [file s1]

## Relative bioavailability of trace minerals in production animal nutrition: A review

Laurann Byrne\* and Richard A. Murphy

Alltech Bioscience Centre, Summerhill Road, Dunboyne, Co. Meath, Ireland. A86 X006

\*Corresponding author

E-mail address: lbyrne@alltech.com (L. Byrne)

### Supplementary Data tables – S1 – S17

Notes on tables S1 – S17:

- Early data is based on previously published tables by Ammerman et al. [1].
- Data from tables published by De Groote et al. [2] have also been incorporated and are identified by an asterix (\*). Some of this data include earlier Ammerman data but were calculated using different metrics, causing RBV to vary in some cases.
- The remaining data has been taken directly from peer-reviewed publications as per the reference column.
- Source names and spelling are those used by the authors in the text of the respective papers and may differ between publications.
- Chemical formula for a compound is given only if provided by the author.
- The most recent database search was carried out in May 2022.
- Tables contain data for production animals only.

### COPPER

#### Individual species tables for relative bioavailability of supplemental copper sources

**Table S1. Cattle**

| Source | RV, % | Standard | Response<br>Criterion | Method<br>Calculation | Type<br>diet | Added<br>level,<br>mg/kg | Reference |
|--------|-------|----------|-----------------------|-----------------------|--------------|--------------------------|-----------|
|        |       |          |                       |                       |              |                          |           |

|                                                                                |                     |                                      |                  |    |                |                     |                                   |
|--------------------------------------------------------------------------------|---------------------|--------------------------------------|------------------|----|----------------|---------------------|-----------------------------------|
| Copper carbonate                                                               | 86*                 | Cupric sulfate                       | Liv Cu           |    |                | 10*,<br>50 mg / day | Ward et al.,<br>1996 [3]          |
| Copper chloride                                                                | 98*                 | Cupric sulfate                       | Liv Cu           |    |                | 20                  | Engle and<br>Spears, 2000<br>[4]  |
| Copper chloride<br>basic<br>Diet: (high S (0.25 %)<br>and Mo (6.8 mg/kg<br>DM) | 112                 | CuSO <sub>4</sub> .5H <sub>2</sub> O | Liv Cu           | SR | N -5<br>mg/kg  | 5, 10               | VanValin et al.,<br>2019 [5]      |
| Copper chloride<br>basic<br>Diet: (high S (0.25 %)<br>and Mo (6.8 mg/kg<br>DM) | 102                 | CuSO <sub>4</sub> .5H <sub>2</sub> O | Pla Cu           | SR | N -5<br>mg/kg  | 5, 10               | VanValin et al.,<br>2019 [5]      |
| Copper citrate                                                                 | 101*                | Cupric sulfate                       | Liv Cu           |    |                | 20                  | Engle and<br>Spears, 2000<br>[4]  |
| Copper glycinate<br>Phase 1 (2mg Mo)<br>Phase 2 (6 mg Mo)                      | 140,<br>144         | Copper sulfate<br>FG                 | Pla Cu           | SR | N - 8<br>mg/kg | 5, 10               | Hansen et al.,<br>2008 [6]        |
| Copper glycinate<br>Phase 1 (2mg Mo)<br>Phase 2 (6 mg Mo)                      | 131,<br>150         | Copper sulfate<br>FG                 | Liv Cu           | SR | N - 8<br>mg/kg | 5, 10               | Hansen et al.,<br>2008 [6]        |
| Copper glycinate<br>Phase 1 (2mg Mo)<br>Phase 2 (6 mg Mo)                      | 140,<br>157         | Copper sulfate<br>FG                 | Cer              | SR | N - 8<br>mg/kg | 5, 10               | Hansen et al.,<br>2008 [6]        |
| Copper-lysine                                                                  | 100,<br>102*<br>112 | Cupric sulfate                       | Pla Cu           | TP | N -5<br>mg/kg  | 30 mg/day           | Kegley and<br>Spears, 1994<br>[7] |
| Copper lysine                                                                  | 104*                | Cupric sulfate                       | Liv Cu           |    |                | 15 – 30             | Chase et al.,<br>2000 [8]         |
| Copper lysine <sup>1</sup>                                                     | 153*                | Cupric sulfate                       | Apparent<br>abs. |    |                | 8                   | Nockels et al.,<br>1993 [9]       |
| Copper lysine                                                                  | 89*                 | Cupric sulfate                       | Pla Cu           |    | N              | 5                   | Ward et al.,<br>1993 [10]         |
| Copper lysine<br>Diet: (high S (0.25 %)<br>and Mo (6.8 mg/kg<br>DM)            | 103                 | CuSO <sub>4</sub> .5H <sub>2</sub> O | Liv Cu           | SR | N -5<br>mg/kg  | 5, 10               | VanValin et al.,<br>2019 [5]      |
| Copper lysine                                                                  | 101                 | CuSO <sub>4</sub> .5H <sub>2</sub> O | Pla Cu           | SR | N -5<br>mg/kg  | 5, 10               | VanValin et al.,<br>2019 [5]      |

|                                                                    |                  |                                         |                     |    |                             |                 |                              |
|--------------------------------------------------------------------|------------------|-----------------------------------------|---------------------|----|-----------------------------|-----------------|------------------------------|
| Diet: (high S (0.25 %) and Mo (6.8 mg/kg DM)                       |                  |                                         |                     |    |                             |                 |                              |
| Copper proteinate                                                  | 112              | Cupric sulfate                          | Pla Cu <sup>2</sup> | MR | N – 5 mg/kg                 | 14              | Kincaid et al., 1986 [11]    |
| Copper proteinate                                                  | 147, 107*        | Cupric sulfate                          | Liv Cu <sup>2</sup> | MR | N – 5 mg/kg                 | 14, 18*         | Kincaid et al., 1986 [11]    |
| Copper proteinate                                                  | 102 (110, 82)    | Cupric sulfate                          | Liv Cu              | MR | N                           | 10              | Wittenberg et al., 1990 [12] |
| Copper proteinate                                                  | 102*             | Cupric sulfate                          | Liv Cu, Pla         |    |                             | 5 – 80          | Du et al., 1996 [13]         |
| Copper proteinate                                                  | 103*             | Cupric sulfate                          | Liv Cu              |    |                             | 20              | Engle and Spears, 2000 [4]   |
| Copper proteinate                                                  | 100*             | Cupric sulfate                          | Liv Cu              |    |                             | 10*, 50 mg/ day | Ward et al., 1996 [3]        |
| Cupric chloride                                                    | 121              | Cupric sulfate                          | Liv Cu              | TP | N-6 mg/kg                   | 14-16           | Ivan et al., 1990 [14]       |
| Cupric chloride                                                    | 114, 102*        | Cupric sulfate                          | Liv Cu              | TP | N-6 mg/kg                   | 14-16           | Ivan et al., 1990 [14]       |
| Cupric oxide                                                       | 25               | Cupric sulfate                          | Liv Cu              | TP | N-7 mg/kg                   | 18              | Xin et al., 1991 [15]        |
| Cupric oxide                                                       | 0, 64*, 7        | Cupric sulfate                          | Pla Cu              | TP | N – 5 mg/kg                 | 30 mg/day       | Kegley and Spears, 1994 [7]  |
| Na <sub>2</sub> CuEDTA.3H <sub>2</sub> O                           | 91               | Cupric sulfate                          | Liv Cu              | MR | N-7 mg/kg                   | 105 mg/day      | Miltimore et al., 1978 [16]  |
| Na <sub>2</sub> CuEDTA.3H <sub>2</sub> O                           | 104              | Cupric sulfate                          | Liv Cu              | MR | N-7 mg/kg                   | 105 mg/day      | Miltimore et al., 1978 [16]  |
| Tribasic copper chloride (TBCC) Cu <sub>2</sub> OH <sub>3</sub> Cl | 121 <sup>3</sup> | Cupric sulfate                          | Pla Cu              |    |                             |                 | Spears et al., 1997 [17]     |
| Tribasic copper chloride (TBCC) Cu <sub>2</sub> OH <sub>3</sub> Cl | 196 <sup>3</sup> | Cupric sulfate                          | Liv Cu              |    |                             |                 | Spears et al., 1997 [17]     |
| Tribasic copper chloride (TBCC) Cu <sub>2</sub> OH <sub>3</sub> Cl | 132              | CuSO <sub>4</sub> .5H <sub>2</sub> O FG | Pla Cu              | SR | N – 5 mg/kg (+ High Mo + S) | 5, 10           | Spears et al., 2004 [18]     |

|                                                                                                       |     |                                         |         |    |                                      |         |                             |
|-------------------------------------------------------------------------------------------------------|-----|-----------------------------------------|---------|----|--------------------------------------|---------|-----------------------------|
| Tribasic copper chloride (TBCC)<br>Cu <sub>2</sub> OH <sub>3</sub> Cl                                 | 118 | CuSO <sub>4</sub> ·5H <sub>2</sub> O FG | Pla Cer | SR | N – 5<br>mg/kg (+<br>High Mo<br>+ S) | 5, 10   | Spears et al.,<br>2004 [18] |
| Tribasic copper chloride (TBCC)<br>Cu <sub>2</sub> OH <sub>3</sub> Cl                                 | 196 | CuSO <sub>4</sub> ·5H <sub>2</sub> O FG | Liv Cu  | SR | N – 5<br>mg/kg (+<br>High Mo<br>+ S) | 5, 10   | Spears et al.,<br>2004 [18] |
| Tribasic copper chloride (TBCC)<br>Cu <sub>2</sub> OH <sub>3</sub> Cl (Exp. 2,<br>Cu depleted steers) | 104 | CuSO <sub>4</sub> ·5H <sub>2</sub> O FG | Pla Cu  | SR | N – 5<br>mg/kg                       | 50, 100 | Spears et al.,<br>2004 [18] |
| Tribasic copper chloride (TBCC)<br>Cu <sub>2</sub> OH <sub>3</sub> Cl (Exp. 2,<br>Cu depleted steers) | 110 | CuSO <sub>4</sub> ·5H <sub>2</sub> O FG | Pla Cer | SR | N – 5<br>mg/kg                       | 50, 100 | Spears et al.,<br>2004 [18] |
| Tribasic copper chloride (TBCC)<br>Cu <sub>2</sub> OH <sub>3</sub> Cl (Exp. 2,<br>Cu depleted steers) | 87  | CuSO <sub>4</sub> ·5H <sub>2</sub> O FG | Liv Cu  | SR | N – 5<br>mg/kg                       | 50, 100 | Spears et al.,<br>2004 [18] |

Liv = liver; Pla = plasma, SR = slope ratio; N = natural; FG = feed grade; abs = absorption; Cer = ceruloplasmin; MR = mean ratio; TP = three-point

<sup>1</sup> A large SD was observed for copper lysine due to the important difference in the apparent absorption efficiency compared to the reference source (Nockels et al., 1993). Without this observation the RBV of copper lysine becomes 98 % ± 5.3 %.

<sup>2</sup> Value for standard source was ≤ that for unsupplemented control group

<sup>3</sup> The higher bioavailability of copper from tribasic copper chloride may relate to the low solubility of copper chloride in the rumen environment, which may reduce the potential for copper to interact with molybdenum and sulfur in the rumen. Tribasic copper chloride and cupric sulfate were similar in bioavailability when evaluated in copper-deficient steers fed diets that were low in molybdenum (Spears et al., 1997)

**Table S2. Poultry**

| Source                                      | RV, %   | Q <sub>f</sub> | Standard                            | Response Criterion                  | Method Calculation | Type diet    | Added level, mg/kg | Reference             |
|---------------------------------------------|---------|----------------|-------------------------------------|-------------------------------------|--------------------|--------------|--------------------|-----------------------|
| Copper chloride, tribasic, TBCC (59.5 % Cu) | 93, 84  |                | CuSO <sub>4</sub> ·H <sub>2</sub> O | Liv Cu, Feather Cu conc.            | SR                 | N – 13 mg/kg | 100, 200, 300      | Kim et al., 2015 [19] |
| Copper chloride, tribasic, TBCC (62.9 % Cu) | 107, 70 |                | CuSO <sub>4</sub> ·H <sub>2</sub> O | Egg yolk Cu conc., Feather Cu conc. | SR                 | N – 15 mg/kg | 100, 200, 300      | Kim et al., 2016 [20] |

|                                                                           |                                 |         |                                                                |         |    |                   |                                 |                                    |
|---------------------------------------------------------------------------|---------------------------------|---------|----------------------------------------------------------------|---------|----|-------------------|---------------------------------|------------------------------------|
| Copper-lysine                                                             | 99, 92*                         |         | Cupric sulfate<br>RG<br>(CuSO <sub>4</sub> ·5H <sub>2</sub> O) | Liv Cu  | SR | N -11<br>mg/kg    | 150, 300,<br>450                | Pott et al., 1994<br>[21]          |
| Copper-lysine                                                             | 116,<br>107*                    |         | Cupric sulfate                                                 | Liv Cu  | SR | N - 290<br>mg/kg  | 75, 150                         | Baker et al.,<br>1991 [22]         |
| Copper-lysine                                                             | 120,<br>99*,<br>102*            |         | Cupric sulfate                                                 | Bile Cu | SR | SP - 5<br>mg/kg   | 0.5, 1                          | Aoyagi and<br>Baker, 1993b<br>[23] |
| Copper-methionine                                                         | 96                              |         | Cupric sulfate                                                 | Bile Cu | SR | SP - 0.5<br>mg/kg | 0.5, 1                          | Aoyagi and<br>Baker, 1993d<br>[24] |
| Copper-methionine                                                         | 88, 91*                         |         | Cupric sulfate                                                 | Liv Cu  | SR |                   | 100, 200                        | Aoyagi and<br>Baker, 1993d<br>[24] |
| Copper methionine                                                         | 117                             |         | Copper sulfate                                                 | Liv Cu  | SR | N - 8             | 20, 40                          | Wen et al., 2019                   |
| Corn gluten meal                                                          | 48                              |         | Cupric sulfate                                                 | Bile Cu | SR | SP - 0.5<br>mg/kg | 1                               | Aoyagi et al.,<br>1993 [25]        |
| Cottonseed meal                                                           | 41                              |         | Cupric sulfate                                                 | Bile Cu | SR | SP - 0.5<br>mg/kg | 1                               | Aoyagi et al.,<br>1993 [25]        |
| Cu amino acid<br>chelate (8.92 % Cu)                                      | 122                             | 3.2     | Cupric sulfate<br>RG                                           | Liv Cu  | SR | N - 16<br>mg/kg   | 150, 300,<br>450                | Guo et al.,<br>2001a [26]          |
| Cu amino acid<br>chelate                                                  | 128                             |         | Cupric sulfate                                                 | Liv Cu  | SR |                   | 150, 300,<br>450                | Guo et al.,<br>2001b [27]          |
| Cu amino acid<br>chelate                                                  | 96                              |         | Cupric sulfate<br>RG<br>(CuSO <sub>4</sub> ·5H <sub>2</sub> O) | Liv Cu  | SR | N - 18<br>mg/kg   | 150, 300,<br>450                | Miles et al.,<br>2003 [28]         |
| Cu chelate of 2-<br>hydroxy-<br>4(methylthio)<br>butanoic acid<br>(HMTBa) | 112 (d<br>14),<br>111 (d<br>35) |         | CuSO <sub>4</sub> ·7H <sub>2</sub> O RG                        | Liv Cu  | SR | N                 | 10, 25, 50,<br>125, 250,<br>500 | Wang et al.,<br>2007 [29]          |
| Cu Lysine (Exp. 1),<br>(10.1 % Cu)                                        | 124,                            | 2.8     | Cupric sulfate                                                 | Liv Cu  | SR | N - 16<br>mg/kg   | 150, 300,<br>450                | Guo et al.,<br>2001a [26]          |
| Cu Lysine (Exp. 2),<br>(10.1 % Cu)                                        | 111 <sup>1</sup>                |         | Cupric sulfate                                                 | Liv Cu  | SR | N - 22<br>mg/kg   | 150, 300,<br>450                | Guo et al.,<br>2001a [26]          |
| Cu oxide                                                                  | 76*                             |         | Cupric sulfate                                                 | Liv Cu  | SC | N                 | 1, 2                            | McNaughton<br>et al., 1974 [30]    |
| Cu proteinate A<br>(10.21 % Cu) (Exp.<br>2)                               | 109                             | 1.1     | Cupric sulfate                                                 | Liv Cu  | SR | N - 22<br>mg/kg   | 150, 300,<br>450                | Guo et al.,<br>2001a [26]          |
| Cu proteinate B<br>(8.68 % Cu) (Exp. 2)                                   | 105                             | 160,000 | Cupric sulfate                                                 | Liv Cu  | SR | N - 22<br>mg/kg   | 150, 300,<br>450                | Guo et al.,<br>2001a [26]          |

|                                                                                   |               |         |                                         |            |    |                        |                   |                              |
|-----------------------------------------------------------------------------------|---------------|---------|-----------------------------------------|------------|----|------------------------|-------------------|------------------------------|
| Cu proteinate C (9.33 % Cu)                                                       | 111           | 220,000 | Cupric sulfate                          | Liv Cu     | SR | N – 16 mg/kg           | 150, 300, 450     | Guo et al., 2001a [26]       |
| Cu proteinate                                                                     | 99            |         | Cupric sulfate                          | Liv Cu     | SR |                        | 150, 300, 450     | Guo et al., 2001b [27]       |
| Cu proteinate (11.7 % Cu)                                                         | 79            | 1.52    | Cupric sulfate RG                       | Liv Cu     | SR | N – 6 mg/kg            | 125, 250          | Liu et al., 2012 [31]        |
| Cu proteinate (11.7 % Cu)                                                         | 79            | 1.52    | Cupric sulfate RG                       | Bile Cu    | SR | N – 6 mg/kg            | 125, 250          | Liu et al., 2012 [31]        |
| Cupric acetate                                                                    | 188           |         | Cupric sulfate                          | Liv Cu     | TP | N – 16 mg/kg           | 720               | Norvell et al., 1974 [32]    |
| Cupric acetate                                                                    | 93*           |         | Cupric sulfate FG                       | Liv Cu     | SR | N – 11 mg/kg           | 150 – 450         | Ledoux et al., 1987 [33]     |
| Cupric acetate RG (31.8 % Cu)                                                     | 99, 112*, 100 |         | Cupric sulfate FG                       | Liv Cu     | SR | N – 11 mg/kg           | 150 – 450         | Ledoux et al., 1991 [34]     |
| Cupric basic carbonate (CuCO <sub>3</sub> ·Cu(OH) <sub>2</sub> )                  | 113           |         | Cupric sulfate                          | Bile Cu    | SR | SP – 0.5 mg/kg         | 0.5, 1            | Aoyagi and Baker, 1993a [35] |
| Cupric carbonate FG                                                               | 66, 68*       |         | Cupric acetate RG                       | Liv Cu     | SR | N – 5 mg/kg            | 5, 10, 20         | Zanetti et al., 1991 [36]    |
| Cupric carbonate FG                                                               | 64*           |         | Cupric acetate RG                       | Liv Cu     | SR | N – 11 mg/kg           | 150, 300, 450     | Ledoux et al., 1987 [33]     |
| Cupric carbonate FG (54.6 % Cu)                                                   | 68, 61*, 54   |         | Cupric acetate RG                       | Liv Cu     | SR | N – 11 mg/kg           | 150, 300, 450     | Ledoux et al., 1991 [34]     |
| Cu <sub>2</sub> (OH) <sub>3</sub> Cl FG                                           | 106           |         | Cupric sulfate RG                       | Liv Cu     | SR | N – 26                 | 150, 300, 450     | Ammerman et al., 1995 [1]    |
| Cu <sub>2</sub> (OH) <sub>3</sub> Cl (Exp.1, 21 d)                                | 103*, 106     |         | Cupric sulfate                          | Liv Cu     | SR | N – 26                 | 150, 300, 450     | Miles et al., 1998 [37]      |
| Cu <sub>2</sub> (OH) <sub>3</sub> Cl (Exp. 2, 42 d)                               | 112           |         | Cupric sulfate                          | Liv Cu     | SR | N – 20 (S), N – 11 (G) | 200, 400, 600     | Miles et al., 1998 [37]      |
| Cu <sub>2</sub> (OH) <sub>3</sub> Cl                                              | 100           |         | Cupric sulfate                          | Liv Cu     | SR | N – 26                 | 150, 300, 450     | Miles et al., 1998 [37]      |
| Cupric chloride, tribasic [Cu <sub>2</sub> (OH) <sub>3</sub> Cl] TBCC             | 112           |         | Cupric sulfate                          | Liv Cu     | SR |                        | 150, 300, 450     | Guo et al., 2001b [27]       |
| Cupric chloride, tribasic [Cu <sub>2</sub> (OH) <sub>3</sub> Cl] TBCC (56.7 % Cu) | 109           |         | CuSO <sub>4</sub> ·5H <sub>2</sub> O RG | Liv Cu     | SR | N – 11 mg/kg           | 150, 300, 450     | Luo et al., 2005 [38]        |
| Cupric chloride, tribasic                                                         | 134           |         | CuSO <sub>4</sub> ·5H <sub>2</sub> O    | Egg weight | SR | N – 6 mg/kg            | 65, 130, 195, 260 | Liu et al., 2005 [39]        |

|                                                                                |                    |  |                      |         |    |                   |                  |                                        |
|--------------------------------------------------------------------------------|--------------------|--|----------------------|---------|----|-------------------|------------------|----------------------------------------|
| [Cu <sub>2</sub> (OH) <sub>3</sub> Cl] TBCC<br>(58 % Cu)                       |                    |  |                      |         |    |                   |                  |                                        |
| Cupric chloride                                                                | 110,<br>106        |  | Cupric sulfate       | Liv Cu  | TP | N – 16<br>mg/kg   | 720              | Norvell et al.,<br>1974 [32]           |
| Cupric chloride                                                                | 106                |  | Cupric sulfate       | Liv Cu  | TP | N – 15<br>mg/kg   | 720              | Norvell et al.,<br>1975 [40]           |
| Cupric chloride,<br>tribasic FG<br>[Cu <sub>2</sub> (OH) <sub>3</sub> Cl] TBCC | 100                |  | Cupric sulfate<br>RG | Liv Cu  | SR | N                 | 200, 400,<br>600 | Miles et al.,<br>1994 [41]             |
| Cupric oxide FG                                                                | -5*                |  | Cupric acetate<br>RG | Liv Cu  | SR | N – 11<br>mg/kg   | 150, 300,<br>450 | Ledoux et al.,<br>1987 [33]            |
| Cupric oxide FG<br>(74.1 % Cu)                                                 | < 1, 1*<br>0.54    |  | Cupric acetate<br>RG | Liv Cu  | SR | N – 11<br>mg/kg   | 150, 300,<br>450 | Ledoux et al.,<br>1991 [34]            |
| Cupric oxide                                                                   | < 1, 0*            |  | Cupric sulfate       | Liv Cu  | SR | N – 290<br>mg/kg  | 75, 150          | Baker et al.,<br>1991 [22]             |
| Cupric oxide                                                                   | 0                  |  | Cupric sulfate       | Bile Cu | SR | SP – 0.5<br>mg/kg | 1, 2             | Aoyagi and<br>Baker, 1993a<br>[35]     |
| Cupric oxide                                                                   | 0                  |  | Cupric sulfate       | Liv Cu  | TP | N – 15<br>mg/kg   | 720              | Norvell et al.,<br>1975 [40]           |
| Cupric oxide RG                                                                | 1                  |  | Cupric sulfate<br>RG | Liv Cu  | TP | N – 14<br>mg/kg   | 750              | Jackson and<br>Stevenson,<br>1981 [42] |
| Cupric oxide RG                                                                | 69*                |  | Cupric sulfate<br>RG | Liv Cu  | TP | N – 14<br>mg/kg   | 750              | Jackson and<br>Stevenson,<br>1981 [42] |
| Cupric Sulfate FG                                                              | 100*               |  | Cupric acetate<br>RG | Liv Cu  | SR | N – 11<br>mg/kg   | 150, 300,<br>450 | Ledoux et al.,<br>1987 [33]            |
| Cupric Sulfate FG<br>(25.1% Cu)                                                | 98,<br>100*,<br>89 |  | Cupric acetate<br>RG | Liv Cu  | SR | N – 11<br>mg/kg   | 150, 300,<br>450 | Ledoux et al.,<br>1991 [34]            |
| Cuprous chloride                                                               | 143                |  | Cupric sulfate       | Bile Cu | SR | SP – 0.5<br>mg/kg | 0.5, 1           | Aoyagi and<br>Baker, 1993a<br>[35]     |
| Cuprous chloride                                                               | 145,<br>81*        |  | Cupric sulfate       | Liv Cu  | SR |                   | 50, 100          | Aoyagi and<br>Baker, 1993d<br>[24]     |
| Cuprous iodide                                                                 | 46, 82*            |  | Cupric sulfate       | Liv Cu  | SC | N                 | 1, 2             | McNaughton<br>et al., 1974 [30]        |
| Cuprous oxide                                                                  | 92, 98*            |  | Cupric sulfate       | Liv Cu  | SR | N – 290<br>mg/kg  | 75 – 150         | Baker et al.,<br>1991 [22]             |

|                              |     |  |                                      |         |    |                   |           |                                      |
|------------------------------|-----|--|--------------------------------------|---------|----|-------------------|-----------|--------------------------------------|
| Cuprous oxide                | 98  |  | Cupric sulfate                       | Bile Cu | SR | SP – 0.5<br>mg/kg | 0.5, 1    | Aoyagi and<br>Baker, 1993a<br>[35]   |
| Feather meal                 | < 1 |  | Cupric sulfate                       | Bile Cu | SR | SP – 0.5<br>mg/kg | 0.5       | Aoyagi et al.,<br>1995 [43]          |
| Hair meal, swine             | 9   |  | Cupric sulfate                       | Bile Cu | SR | SP – 0.5<br>mg/kg | 1         | Aoyagi et al.,<br>1995 [43]          |
| Liver, beef                  | 82  |  | Cupric sulfate                       | Bile Cu | SR | SP – 0.5<br>mg/kg | 1         | Aoyagi et al.,<br>1993 [25]          |
| Liver, pork                  | < 1 |  | Cupric sulfate                       | Bile Cu | SR | SP – 0.5<br>mg/kg | 1         | Aoyagi et al.,<br>1993 [25]          |
| Liver, poultry               | 105 |  | Cupric sulfate                       | Bile Cu | SR | SP – 0.5<br>mg/kg | 1         | Aoyagi et al.,<br>1993 [25]          |
| Liver, sheep                 | 113 |  | Cupric sulfate                       | Bile Cu | SR | SP – 0.5<br>mg/kg | 1         | Aoyagi et al.,<br>1993 [25]          |
| Meat and bone<br>meal, beef  | 4   |  | Cupric sulfate                       | Bile Cu | SR | SP – 0.5<br>mg/kg | 1         | Aoyagi et al.,<br>1995 [43]          |
| Meat and bone<br>meal, mixed | 28  |  | Cupric sulfate                       | Bile Cu | SR | SP – 0.5<br>mg/kg | 1         | Aoyagi et al.,<br>1995 [43]          |
| Meat and bone<br>meal, pork  | 53  |  | Cupric sulfate                       | Bile Cu | SR | SP – 0.5<br>mg/kg | 1         | Aoyagi et al.,<br>1995 [43]          |
| Peanut hulls                 | 44  |  | Cupric sulfate                       | Bile Cu | SR | SP – 0.5<br>mg/kg | 1         | Aoyagi et al.,<br>1993 [25]          |
| Pork liver (Barrow,<br>Gilt) | 0   |  | CuSO <sub>4</sub> ·5H <sub>2</sub> O | Bile Cu | SR | SP – 0.6          | 1         | Aoyagi et al.,<br>1995 [43]          |
| Poultry by-product<br>meal   | 67  |  | Cupric sulfate                       | Bile Cu | SR | SP – 0.5<br>mg/kg | 1         | Aoyagi et al.,<br>1993 [25]          |
| Soybean meal                 | 38  |  | Cupric sulfate                       | Bile Cu | SR | SP – 0.5<br>mg/kg | 1         | Aoyagi et al.,<br>1993 [25]          |
| Soybean mill run             | 47  |  | Cupric sulfate                       | Bile Cu | SR | SP – 0.5<br>mg/kg | 1         | Aoyagi et al.,<br>1993 [25]          |
| Swine feces                  | 36  |  | Cupric sulfate                       | Liv Cu  | SR | SP – 20<br>mg/kg  | 250 – 748 | Izquierdo and<br>Baker, 1986<br>[44] |

Liv = liver; SR = slope ratio; N = natural; SP = semi-purified; RG = reagent grade; FG = feed grade; abs = absorption; SC = standard curve; TP = three-point

<sup>1</sup>Guo et al. reported a RBV difference of 13 percentage points between Exp. 1 and Exp. 2 for Cu Lys which they proposed was due to different strains of chicks used in the 2 experiments

**Table S3. Sheep**



| Source                      | RV, %    | Standard                                                  | Response Criterion | Method Calculation | Type diet    | Added level, mg/kg | Reference                            |
|-----------------------------|----------|-----------------------------------------------------------|--------------------|--------------------|--------------|--------------------|--------------------------------------|
| Copper AA complex           | 100*     | Cupric sulfate                                            | Liv Cu             |                    |              | 10                 | Hatfield et al., 2001 [45]           |
| Copper acetate              | 93, 100* | Cupric chloride RG / CuSO <sub>4</sub> .5H <sub>2</sub> O | Liv Cu             | SR                 |              | 60 – 120           | Ledoux et al., 1995 [46], EMFEMA [2] |
| Copper carbonate            | 121, 97* | Cupric chloride RG / CuSO <sub>4</sub> .5H <sub>2</sub> O | Liv Cu             | SR                 |              | 60 – 120           | Ledoux et al., 1995 [46], EMFEMA [2] |
| Copper chloride             | 100, 96* | Cupric chloride RG / CuSO <sub>4</sub> .5H <sub>2</sub> O | Liv Cu             | SR                 |              | 60 – 120           | Ledoux et al., 1995 [46], EMFEMA [2] |
| Copper EDTA                 | 96       | Cupric sulfate                                            | Liv Cu             | TP                 | N            | 70 mg Cu 1x/wk     | MacPherson and Hemingway, 1968 [47]  |
| Copper glycine              | 96       | Cupric sulfate                                            | Liv Cu             | TP                 | N            | 70 mg Cu 1x/wk     | MacPherson and Hemingway, 1968 [47]  |
| Copper lysine               | 97*, 93  | Cupric sulfate                                            | Liv Cu             | SR                 | N – 10 mg/kg | 180                | Luo et al., 1996 [48]                |
| Copper lysine               | 97*, 68  | Cupric sulfate                                            | Liv Cu             |                    | N – 10 mg/kg | 60, 120, 180       | Pott et al., 1994 [21]               |
| Copper methionine FG        | 152      | Cu sulfate FG                                             | Liv Cu             | SR                 | N – 9 mg/kg  | 15                 | Pal et al., 2010 [49]                |
| Copper methionine FG        | 150      | Cu sulfate FG                                             | Pla Cu             | SR                 | N – 9 mg/kg  | 15                 | Pal et al., 2010 [49]                |
| Copper methionine FG        | 151      | Cu sulfate FG                                             | Gut abs.           | SR                 | N – 9 mg/kg  | 15                 | Pal et al., 2010 [49]                |
| Copper oxide                | 81*      | Cupric chloride RG / CuSO <sub>4</sub> .5H <sub>2</sub> O | Liv Cu             | SR                 |              | 60 – 120           | Ledoux et al., 1995 [46], EMFEMA [2] |
| Copper proteinate           | 103*     | Cupric sulfate                                            | Liv Cu, Kid, Pla   |                    |              | 10 -20 -30         | Eckert et al., 1999 [50]             |
| Cupric acetate RG, Exp. 3   | 93       | Cupric chloride RG                                        | Liv Cu             | SR                 | N – 13 mg/kg | 120                | Ledoux et al., 1995 [46]             |
| Cupric carbonate FG, Exp. 2 | 121      | Cupric chloride RG                                        | Liv Cu             | SR                 | N – 8 mg/kg  | 120                | Ledoux et al., 1995 [46]             |

|                           |           |                    |            |    |                 |           |                               |
|---------------------------|-----------|--------------------|------------|----|-----------------|-----------|-------------------------------|
| Cupric chloride           | 123, 118* | Cupric sulfate     | Liv Cu     | TP | N – 7<br>mg/kg  | 29        | Charmley and Ivan, 1989 [51]  |
| Cupric chloride           | 105, 102* | Cupric sulfate     | Liv Cu     | TP | N – 9<br>mg/kg  | 5, 10     | Ivan et al., 1990 [14]        |
| Cupric oxide FG, Exp. 2   | 35, 22    | Cupric chloride RG | Liv Cu     | SR | N – 8<br>mg/kg  | 120       | Ledoux et al., 1995 [46]      |
| Cupric oxide FG, Exp. 3   | 48        | Cupric chloride RG | Liv Cu     | SR | N – 13<br>mg/kg | 120       | Ledoux et al., 1995 [46]      |
| Cupric sulfate FG, Exp. 2 | 175       | Cupric chloride RG | Liv Cu     | SR | N – 8<br>mg/kg  | 120       | Ledoux et al., 1995 [46]      |
| Cupric sulfate FG, Exp. 3 | 110       | Cupric chloride RG | Liv Cu     | SR | N – 13<br>mg/kg | 120       | Ledoux et al., 1995 [46]      |
| Cupric sulfide            | 35        | Cupric sulfate     | Liv Cu     | MR | N               | 30 mg/day | Dick, 1954 [52]               |
| Cupric sulfide            | 11        | Cupric sulfate     | Pla Cu reg | MR | SP – 2<br>mg/kg | 5         | Suttle, 1974b [53]            |
| Cuprous acetate           | 98, 110*  | Cupric sulfate     | Liv Cu     | TP | N – 7<br>mg/kg  | 29        | Charmley and Ivan, 1989 [51]  |
| Swine feces               | 35        | Cupric sulfate     | Liv Cu     | MR |                 | 30, 60    | Prince et al., 1975 [54]      |
| Swine feces               | 70        | Cupric sulfate     | Liv Cu     | MR | N               | 4         | Dalgarno and Mills, 1975 [55] |
| Swine feces               | 60        | Cupric sulfate     | Pla Cu     | MR | N               | 4         | Dalgarno and Mills, 1975 [55] |
| Swine feces               | 80        | Cupric sulfate     | Pla Cu     | TP | SP              | 8         | Suttle and Price, 1976 [56]   |
| Swine feces               | 75        | Cupric sulfate     | Pla Cu     | TP | SP              | 4         | Suttle and Price, 1976 [56]   |
| Swine feces               | 25        | Cupric sulfate     | Liv Cu     | TP | N – 8<br>mg/kg  | 13 – 16   | Poole et al., 1990 [57]       |

Liv = liver; Pla = plasma; AA = amino acid; abs = absorption; Kid = kidney; reg = regeneration; SR = slope ratio; MR = mean ratio; N = natural; SP = semi-purified; RG = reagent grade; TP = three-point; EDTA = ethylenediaminetetraacetate

**Table S4. Swine**

| Source                            | RV, %   | Standard       | Response Criterion | Method Calculation | Type diet | Added level, mg/kg | Reference                    |
|-----------------------------------|---------|----------------|--------------------|--------------------|-----------|--------------------|------------------------------|
| Copper citrate + sodium molybdate | 93, 99* | Cupric sulfate | Liv Cu             | MR                 | N         | 20                 | Dowdy and Matrone, 1968 [58] |
| Copper citrate + sodium molybdate | 74      | Cupric sulfate | Cer                | MR                 | N         | 20                 | Dowdy and Matrone, 1968 [58] |

|                             |           |                |                     |    |               |                          |                              |
|-----------------------------|-----------|----------------|---------------------|----|---------------|--------------------------|------------------------------|
| Copper chloride, tribasic   | 97*       | Cupric sulfate | Liv Cu              |    | 12 mg/kg      | 20                       | Cromwell et al., 1998 [59]   |
| Copper lysine               | 101       | Cupric sulfate | Liv Cu              |    | 2 mg/kg       | 100, 150, 200            | Apgar et al., 1995 [60]      |
| Copper lysine               | 73        | Cupric sulfate | Cu abs              |    | 3 mg/kg       | 200                      | Apgar et al., 1996 [61]      |
| Copper lysine               | 101*      | Cupric sulfate | Liv Cu              |    | 9 mg/kg       | 50, 100, 200, 250        | Coffey et al., 1994 [62]     |
| Copper methionine           | 107, 100* | Cupric sulfate | Liv Cu              | TP | N – 10+ mg/kg | 250                      | Bunch et al., 1965 [63]      |
| Copper-molybdenum complex   | 68, 95*   | Cupric sulfate | Liv Cu              | MR | N             | 20                       | Dowdy and Matrone, 1968 [58] |
| Copper-molybdenum complex   | 0         | Cupric sulfate | Cer                 | MR | N             | 20                       | Dowdy and Matrone, 1968 [58] |
| Copper proteinate (10 % Cu) | 183       | TBCC           | ADG                 | SR | N             | 5, 10, 20, 40, 80, 160   | Lin et al., 2020 [64]        |
| Copper proteinate (10 % Cu) | 172       | TBCC           | FCR                 | SR | N             | 5, 10, 20, 40, 80, 160   | Lin et al., 2020 [64]        |
| Copper proteinate (10 % Cu) | 156       | TBCC           | ALP                 | SR | N             | 5, 10, 20, 40, 80, 160   | Lin et al., 2020 [64]        |
| Copper proteinate (10 % Cu) | 263       | TBCC           | Cer                 | SR | N             | 5, 10, 20, 40, 80, 160   | Lin et al., 2020 [64]        |
| Copper proteinate (10 % Cu) | 205       | TBCC           | Cu/Zn SOD           | SR | N             | 5, 10, 20, 40, 80, 160   | Lin et al., 2020 [64]        |
| Copper proteinate (10 % Cu) | 114       | TBCC           | GSH-Px              | SR | N             | 5, 10, 20, 40, 80, 160   | Lin et al., 2020 [64]        |
| Copper proteinate (10 % Cu) | 133       | TBCC           | MDA                 | SR | N             | 5, 10, 20, 40, 80, 160   | Lin et al., 2020 [64]        |
| Copper proteinate (10 % Cu) | 208       | TBCC           | Jejunal Cu          | SR | N             | 5, 10, 20, 40, 80, 160   | Lin et al., 2020 [64]        |
| Cupric carbonate            | 62, 92*   | Cupric sulfate | Liv Cu              | TP | N             | 250                      | Allen et al., 1961 [65]      |
| Cupric carbonate            | 111, 108* | Cupric sulfate | <sup>64</sup> Cu WB | MR | N – 15 mg/kg  | Single oral dose – 10 mg | Buescher et al., 1961 [66]   |
| Cupric carbonate,           | 99*       | Cupric sulfate | Cer, Liv Cu         |    |               | 250                      | Bunch et al., 1965 [63]      |
| Cupric oxide                | 89, 104*1 | Cupric sulfate | <sup>64</sup> Cu WB | MR | N – 15 mg/kg  | Single oral dose         | Buescher et al., 1961 [66]   |

|                |         |                |                      |    |                 |     |                               |
|----------------|---------|----------------|----------------------|----|-----------------|-----|-------------------------------|
| Cupric oxide   | 15, 64* | Cupric sulfate | Liv Cu               | MR | N – 3<br>mg/kg  | 250 | Bunch et al.,<br>1961 [67]    |
| Cupric oxide   | 27      | Cupric sulfate | Liv Cu               | TP | N – 10<br>mg/kg | 250 | Bunch et al.,<br>1963 [68]    |
| Cupric oxide   | 55*     | Cupric sulfate | Liv Cu               |    | 5               | 250 | Bekaert et al.,<br>1967 [69]  |
| Cupric oxide   | 0, 75*  | Cupric sulfate | Liv Cu               | MR | N – 30<br>mg/kg | 250 | Cromwell et al.,<br>1989 [70] |
| Cupric sulfide | 0, 69*  | Cupric sulfate | Liv Cu               | TP | N               | 250 | Barber et al.,<br>1961 [71]   |
| Cupric sulfide | 33      | Cupric sulfate | Cu <sup>64</sup> upt | MR | N               | 250 | Bowland et al.,<br>1961 [72]  |
| Cupric sulfide | 23      | Cupric sulfate | Cu <sup>64</sup> upt | MR | N               | 250 | Bowland et al.,<br>1961 [72]  |
| Cupric sulfide | <1, 53* | Cupric sulfate | Liv Cu               | MR | N               | 250 | Cromwell et al.,<br>1978 [73] |

Liv = liver; Cer = ceruloplasmin; abs = absorption; SR = slope ratio; MR = mean ratio; N = natural; TP = three-point; TBCC = dicopper chloride trihydroxide (tribasic copper chloride); Upt = uptake; ADG = average daily gain; FCR = feed conversion ratio; ALP = alkaline phosphatase; SOD = superoxide dismutase; GSH-Px = glutathione peroxidase; MDA = malondialdehyde; WB = whole blood

<sup>1</sup> Unexpectedly high value due to results by Buescher et al. showing cupric oxide had the same bioavailability as cupric sulfate using labelled copper, which gave value obtained from De Groote et al. (\*) a large standard deviation (74 % ± 21 %). If this observation was omitted the RBV of Cu in CuO would have been 63 % ± 11 %.

## IRON

### Individual species tables for relative bioavailability of supplemental iron sources

**Table S5. Cattle**

| Source                  | RV, % | Standard                               | Response<br>Criterion | Method<br>Calculation | Type<br>diet     | Added<br>level,<br>mg/kg | Reference                             |
|-------------------------|-------|----------------------------------------|-----------------------|-----------------------|------------------|--------------------------|---------------------------------------|
| Ferric citrate          | 107   | FeSO <sub>4</sub>                      | Hb                    | TP                    | N – 10<br>mg/kg  | 30                       | Bremner and<br>Dalgarno, 1973<br>[74] |
| Ferric EDTA             | 93    | FeSO <sub>4</sub>                      | Hb                    | TP                    | N – 10<br>mg/kg  | 30                       | Bremner and<br>Dalgarno, 1973<br>[74] |
| Ferrous carbonate<br>FG | 0     | FeSO <sub>4</sub> .H <sub>2</sub> O FG | Liv Fe                | TP                    | N – 180<br>mg/kg | 1000                     | McGuire et al.,<br>1985 [75]          |
| Ferrous carbonate<br>FG | 79    | FeSO <sub>4</sub> .H <sub>2</sub> O FG | Kid Fe                | TP                    | N – 180<br>mg/kg | 1000                     | McGuire et al.,<br>1985 [75]          |

|                          |    |                                        |        |    |               |                       |                                 |
|--------------------------|----|----------------------------------------|--------|----|---------------|-----------------------|---------------------------------|
| Ferrous carbonate FG     | 23 | FeSO <sub>4</sub> .H <sub>2</sub> O FG | Spl Fe | TP | N – 180 mg/kg | 1000                  | McGuire et al., 1985 [75]       |
| Ferrous carbonate        | 25 | Ferrous sulfate FG                     | Growth |    | N - 170       | 500, 1000, 2000, 4000 | Miller et al., 1991 [76]        |
| Iron phytate (17.7 % Fe) | 47 | FeSO <sub>4</sub>                      | Hb     | TP | N – 10 mg/kg  | 30                    | Bremner and Dalgarno, 1973 [74] |

Hb = hemoglobin; Liv = liver; Kid = kidney; Spl = spleen; N = natural; FG = feed grade; TP = three-point; EDTA = ethylenediaminetetraacetate

**Table S6. Poultry**

| Source                         | RV, % | Q <sub>t</sub> | Standard                                | Response Criterion | Method Calculation | Type diet    | Added level, mg/kg | Reference                                 |
|--------------------------------|-------|----------------|-----------------------------------------|--------------------|--------------------|--------------|--------------------|-------------------------------------------|
| Alfalfa meal (340 mg/kg Fe AD) | 65    |                | FeSO <sub>4</sub> .7H <sub>2</sub> O    | Hb reg             | SC                 | P            | 10 – 20            | Chausow and Czarnecki-Maulden, 1988b [77] |
| Beef liver (235 mg/kg Fe AD)   | 90    |                | FeSO <sub>4</sub> .7H <sub>2</sub> O    | Hb reg             | SR                 | P – 5 mg/kg  | 10, 20             | Chausow and Czarnecki-Maulden, 1988a [78] |
| Beet pulp                      | 26    |                | Ferrous sulfate                         | Hb reg             | SC                 | P – 10 mg/kg |                    | Fly et al., 1998 [79]                     |
| Blood meal (1610 mg/kg Fe AD)  | 22    |                | FeSO <sub>4</sub> .7H <sub>2</sub> O    | Hb reg             | SC                 | P            | 5 – 15             | Chausow and Czarnecki-Maulden, 1988b [77] |
| Blood meal                     | 35    |                | FeSO <sub>4</sub> .7H <sub>2</sub> O RG | Hb reg             | SC <sup>1</sup>    | SP           | 5 – 20             | Pla and Fritz, 1970 [80]                  |
| Blood meal                     | 35    |                | FeSO <sub>4</sub> .H <sub>2</sub> O RG  | Hb reg             | SC <sup>1</sup>    | SP – 7 mg/kg | 5 – 20             | Fritz et al., 1970 [81]                   |
| Bone meal, steamed             | 0     |                | FeSO <sub>4</sub> .7H <sub>2</sub> O RG | Hb reg             | SC                 | P – 5 mg/kg  | 5 – 20             | Deming and Czarnecki-Maulden, 1989 [82]   |
| Corn fiber, coarse             | 69    |                | Ferrous sulfate                         | Hb reg             | SC                 | P- 10 mg/kg  |                    | Fly et al., 1998 [79]                     |
| Corn germ meal                 | 40    |                | FeSO <sub>4</sub> .7H <sub>2</sub> O RG | Hb reg             | SC <sup>1</sup>    | SP           | 5 – 20             | Pla and Fritz, 1970 [80]                  |
| Corn germ                      | 40    |                | FeSO <sub>4</sub> .7H <sub>2</sub> O RG | Hb reg             | SC <sup>1</sup>    | SP – 7 mg/kg | 5 – 20             | Fritz et al., 1970 [81]                   |

|                                         |         |       |                                            |                    |                 |                  |                    |                                                     |
|-----------------------------------------|---------|-------|--------------------------------------------|--------------------|-----------------|------------------|--------------------|-----------------------------------------------------|
| Corn gluten meal (102 mg/kg Fe AD)      | 84      |       | FeSO <sub>4</sub> ·7H <sub>2</sub> O<br>RG | Hb reg             | SC <sup>1</sup> | SP – 5<br>mg/kg  | 10, 20             | Chausow and<br>Czarnecki-<br>Maulden,<br>1988a [78] |
| Corn, ground (100 mg/kg Fe AD)          | 20      |       | FeSO <sub>4</sub> ·7H <sub>2</sub> O<br>RG | Hb reg             | SC              | P                | 10 – 20            | Chausow and<br>Czarnecki-<br>Maulden,<br>1988b [77] |
| Cottonseed meal (200 mg Fe / kg)        | 56      |       | FeSO <sub>4</sub> ·7H <sub>2</sub> O       | Hb reg             | SR              | SP – 20<br>mg/kg | 10 – 20            | Boling et al.,<br>1998 [83]                         |
| Defluorinated<br>phosphate              | 48      |       | FeSO <sub>4</sub> ·7H <sub>2</sub> O<br>RG | Hb reg             |                 |                  | 7.5, 15.0,<br>22.5 | Henry et al.,<br>1992 [84]                          |
| Egg, yolk                               | 33      |       | FeSO <sub>4</sub> ·7H <sub>2</sub> O<br>RG | Hb reg             | SC <sup>1</sup> | SP – 7<br>mg/kg  | 5 – 20             | Fritz et al.,<br>1970 [81]                          |
| Feather meal (570 mg/kg Fe AD)          | 39      |       | FeSO <sub>4</sub> ·7H <sub>2</sub> O<br>RG | Hb reg             | SC              | P                | 5 – 15             | Chausow and<br>Czarnecki-<br>Maulden,<br>1988b [77] |
| Fe proteinate (14.15 % Fe) <sup>5</sup> | 117     | 43.6  | FeSO <sub>4</sub> ·7H <sub>2</sub> O<br>RG | Hb conc.           | SR              | P – 5<br>mg/kg   | 10, 20, 40         | Ma et al., 2014<br>[85]                             |
| Fe proteinate (14.15 % Fe)              | 114     | 43.6  | FeSO <sub>4</sub> ·7H <sub>2</sub> O<br>RG | Total body<br>Hb   | SR              | P – 5<br>mg/kg   | 10, 20, 40         | Ma et al., 2014<br>[85]                             |
| Fe proteinate (14.15 % Fe)              | 103     | 43.6  | FeSO <sub>4</sub> ·7H <sub>2</sub> O<br>RG | Hematocrit         | SR              | P – 5<br>mg/kg   | 10, 20, 40         | Ma et al., 2014<br>[85]                             |
| Fe proteinate (14.15 % Fe)              | 96      | 43.6  | FeSO <sub>4</sub> ·7H <sub>2</sub> O<br>RG | Liv Fe             | SR              | P – 5<br>mg/kg   | 10, 20, 40         | Ma et al., 2014<br>[85]                             |
| Fe proteinate (14.15 % Fe)              | 100     | 43.6  | FeSO <sub>4</sub> ·7H <sub>2</sub> O<br>RG | Kid Fe             | SR              | P – 5<br>mg/kg   | 10, 20, 40         | Ma et al., 2014<br>[85]                             |
| Fe methionine                           | 88, 86* |       | FeSO <sub>4</sub> ·7H <sub>2</sub> O<br>RG | Liv Fe             | SR              | P- 188<br>mg/kg  | 400, 600,<br>800   | Cao et al., 1996<br>[86]                            |
| Fe – Met (W) (14.7 % Fe)                | 129     | 1.37  | FeSO <sub>4</sub> ·7H <sub>2</sub> O<br>RG | SDH mRNA<br>liver  | SR              | N – 56<br>mg/kg  | 20, 40, 60         | Zhang et al.,<br>2016 [87]                          |
| Fe – Met (W) (14.7 % Fe)                | 102     | 1.37  | FeSO <sub>4</sub> ·7H <sub>2</sub> O<br>RG | SDH mRNA<br>kidney | SR              | N – 56<br>mg/kg  | 20, 40, 60         | Zhang et al.,<br>2016 [87]                          |
| Fe – Prot. (M) (14.2 % Fe) <sup>5</sup> | 164     | 43.6  | FeSO <sub>4</sub> ·7H <sub>2</sub> O<br>RG | SDH mRNA<br>liver  | SR              | N – 56<br>mg/kg  | 20, 40, 60         | Zhang et al.,<br>2016 [87]                          |
| Fe – Prot. (M) (14.2 % Fe)              | 143     | 43.6  | FeSO <sub>4</sub> ·7H <sub>2</sub> O<br>RG | SDH mRNA<br>kidney | SR              | N – 56<br>mg/kg  | 20, 40, 60         | Zhang et al.,<br>2016 [87]                          |
| Fe – Prot. (ES) (10.2 % Fe)             | 174     | 8,590 | FeSO <sub>4</sub> ·7H <sub>2</sub> O<br>RG | SDH mRNA<br>liver  | SR              | N – 56<br>mg/kg  | 20, 40, 60         | Zhang et al.,<br>2016 [87]                          |
| Fe – Prot. (ES) (10.2 % Fe)             | 174     | 8,590 | FeSO <sub>4</sub> ·7H <sub>2</sub> O<br>RG | SDH mRNA<br>kidney | SR              | N – 56<br>mg/kg  | 20, 40, 60         | Zhang et al.,<br>2016 [87]                          |

|                                                                            |                                            |  |                                            |        |                 |                  |            |                                    |
|----------------------------------------------------------------------------|--------------------------------------------|--|--------------------------------------------|--------|-----------------|------------------|------------|------------------------------------|
| Fe-ZnSO <sub>4</sub> .H <sub>2</sub> O (20.2 % Fe, 13.0 % Zn)              | 112* <sup>3</sup><br>126 <sup>4</sup>      |  | Ferrous sulfate                            | Hb reg | SR              | SP – 20<br>mg/kg | 10, 20     | Boling et al.,<br>1998 [83]        |
| Ferric ammonium citrate                                                    | 107                                        |  | FeSO <sub>4</sub> .7H <sub>2</sub> O<br>RG | Hb reg | SC <sup>1</sup> | SP               | 5 – 20     | Pla and Fritz,<br>1970 [80]        |
| Ferric ammonium citrate                                                    | 115,<br>115*<br>(98 –<br>115) <sup>2</sup> |  | FeSO <sub>4</sub> .7H <sub>2</sub> O<br>RG | Hb reg | SC <sup>1</sup> | SP               | 5 – 20     | Fritz et al.,<br>1970 [81]         |
| Ferric chloride                                                            | 44 (26<br>– 67) <sup>2</sup>               |  | FeSO <sub>4</sub> .7H <sub>2</sub> O<br>RG | Hb reg | SC <sup>1</sup> | SP – 7<br>mg/kg  | 5 – 20     | Fritz et al.,<br>1970 [81]         |
| Ferric chloride                                                            | 78, 78*                                    |  | FeSO <sub>4</sub> .7H <sub>2</sub> O<br>RG | Hb reg | SC <sup>1</sup> | SP               | 5 – 20     | Pla and Fritz,<br>1970 [80]        |
| Ferric choline citrate                                                     | 102                                        |  | FeSO <sub>4</sub> .7H <sub>2</sub> O<br>RG | Hb reg | SC <sup>1</sup> | SP – 7<br>mg/kg  | 5 – 20     | Fritz et al.,<br>1970 [81]         |
| Ferric choline citrate                                                     | 102                                        |  | FeSO <sub>4</sub> .7H <sub>2</sub> O<br>RG | Hb reg | SC <sup>1</sup> | SP               | 5 – 20     | Pla and Fritz,<br>1970 [80]        |
| Ferric choline chloride                                                    | 93*,<br>94                                 |  | Ferrous sulfate                            | Hb reg | SC              | SP               | 5 – 20     | McNaughton<br>et al., 1974<br>[30] |
| Ferric citrate                                                             | 73 (70<br>– 76) <sup>2</sup>               |  | FeSO <sub>4</sub> .7H <sub>2</sub> O<br>RG | Hb reg | SC <sup>1</sup> | SP – 7<br>mg/kg  | 5 – 20     | Fritz et al.,<br>1970 [81]         |
| Ferric glycerophosphate                                                    | 93 (86<br>– 100) <sup>2</sup>              |  | FeSO <sub>4</sub> .7H <sub>2</sub> O<br>RG | Hb reg | SC <sup>1</sup> | SP – 7<br>mg/kg  | 5 – 20     | Fritz et al.,<br>1970 [81]         |
| Ferric orthophosphate (0.8%) + Rice (FePO <sub>4</sub> .4H <sub>2</sub> O) | 36                                         |  | FeSO <sub>4</sub> .7H <sub>2</sub> O<br>RG | Hb reg | SR              | P < 7<br>mg/kg   | 5 – 40     | Amine et al.,<br>1972 [88]         |
| FePO <sub>4</sub> .4H <sub>2</sub> O                                       | 11, 13*                                    |  | FeSO <sub>4</sub> .7H <sub>2</sub> O<br>RG | Hb reg | SR              | P < 7<br>mg/kg   | 5 – 40     | Amine et al.,<br>1972 [88]         |
| Ferric orthophosphate – 1                                                  | 18, 13*<br>(7-32) <sup>2</sup>             |  | FeSO <sub>4</sub> .7H <sub>2</sub> O<br>RG | Hb reg | SC <sup>1</sup> | SP – 7<br>mg/kg  | 5 – 20     | Fritz et al.,<br>1970 [81]         |
| Ferric orthophosphate – 2                                                  | 9                                          |  | FeSO <sub>4</sub> .7H <sub>2</sub> O<br>RG | Hb reg | SC <sup>1</sup> | SP – 7<br>mg/kg  | 5 – 20     | Fritz et al.,<br>1970 [81]         |
| Ferric orthophosphate – 3                                                  | 12                                         |  | FeSO <sub>4</sub> .7H <sub>2</sub> O<br>RG | Hb reg | SC <sup>1</sup> | SP – 7<br>mg/kg  | 5 – 20     | Fritz et al.,<br>1970 [81]         |
| Ferric orthophosphate FePO <sub>4</sub> .4H <sub>2</sub> O                 | 15                                         |  | FeSO <sub>4</sub> .7H <sub>2</sub> O<br>RG | Hb reg | SR              | P < 7<br>mg/kg   | 10, 20, 40 | Amine et al.,<br>1972 [88]         |
| Ferric orthophosphate (28.6 % Fe)                                          | 12                                         |  | FeSO <sub>4</sub> .7H <sub>2</sub> O<br>RG | Hb reg | SC <sup>1</sup> | SP – 7<br>mg/kg  | 5 – 20     | Pla and Fritz,<br>1970 [80]        |
| Ferric orthophosphate                                                      | 15                                         |  | FeSO <sub>4</sub> .7H <sub>2</sub> O<br>RG | Hb reg | SC <sup>1</sup> | SP               | 5 – 20     | Pla and Fritz,<br>1970 [80]        |
| Ferric orthophosphate                                                      | 12*                                        |  | FeSO <sub>4</sub> .7H <sub>2</sub> O<br>RG | Hb reg | SC <sup>1</sup> | SP               | 5 – 20     | Pla and Fritz,<br>1971 [89]        |

|                                                                                                  |                               |  |                                            |        |                 |                  |          |                              |
|--------------------------------------------------------------------------------------------------|-------------------------------|--|--------------------------------------------|--------|-----------------|------------------|----------|------------------------------|
| Ferric orthophosphate                                                                            | 4*                            |  | Ferrous sulfate                            | Hb reg |                 |                  |          | Pennell et al., 1976 [90]    |
| Ferric oxide                                                                                     | 4, 4*<br>(0–6) <sup>2</sup>   |  | FeSO <sub>4</sub> ·7H <sub>2</sub> O<br>RG | Hb reg | SC <sup>1</sup> | SP – 7<br>mg/kg  | 5–20     | Fritz et al., 1970 [81]      |
| Ferric oxide Fe <sub>2</sub> O <sub>3</sub>                                                      | 17                            |  | FeSO <sub>4</sub> ·7H <sub>2</sub> O       | Hb reg | TP              | N                | 2 mg/day | Elvehjem et al., 1929 [91]   |
| Ferric oxide (60 % Fe)                                                                           | 67                            |  | FeSO <sub>4</sub> ·7H <sub>2</sub> O       | Hb reg | SR              | N                | 10–20    | Poitevint, 1979 [92]         |
| Ferric oxide                                                                                     | 77*,<br>82                    |  | Ferrous sulfate                            | Hb reg | SC              | N                | 5–20     | McNaughton et al., 1974 [30] |
| Ferric pyrophosphate                                                                             | 45                            |  | FeSO <sub>4</sub> ·7H <sub>2</sub> O<br>RG | Hb reg | SC <sup>1</sup> | SP               | 5–20     | Pla and Fritz, 1970 [80]     |
| Ferric pyrophosphate                                                                             | 45                            |  | FeSO <sub>4</sub> ·7H <sub>2</sub> O<br>RG | Hb reg | SC <sup>1</sup> | SP – 7<br>mg/kg  | 5–20     | Fritz et al., 1970 [81]      |
| Ferric sulfate                                                                                   | 65*                           |  | FeSO <sub>4</sub> ·7H <sub>2</sub> O<br>RG | Hb reg | SC <sup>1</sup> | SP – 7<br>mg/kg  | 5–20     | Fritz et al., 1970 [81]      |
| Ferric sulfate                                                                                   | 104                           |  | Ferrous sulfate                            | Hb reg | MR              |                  | 60, 100  | Moore et al., 1988 [93]      |
| Ferric sulfate (22.7 % Fe)<br>Fe <sub>2</sub> (SO <sub>4</sub> ) <sub>3</sub> ·7H <sub>2</sub> O | 37*                           |  | FeSO <sub>4</sub> ·7H <sub>2</sub> O       | Hb reg | SR              | SP – 20<br>mg/kg | 10–20    | Boling et al., 1998 [83]     |
| Ferrous ammonium sulfate                                                                         | 99<br>(99 – 100) <sup>2</sup> |  | FeSO <sub>4</sub> ·7H <sub>2</sub> O<br>RG | Hb reg | SC <sup>1</sup> | SP – 7<br>mg/kg  | 5–20     | Fritz et al., 1970 [81]      |
| Ferrous carbonate                                                                                | 8, 55*,                       |  | FeSO <sub>4</sub> ·7H <sub>2</sub> O<br>RG | Hb reg | SR              | P < 7<br>mg/kg   | 5–40     | Amine et al., 1972 [88]      |
| Ferrous carbonate                                                                                | 10                            |  | FeSO <sub>4</sub> ·7H <sub>2</sub> O<br>RG | Hb reg | SR              | P < 7<br>mg/kg   | 5–40     | Amine et al., 1972 [88]      |
| Ferrous carbonate – 1                                                                            | 2, 3*<br>(0–6) <sup>2</sup>   |  | FeSO <sub>4</sub> ·7H <sub>2</sub> O<br>RG | Hb reg | SC <sup>1</sup> | SP – 7<br>mg/kg  | 5–20     | Fritz et al., 1970 [81]      |
| Ferrous carbonate – 2                                                                            | 2                             |  | FeSO <sub>4</sub> ·7H <sub>2</sub> O<br>RG | Hb reg | SC <sup>1</sup> | SP – 7<br>mg/kg  | 5–20     | Fritz et al., 1970 [81]      |
| Ferrous carbonate – 3                                                                            | 6                             |  | FeSO <sub>4</sub> ·7H <sub>2</sub> O<br>RG | Hb reg | SC <sup>1</sup> | SP – 7<br>mg/kg  | 5–20     | Fritz et al., 1970 [81]      |
| Ferrous carbonate – 4                                                                            | 2                             |  | FeSO <sub>4</sub> ·7H <sub>2</sub> O<br>RG | Hb reg | SC <sup>1</sup> | SP – 7<br>mg/kg  | 5–20     | Fritz et al., 1970 [81]      |
| Ferrous carbonate – 1                                                                            | 2, 5*                         |  | FeSO <sub>4</sub> ·7H <sub>2</sub> O<br>RG | Hb reg | SC <sup>1</sup> | SP               | 5–20     | Pla and Fritz, 1970 [80]     |
| Ferrous carbonate – 2                                                                            | 7                             |  | FeSO <sub>4</sub> ·7H <sub>2</sub> O<br>RG | Hb reg | SC <sup>1</sup> | SP               | 5–20     | Pla and Fritz, 1970 [80]     |
| Ferrous carbonate – 1                                                                            | 2                             |  | FeSO <sub>4</sub> ·7H <sub>2</sub> O<br>RG | Hb reg | SC <sup>1</sup> | SP               | 5–20     | Pla and Fritz, 1970 [80]     |



|                                                                 |                                  |  |                                            |        |                 |                  |                    |                               |
|-----------------------------------------------------------------|----------------------------------|--|--------------------------------------------|--------|-----------------|------------------|--------------------|-------------------------------|
| Ferrous carbonate – 2                                           | 7                                |  | FeSO <sub>4</sub> ·7H <sub>2</sub> O<br>RG | Hb reg | SC <sup>1</sup> | SP               | 5 – 20             | Pla and Fritz,<br>1970 [80]   |
| Ferrous carbonate – 3                                           | 0                                |  | FeSO <sub>4</sub> ·7H <sub>2</sub> O<br>RG | Hb reg | SC <sup>1</sup> | SP               | 5 – 20             | Pla and Fritz,<br>1970 [80]   |
| Ferrous carbonate – 4                                           | 2                                |  | FeSO <sub>4</sub> ·7H <sub>2</sub> O<br>RG | Hb reg | SC <sup>1</sup> | SP               | 5 – 20             | Pla and Fritz,<br>1970 [80]   |
| Ferrous carbonate (42 %<br>Fe)                                  | 88                               |  | FeSO <sub>4</sub> ·7H <sub>2</sub> O       | Hb     | SR              | N                | 10 – 20            | Poitevint, 1979<br>[92]       |
| Ferrous carbonate ore<br>(38 % Fe)                              | 3, 3*                            |  | FeSO <sub>4</sub> ·7H <sub>2</sub> O<br>RG | Hb reg | SC <sup>1</sup> | SP – 7<br>mg/kg  | 5 – 20             | Pla and Fritz,<br>1971 [89]   |
| Ferrous chloride                                                | 98                               |  | FeSO <sub>4</sub> ·7H <sub>2</sub> O<br>RG | Hb reg | SC <sup>1</sup> | SP – 7<br>mg/kg  | 5 – 20             | Fritz et al.,<br>1970 [81]    |
| Ferrous chloride                                                | 106,<br>106*                     |  | FeSO <sub>4</sub> ·7H <sub>2</sub> O<br>RG | Hb reg | SC <sup>1</sup> | SP – 7<br>mg/kg  | 5 – 20             | Pla and Fritz,<br>1971 [89]   |
| Ferrous EDTA-<br>dihydrogen                                     | 99<br>(97 –<br>100) <sup>2</sup> |  | FeSO <sub>4</sub> ·7H <sub>2</sub> O       | Hb reg | SC <sup>1</sup> | SP – 7<br>mg/kg  | 5 – 20             | Fritz et al.,<br>1970 [81]    |
| Ferrous fumarate                                                | 95<br>(71 –<br>133) <sup>2</sup> |  | FeSO <sub>4</sub> ·7H <sub>2</sub> O<br>RG | Hb reg | SC <sup>1</sup> | SP – 7<br>mg/kg  | 5 – 20             | Fritz et al.,<br>1970 [81]    |
| Ferrous fumarate                                                | 102                              |  | FeSO <sub>4</sub> ·7H <sub>2</sub> O<br>RG | Hb reg | SC <sup>1</sup> | SP – 7<br>mg/kg  | 5 – 20             | Pla and Fritz,<br>1970 [80]   |
| Ferrous gluconate                                               | 97                               |  | FeSO <sub>4</sub> ·7H <sub>2</sub> O<br>RG | Hb reg | SC <sup>1</sup> | SP – 7<br>mg/kg  | 5 – 20             | Fritz et al.,<br>1970 [81]    |
| Ferrous gluconate                                               | 97                               |  | FeSO <sub>4</sub> ·7H <sub>2</sub> O<br>RG | Hb reg | SC <sup>1</sup> | SP – 7<br>mg/kg  | 5 – 20             | Pla and Fritz,<br>1970 [80]   |
| Ferrous sulfate, FG                                             | 100,<br>65*                      |  | FeSO <sub>4</sub> ·7H <sub>2</sub> O<br>RG | Hb reg | SC <sup>1</sup> | SP – 7<br>mg/kg  | 5 – 20             | Fritz et al.,<br>1970 [81]    |
| Ferrous sulfate<br>(FeSO <sub>4</sub> ·H <sub>2</sub> O) (31 %) | 103                              |  | FeSO <sub>4</sub> ·7H <sub>2</sub> O<br>RG | Hb reg | SR              | N                | 10 – 20            | Poitevint, 1979<br>[92]       |
| Ferrous sulfate FG<br>(FeSO <sub>4</sub> ·H <sub>2</sub> O)     | 102                              |  | FeSO <sub>4</sub> ·7H <sub>2</sub> O<br>RG | Hb reg | SR              | P – 4<br>mg/kg   | 7.5 – 22.5         | Ammerman et<br>al., 1993 [94] |
| Ferrous sulfate FG<br>(FeSO <sub>4</sub> ·H <sub>2</sub> O)     | 92, 91*                          |  | FeSO <sub>4</sub> ·7H <sub>2</sub> O<br>RG | Liv Fe | SR              | N – 123<br>mg/kg | 400, 600,<br>800   | Cao et al., 1996<br>[86]      |
| Ferrous sulfate<br>monohydrate                                  | 102*                             |  | FeSO <sub>4</sub> ·7H <sub>2</sub> O<br>RG | Hb reg |                 |                  | 7.5, 15.0,<br>22.5 | Henry et al.,<br>1992 [84]    |
| Ferrous sulfate,<br>anhydrous                                   | 100                              |  | FeSO <sub>4</sub> ·7H <sub>2</sub> O<br>RG | Hb reg | SC <sup>1</sup> | SP – 7<br>mg/kg  | 5 – 20             | Fritz et al.,<br>1970 [81]    |
| Ferrous sulfate,<br>encapsulated                                | 97                               |  | FeSO <sub>4</sub> ·7H <sub>2</sub> O<br>RG | Hb reg | SC <sup>1</sup> | SP – 7<br>mg/kg  | 5 – 20             | Pla et al., 1973<br>[95]      |
| Ferrous tartrate                                                | 77 (70<br>– 83) <sup>2</sup>     |  | FeSO <sub>4</sub> ·7H <sub>2</sub> O<br>RG | Hb reg | SC <sup>1</sup> | SP – 7<br>mg/kg  | 5 – 20             | Fritz et al.,<br>1970 [81]    |

|                                                                      |                                  |  |                                            |        |                 |                 |        |                                           |
|----------------------------------------------------------------------|----------------------------------|--|--------------------------------------------|--------|-----------------|-----------------|--------|-------------------------------------------|
| Fishmeal (700 mg/kg Fe AD)                                           | 32                               |  | FeSO <sub>4</sub> ·7H <sub>2</sub> O<br>RG | Hb reg | SC <sup>1</sup> | P               | 5 – 15 | Chausow and Czarnecki-Maulden, 1988b [77] |
| Fish protein concentrate                                             | 22                               |  | FeSO <sub>4</sub> ·7H <sub>2</sub> O<br>RG | Hb reg | SC <sup>1</sup> | SP – 7<br>mg/kg | 5 – 20 | Fritz et al., 1970 [81]                   |
| Hemoglobin                                                           | 70                               |  | FeSO <sub>4</sub> ·7H <sub>2</sub> O<br>RG | Hb reg | SR              | P < 7<br>mg/kg  | 5 – 40 | Amine et al., 1972 [88]                   |
| Hemoglobin, bovine                                                   | 44                               |  | FeSO <sub>4</sub> ·7H <sub>2</sub> O<br>RG | Hb reg | SC <sup>1</sup> | SP – 7<br>mg/kg | 5 – 20 | Pla et al., 1973 [95]                     |
| Iron, reduced (97.0 % Fe)                                            | 64                               |  | FeSO <sub>4</sub> ·7H <sub>2</sub> O<br>RG | Hb reg | SR              | P – 7<br>mg/kg  | 5 – 40 | Amine et al., 1972 [88]                   |
| Iron, reduced                                                        | 63, 36*                          |  | FeSO <sub>4</sub> ·7H <sub>2</sub> O<br>RG | Hb reg | SR              | P < 7<br>mg/kg  | 5 – 40 | Amine et al., 1972 [88]                   |
| Iron, reduced – 1                                                    | 59, 52*<br>(8 – 66) <sup>2</sup> |  | FeSO <sub>4</sub> ·7H <sub>2</sub> O<br>RG | Hb reg | SC <sup>1</sup> | SP – 7<br>mg/kg | 5 – 20 | Fritz et al., 1970 [81]                   |
| Iron, reduced – 2                                                    | 41                               |  | FeSO <sub>4</sub> ·7H <sub>2</sub> O<br>RG | Hb reg | SC <sup>1</sup> | SP – 7<br>mg/kg | 5 – 20 | Fritz et al., 1970 [81]                   |
| Iron, reduced – 3                                                    | 66                               |  | FeSO <sub>4</sub> ·7H <sub>2</sub> O<br>RG | Hb reg | SC <sup>1</sup> | SP – 7<br>mg/kg | 5 – 20 | Fritz et al., 1970 [81]                   |
| Iron, reduced – 4                                                    | 43                               |  | FeSO <sub>4</sub> ·7H <sub>2</sub> O<br>RG | Hb reg | SC <sup>1</sup> | SP – 7<br>mg/kg | 5 – 20 | Fritz et al., 1970 [81]                   |
| Iron, reduced (97.0 %)                                               | 18, 46*                          |  | FeSO <sub>4</sub> ·7H <sub>2</sub> O<br>RG | Hb reg | SC <sup>1</sup> | SP – 7<br>mg/kg | 5 – 20 | Pla and Fritz, 1971 [89]                  |
| Iron, reduced – 1, 90 % < 10 µm                                      | 61                               |  | FeSO <sub>4</sub> ·7H <sub>2</sub> O<br>RG | Hb reg | SC <sup>1</sup> | SP – 7<br>mg/kg | 5 – 20 | Pla et al., 1973 [95]                     |
| Iron, reduced – 2, 90 % < 10 µm                                      | 53                               |  | FeSO <sub>4</sub> ·7H <sub>2</sub> O<br>RG | Hb reg | SC <sup>1</sup> | SP – 7<br>mg/kg | 5 – 20 | Pla et al., 1973 [95]                     |
| Iron, reduced – 3, 90 % < 10 µm                                      | 60                               |  | FeSO <sub>4</sub> ·7H <sub>2</sub> O<br>RG | Hb reg | SC <sup>1</sup> | SP – 7<br>mg/kg | 5 – 20 | Pla et al., 1973 [95]                     |
| Iron, reduced – 4, 90 % < 10 µm                                      | 44                               |  | FeSO <sub>4</sub> ·7H <sub>2</sub> O<br>RG | Hb reg | SC <sup>1</sup> | SP – 7<br>mg/kg | 5 – 20 | Pla et al., 1973 [95]                     |
| Iron, reduced – 5, 90 % < 10 µm                                      | 48                               |  | FeSO <sub>4</sub> ·7H <sub>2</sub> O<br>RG | Hb reg | SC <sup>1</sup> | SP – 7<br>mg/kg | 5 – 20 | Pla et al., 1973 [95]                     |
| Iron, reduced – 6, 95 % < 5 µm                                       | 51                               |  | FeSO <sub>4</sub> ·7H <sub>2</sub> O<br>RG | Hb reg | SC <sup>1</sup> | SP – 7<br>mg/kg | 5 – 20 | Pla et al., 1973 [95]                     |
| Iron, reduced – 7, 40 % < 10 µm; 1 % < 40 µm; electrolytic reduction | 46                               |  | FeSO <sub>4</sub> ·7H <sub>2</sub> O<br>RG | Hb reg | SC <sup>1</sup> | SP – 7<br>mg/kg | 5 – 20 | Pla et al., 1973 [95]                     |

|                                                                  |    |  |                                            |        |                 |                 |                    |                                                     |
|------------------------------------------------------------------|----|--|--------------------------------------------|--------|-----------------|-----------------|--------------------|-----------------------------------------------------|
| Iron, reduced – 8, 3 % < 10 µm; 21 % < 40 µm; hydrogen reduction | 44 |  | FeSO <sub>4</sub> ·7H <sub>2</sub> O<br>RG | Hb reg | SC <sup>1</sup> | SP – 7<br>mg/kg | 5 – 20             | Pla et al., 1973<br>[95]                            |
| Iron, reduced – 9, 35 % < 32 µm; carbon monoxide reduction       | 42 |  | FeSO <sub>4</sub> ·7H <sub>2</sub> O<br>RG | Hb reg | SC <sup>1</sup> | SP – 7<br>mg/kg | 5 – 20             | Pla et al., 1973<br>[95]                            |
| Iron, reduced – 9, > 32 µm                                       | 41 |  | FeSO <sub>4</sub> ·7H <sub>2</sub> O<br>RG | Hb reg | SC <sup>1</sup> | SP – 7<br>mg/kg | 5 – 20             | Pla et al., 1973<br>[95]                            |
| Iron, reduced – 10, 77 % < 32 µm; electrolyte reduction          | 46 |  | FeSO <sub>4</sub> ·7H <sub>2</sub> O<br>RG | Hb reg | SC <sup>1</sup> | SP – 7<br>mg/kg | 5 – 20             | Pla et al., 1973<br>[95]                            |
| Iron, reduced – 10, > 32 µm                                      | 59 |  | FeSO <sub>4</sub> ·7H <sub>2</sub> O<br>RG | Hb reg | SC <sup>1</sup> | SP – 7<br>mg/kg | 5 – 20             | Pla et al., 1973<br>[95]                            |
| Iron, reduced – 11, 59 % < 32 µm; hydrogen reduction             | 56 |  | FeSO <sub>4</sub> ·7H <sub>2</sub> O<br>RG | Hb reg | SC <sup>1</sup> | SP – 7<br>mg/kg | 5 – 20             | Pla et al., 1973<br>[95]                            |
| Iron, reduced – 11, > 32 µm                                      | 49 |  | FeSO <sub>4</sub> ·7H <sub>2</sub> O<br>RG | Hb reg | SC <sup>1</sup> | SP – 7<br>mg/kg | 5 – 20             | Pla et al., 1973<br>[95]                            |
| Iron, reduced – 12, < 44 µm; electrolyte reduction               | 66 |  | FeSO <sub>4</sub> ·7H <sub>2</sub> O<br>RG | Hb reg | SC <sup>1</sup> | SP – 7<br>mg/kg | 5 – 20             | Pla et al., 1973<br>[95]                            |
| Iron, reduced – 13, RG; electrolyte reduction                    | 59 |  | FeSO <sub>4</sub> ·7H <sub>2</sub> O<br>RG | Hb reg | SC <sup>1</sup> | SP – 7<br>mg/kg | 5 – 20             | Pla et al., 1973<br>[95]                            |
| Iron, reduced – 14, < 149 µm; hydrogen reduction                 | 55 |  | FeSO <sub>4</sub> ·7H <sub>2</sub> O<br>RG | Hb reg | SC <sup>1</sup> | SP – 7<br>mg/kg | 5 – 20             | Pla et al., 1973<br>[95]                            |
| Limestone                                                        | 52 |  | FeSO <sub>4</sub> ·7H <sub>2</sub> O<br>RG | Hb reg | SC              | P – 5<br>mg/kg  | 5 – 20             | Deming and<br>Czarnecki-<br>Maulden, 1989<br>[82]   |
| Limestone, dolomitic                                             | 34 |  | FeSO <sub>4</sub> ·7H <sub>2</sub> O<br>RG | Hb reg | SC              | P – 5<br>mg/kg  | 5 – 20             | Deming and<br>Czarnecki-<br>Maulden, 1989<br>[82]   |
| Meat and bone meal<br>(575 mg/kg Fe AD)                          | 48 |  | FeSO <sub>4</sub> ·7H <sub>2</sub> O<br>RG | Hb reg | SC              | P               | 5 – 15             | Chausow and<br>Czarnecki-<br>Maulden,<br>1988b [77] |
| Mono-dicalcium<br>phosphate                                      | 67 |  | FeSO <sub>4</sub> ·7H <sub>2</sub> O<br>RG | Hb reg |                 |                 | 7.5, 15.0,<br>22.5 | Henry et al.,<br>1992 [84]                          |
| Oat flour                                                        | 21 |  | FeSO <sub>4</sub> ·7H <sub>2</sub> O<br>RG | Hb reg | SC <sup>1</sup> | SP – 7<br>mg/kg | 5 – 20             | Fritz et al.,<br>1970 [81]                          |

|                                              |        |  |                                            |        |    |                 |            |                                                     |
|----------------------------------------------|--------|--|--------------------------------------------|--------|----|-----------------|------------|-----------------------------------------------------|
| Oat hulls                                    | 69     |  | Ferrous sulfate                            | Hb reg | SC | P – 10<br>mg/kg |            | Fly et al., 1998<br>[79]                            |
| Orchardgrass                                 | 69     |  | Ferrous sulfate                            | Hb reg | SC | P – 10<br>mg/kg |            | Fly et al., 1998<br>[79]                            |
| Oystershell                                  | 10     |  | FeSO <sub>4</sub> ·7H <sub>2</sub> O<br>RG | Hb reg | SC | P – 5<br>mg/kg  | 5 – 20     | Deming and<br>Czarnecki-<br>Maulden, 1989<br>[82]   |
| Phosphate,<br>defluorinated                  | 48     |  | FeSO <sub>4</sub> ·7H <sub>2</sub> O<br>RG | Hb reg | SR | P – 4<br>mg/kg  | 7.5 – 22.5 | Ammerman et<br>al., 1993 [94]                       |
| Phosphate,<br>defluorinated                  | 44     |  | FeSO <sub>4</sub> ·7H <sub>2</sub> O<br>RG | Hb reg | SC | P – 5<br>mg/kg  | 5 – 20     | Deming and<br>Czarnecki-<br>Maulden, 1989<br>[82]   |
| Phosphate, dicalcium                         | 55     |  | FeSO <sub>4</sub> ·7H <sub>2</sub> O<br>RG | Hb reg | SC | P – 5<br>mg/kg  | 5 – 20     | Deming and<br>Czarnecki-<br>Maulden, 1989<br>[82]   |
| Phosphate,<br>monocalcium                    | 61     |  | FeSO <sub>4</sub> ·7H <sub>2</sub> O<br>RG | Hb reg | SC | P – 5<br>mg/kg  | 5 – 20     | Deming and<br>Czarnecki-<br>Maulden, 1989<br>[82]   |
| Phosphate,<br>monocalcium/dicalcium          | 66     |  | FeSO <sub>4</sub> ·7H <sub>2</sub> O<br>RG | Hb reg | SR | P – 4<br>mg/kg  | 7.5 – 22.5 | Ammerman et<br>al., 1993 [94]                       |
| Phosphate, soft rock                         | 0      |  | FeSO <sub>4</sub> ·7H <sub>2</sub> O<br>RG | Hb reg | SC | P – 5<br>mg/kg  | 5 – 20     | Deming and<br>Czarnecki-<br>Maulden, 1989<br>[82]   |
| Pork liver (Barrow, Gilt)                    | 46, 32 |  | FeSO <sub>4</sub> ·7H <sub>2</sub> O       | Hb reg | SR | P - 47          | 18 - 20    | Aoyagi et al.,<br>1995 [96]                         |
| Poultry by-product<br>meal (630 mg/kg Fe AD) | 68     |  | FeSO <sub>4</sub> ·7H <sub>2</sub> O<br>RG | Hb reg | SC | P               | 5 – 15     | Chausow and<br>Czarnecki-<br>Maulden,<br>1988b [77] |
| Psyllium husk, 5 % of<br>diet                | 0      |  |                                            | Hb reg | SR | P – 10<br>mg/kg |            | Fly et al., 1998<br>[79]                            |
| Rice, bran (120 mg/kg Fe<br>AD)              | 77     |  | FeSO <sub>4</sub> ·7H <sub>2</sub> O       | Hb reg | SC | P               | 10 – 20    | Chausow and<br>Czarnecki-<br>Maulden,<br>1988b [77] |
| Sesame seed meal (120<br>mg/kg Fe AD)        | 96     |  | FeSO <sub>4</sub> ·7H <sub>2</sub> O       | Hb reg | SC | P               | 10 – 20    | Chausow and<br>Czarnecki-                           |

|                                       |                               |  |                                            |        |                 |                 |            |                                           |
|---------------------------------------|-------------------------------|--|--------------------------------------------|--------|-----------------|-----------------|------------|-------------------------------------------|
|                                       |                               |  |                                            |        |                 |                 |            | Maulden, 1988b [77]                       |
| Sequestered Iron, A, B, C             | 106*, 100, 104, 104           |  | Ferrous sulfate                            | Hb reg | SC              | N               | 5 – 20     | McNaughton et al., 1974 [30]              |
| Sodium iron pyrophosphate (14.5 % Fe) | 30                            |  | FeSO <sub>4</sub> ·7H <sub>2</sub> O<br>RG | Hb reg | SR              | P < 7<br>mg/kg  | 10, 20, 40 | Amine et al., 1972 [88]                   |
| Sodium iron pyrophosphate             | 14, 22*                       |  | FeSO <sub>4</sub> ·7H <sub>2</sub> O<br>RG | Hb reg | SR              | P < 7<br>mg/kg  | 5 – 40     | Amine et al., 1972 [88]                   |
| Sodium iron pyrophosphate             | 2<br>(2 – 23) <sup>2</sup>    |  | FeSO <sub>4</sub> ·7H <sub>2</sub> O<br>RG | Hb reg | SC <sup>1</sup> | SP – 7<br>mg/kg | 5 – 20     | Fritz et al., 1970 [81]                   |
| Sodium iron pyrophosphate             | 13, 8*                        |  | FeSO <sub>4</sub> ·7H <sub>2</sub> O<br>RG | Hb reg | SC <sup>1</sup> | SP – 7<br>mg/kg | 5 – 20     | Fritz et al., 1970 [81]                   |
| Sodium iron pyrophosphate (14.5 % Fe) | 13, 13*                       |  | FeSO <sub>4</sub> ·7H <sub>2</sub> O<br>RG | Hb reg | SC <sup>1</sup> | SP – 7<br>mg/kg | 5 – 20     | Pla and Fritz, 1971 [89]                  |
| Sodium iron pyrophosphate             | 12                            |  | FeSO <sub>4</sub> ·7H <sub>2</sub> O<br>RG | Hb reg | SC <sup>1</sup> | SP              | 5 – 20     | Pla and Fritz, 1970 [80]                  |
| Sodium iron pyrophosphate             | 5*                            |  | Ferrous sulfate                            | Hb reg |                 |                 |            | Pennell et al., 1976 [90]                 |
| Soybeans (heated to 140 °C)           | 90                            |  | FeSO <sub>4</sub> ·7H <sub>2</sub> O<br>RG | Hb reg | SC <sup>1</sup> | SP – 7<br>mg/kg | 5 – 20     | Pla et al., 1973 [95]                     |
| Soybeans (heated to 170 °C)           | 77                            |  | FeSO <sub>4</sub> ·7H <sub>2</sub> O<br>RG | Hb reg | SC <sup>1</sup> | SP – 7<br>mg/kg | 5 – 20     | Pla et al., 1973 [95]                     |
| Soybean meal (345 mg/kg Fe AD)        | 45                            |  | FeSO <sub>4</sub> ·7H <sub>2</sub> O<br>RG | Hb reg | SC              | P               | 10 – 20    | Chausow and Czarnecki-Maulden, 1988b [77] |
| Soybean meal                          | 39                            |  |                                            |        |                 |                 |            | Biehl et al., 1997 [97]                   |
| Soybean hulls                         | 94                            |  | Ferrous sulfate                            | Hb reg | SC              | P – 10<br>mg/kg |            | Fly et al., 1998 [79]                     |
| Soybean protein isolate               | 97<br>(70 – 125) <sup>2</sup> |  | FeSO <sub>4</sub> ·7H <sub>2</sub> O<br>RG | Hb reg | SC <sup>1</sup> | P – 7<br>mg/kg  | 5 – 20     | Fritz et al., 1970 [81]                   |
| Tomato pomace                         | 82                            |  | Ferrous sulfate                            | Hb reg | SC              | P – 10<br>mg/kg |            | Fly et al., 1998 [79]                     |
| Wheat germ                            | 53                            |  | FeSO <sub>4</sub> ·7H <sub>2</sub> O<br>RG | Hb reg | SC <sup>1</sup> | P – 7<br>mg/kg  | 5 – 20     | Fritz et al., 1970 [81]                   |

|                                                                  |                        |  |                                            |        |                 |                  |        |                             |
|------------------------------------------------------------------|------------------------|--|--------------------------------------------|--------|-----------------|------------------|--------|-----------------------------|
| Wheat germ meal                                                  | 54                     |  | FeSO <sub>4</sub> ·7H <sub>2</sub> O<br>RG | Hb reg | SC <sup>1</sup> | SP               | 5 – 20 | Pla and Fritz,<br>1970 [80] |
| Zn-FeSO <sub>4</sub> ·H <sub>2</sub> O (20.2 %<br>Zn, 14.2 % Fe) | 96* <sup>3</sup><br>93 |  | Ferrous sulfate                            | Hb reg | SR              | SP – 20<br>mg/kg | 10, 20 | Boling et al.,<br>1998 [83] |

AD = air – dried; Hb = hemoglobin; reg = regeneration; SC = standard curve; SR = slope ratio; P = purified; SP = semi-purified; N = natural; Liv = liver; Kid = kidney; RG = reagent grade; FG = feed grade; Met = methionine; Prot = proteinate; SDH = succinate dehydrogenase; mRNA = messenger ribonucleic acid; (W) = weak; (M) = moderate; (ES) = exceptionally strong; MR = mean ratio; TP = three-point; EDTA = ethylenediaminetetraacetate

<sup>1</sup> RV = 100 × (mg/kg Fe from standard / mg/kg from test source to give equal curative effect).

<sup>2</sup> Values in brackets represent author values where more than one availability test was made and reflects variation both between samples and between repeated determinations on the same sample

<sup>3</sup> Recalculated using ferrous sulfate monohydrate as a reference

<sup>4</sup> Authors state proper conclusion is that this value is equivalent rather than greater than the Fe present in the feed-grade ferrous sulfate after additional analyses

<sup>5</sup> Fe Prot. (M) in the Zhang et al. study is the same as that used in the Ma et al. study but its bioavailability value relative to FeSO<sub>4</sub>·7H<sub>2</sub>O is about 40 % lower in the Ma et al. study (116 % vs. 154 %) with authors suggesting the difference may be due to the reduced feed intake and inhibited growth and Fe utilisation of broilers fed a purified casein-dextrose diet in the Ma study.

**Table S7. Sheep**

| Source              | RV, %            | Standard                                | Response Criterion | Method Calculation | Type diet    | Added level, mg/kg | Reference                        |
|---------------------|------------------|-----------------------------------------|--------------------|--------------------|--------------|--------------------|----------------------------------|
| Ferrous carbonate A | 55 (40, 112, 13) | FeSO <sub>4</sub> ·7H <sub>2</sub> O FG | Liv, Kid, spl      | SR                 | N – 90 mg/kg | 600                | Van Ravenswaay et al., 2001 [98] |
| Ferrous carbonate B | 0 (0, 0, 1)      | FeSO <sub>4</sub> ·7H <sub>2</sub> O FG | Liv, Kid, spl      | SR                 | N – 90 mg/kg | 600                | Van Ravenswaay et al., 2001 [98] |
| Ferrous carbonate C | 20 (13, 18, 29)  | FeSO <sub>4</sub> ·7H <sub>2</sub> O FG | Liv, Kid, spl      | SR                 | N – 90 mg/kg | 600                | Van Ravenswaay et al., 2001 [98] |

N = natural; Liv = liver; Kid = kidney; Spl = spleen; FG = feed grade; SR = slope ratio

**Table S8. Swine**

| Source                  | RV, %     | Standard                             | Response Criterion | Method Calculation | Type diet    | Added level, mg/kg | Reference                 |
|-------------------------|-----------|--------------------------------------|--------------------|--------------------|--------------|--------------------|---------------------------|
| Ferric ammonium citrate | 102, 102* | Ferrous sulfate                      | Hb                 | TP                 | P – 39 mg/kg | 88                 | Harmon et al., 1967 [99]  |
| Ferric choline citrate  | 144, 118* | FeSO <sub>4</sub> ·7H <sub>2</sub> O | Hb reg             | SC                 | N            | 50, 100            | Miller et al., 1981 [100] |

|                                                       |                             |                                         |        |    |                   |                           |                             |
|-------------------------------------------------------|-----------------------------|-----------------------------------------|--------|----|-------------------|---------------------------|-----------------------------|
| Ferric citrate                                        | 89                          | FeSO <sub>4</sub> ·7H <sub>2</sub> O    | Hb     | MR | N                 | 176 mg/day                | Ullrey et al., 1973 [101]   |
| Ferric citrate                                        | 192                         | FeSO <sub>4</sub> ·7H <sub>2</sub> O    | Liv Fe | MR | N                 | 176 mg/day                | Ullrey et al., 1973 [101]   |
| Ferric citrate                                        | 190                         | FeSO <sub>4</sub> ·7H <sub>2</sub> O    | Hb     | MR | N                 | 176 mg/day                | Ullrey et al., 1973 [101]   |
| Ferric citrate                                        | 125, 114*                   | FeSO <sub>4</sub> ·7H <sub>2</sub> O    | Liv Fe | MR | N                 | 176 mg/day<br>100 mg/kg * | Ullrey et al., 1973 [101]   |
| Ferric copper, cobalt choline citrate                 | 144, 114*                   | FeSO <sub>4</sub> ·7H <sub>2</sub> O    | Hb reg | SC | N                 | 50, 100                   | Miller et al., 1981 [100]   |
| Ferric oxide RG Fe <sub>2</sub> O <sub>3</sub>        | 12                          | FeSO <sub>4</sub> ·7H <sub>2</sub> O RG | Hb     | TP | SP – 15 mg/kg     | 35 – 65                   | Pickett et al., 1961 [102]  |
| Ferric polyphosphate                                  | 84, 91*                     | FeSO <sub>4</sub> ·7H <sub>2</sub> O    | Hb     | TP | P – 8 mg/kg       | 64 – 69                   | Anderson et al., 1974 [103] |
| Ferrous carbonate (40 % Fe)                           | 22, 98*                     | FeSO <sub>4</sub> ·7H <sub>2</sub> O    | Hb     | TP | N                 |                           | Poitevint, 1979 [92]        |
| Ferrous carbonate FG-A                                | 97                          | Ferrous sulfate RG                      | Hb reg | MR | N – 61 mg/kg      | 40                        | Ammerman et al., 1974 [104] |
| Ferrous carbonate FG-B                                | 87, 81*                     | Ferrous sulfate RG                      | Hb reg | MR | N – 61 mg/kg      | 40                        | Ammerman et al., 1974 [104] |
| Ferrous carbonate FG-C                                | 101                         | Ferrous sulfate RG                      | Hb reg | MR | N – 61 mg/kg      | 40                        | Ammerman et al., 1974 [104] |
| Ferrous carbonate FG-A – Exp. 1                       | 74                          | Ferrous sulfate RG                      | Hb reg | TP | N – 61 mg/kg      | 40                        | Ammerman et al., 1974 [104] |
| Ferrous carbonate FG-B – Exp. 1                       | 40                          | Ferrous sulfate RG                      | Hb reg | TP | N – 61 mg/kg      | 40                        | Ammerman et al., 1974 [104] |
| Ferrous carbonate FG-C – Exp. 1                       | 34                          | Ferrous sulfate RG                      | Hb reg | TP | N – 61 mg/kg      | 40                        | Ammerman et al., 1974 [104] |
| Ferrous carbonate FG-A – Exp. 2                       | 45, 95, 55, 66 <sup>1</sup> | Ferrous sulfate RG                      | Hb reg | MR | N – 23 mg/kg      | 80                        | Ammerman et al., 1974 [104] |
| Ferrous carbonate FG-B – Exp. 2                       | 30, 97, 40, 56 <sup>1</sup> | Ferrous sulfate RG                      | Hb reg | MR | N – 23 mg/kg      | 80                        | Ammerman et al., 1974 [104] |
| Ferrous carbonate FG-C – Exp. 2                       | 20, 85, 25, 42 <sup>1</sup> | Ferrous sulfate RG                      | Hb reg | MR | N – 23 mg/kg      | 80                        | Ammerman et al., 1974 [104] |
| Ferrous carbonate                                     | 8, 74*                      | Ferrous sulfate                         | Hb reg | TP | P – 12 – 34 mg/kg | 36 – 51                   | Harmon et al., 1969 [105]   |
| Ferrous carbonate – 1                                 | 13                          | FeSO <sub>4</sub> ·7H <sub>2</sub> O RG | Hb     | TP | SP – 15 mg/kg     | 35 – 65                   | Pickett et al., 1961 [102]  |
| Ferrous carbonate – 2                                 | 16                          | FeSO <sub>4</sub> ·7H <sub>2</sub> O RG | Hb     | TP | SP – 15 mg/kg     | 35 – 65                   | Pickett et al., 1961 [102]  |
| Ferrous sulfate (FeSO <sub>4</sub> ·H <sub>2</sub> O) | 87, 99*                     | FeSO <sub>4</sub> ·7H <sub>2</sub> O    | Hb reg | SR | N – 56 mg/kg      | 50, 100                   | Miller, 1978 [106]          |

|                                                          |         |                                      |                       |    |                  |           |                                |
|----------------------------------------------------------|---------|--------------------------------------|-----------------------|----|------------------|-----------|--------------------------------|
| Ferrous sulfate<br>(FeSO <sub>4</sub> ·H <sub>2</sub> O) | 101*    | FeSO <sub>4</sub> ·7H <sub>2</sub> O | Hb                    | TP | N                | 320 – 360 | Poitevint, 1979<br>[92]        |
| Fe methionine                                            | 103     | FeSO <sub>4</sub> ·7H <sub>2</sub> O | Erythrocyte<br>counts |    |                  |           | Kuznetsov,<br>1987 [107]       |
| Iron EDTA,<br>disodium                                   | 90, 91* | FeSO <sub>4</sub> ·7H <sub>2</sub> O | Hb                    | TP | P – 8<br>mg/kg   | 64 – 68   | Anderson et al.,<br>1974 [103] |
| Iron – methionine                                        | 183     | Ferrous sulfate                      | Hb                    | TP |                  | 200 mg    | Spears et al.,<br>1992 [108]   |
| Iron – methionine                                        | 81      | Ferrous sulfate                      | Growth                |    |                  |           | Lewis et al.,<br>1996 [109]    |
| Iron – methionine                                        | 68      | Ferrous sulfate                      | Hb                    |    |                  |           | Lewis et al.,<br>1996 [109]    |
| Iron – proteinate                                        | 123     | FeSO <sub>4</sub> ·7H <sub>2</sub> O | Hb                    | TP | N                | 500       | Brady et al.,<br>1978 [110]    |
| Iron, reduced<br>catalytic                               | 27, 78* | FeSO <sub>4</sub> ·7H <sub>2</sub> O | Hb                    | TP | P – 8<br>mg/kg   | 64 – 69   | Anderson et al.,<br>1974 [103] |
| Iron, reduced<br>electrolytic                            | 63, 86* | FeSO <sub>4</sub> ·7H <sub>2</sub> O | Hb                    | TP | P – 8<br>mg/kg   | 64 – 69   | Anderson et al.,<br>1974 [103] |
| Humic substances<br>(8,700 mg/kg Fe)                     | 71      | FeSO <sub>4</sub>                    | RBC                   | SR | N – 27<br>mg/kg  | 70        | Kim et al., 2004<br>[111]      |
| Phosphate,<br>defluorinated                              | 35      | Ferrous sulfate                      | Hb                    | TP | SP – 20<br>mg/kg | 70 – 125  | Kornegay, 1972<br>[112]        |
| Phosphate,<br>defluorinated                              | 73      | Ferrous sulfate                      | Liv Fe                | TP | SP – 20<br>mg/kg | 70 – 125  | Kornegay, 1972<br>[112]        |
| Sodium iron<br>pyrophosphate                             | 29, 81* | FeSO <sub>4</sub> ·7H <sub>2</sub> O | Spl Fe                | TP | P – 8<br>mg/kg   | 64 – 69   | Anderson et al.,<br>1974 [103] |

Hb = hemoglobin; reg = regeneration; TP = three-point; SC = standard curve; MR = mean ratio; SR = slope ratio; P = purified; SP = semi-purified; N = natural; Liv = liver; Kid = kidney; Spl = spleen; RG = reagent grade; FG = feed grade; EDTA = ethylenediaminetetraacetate; RBC = red blood cells

<sup>1</sup> Variation in the Ammerman et al. values show how data from one experiment can provide bioavailability estimates which vary widely depending on the calculations used (Van Ravenswaay et al., 2001)

## MANGANESE

### Individual species tables for relative bioavailability of supplemental manganese sources

Table S9. Poultry

| Source | RV, % | Q <sub>f</sub> | Standard | Response<br>Criterion | Method<br>Calculation | Type<br>diet | Added<br>level,<br>mg/kg | Reference |
|--------|-------|----------------|----------|-----------------------|-----------------------|--------------|--------------------------|-----------|
|--------|-------|----------------|----------|-----------------------|-----------------------|--------------|--------------------------|-----------|



|                                                                          |             |  |                                         |                 |    |               |                  |                                |
|--------------------------------------------------------------------------|-------------|--|-----------------------------------------|-----------------|----|---------------|------------------|--------------------------------|
| Hausmannite (Mn <sub>3</sub> O <sub>4</sub> )                            | 97          |  | MnSO <sub>4</sub> ·2H <sub>2</sub> O    | Growth          | MR | N – 11 mg/kg  | 20, 30           | Schaible et al., 1938 [113]    |
| KmnO <sub>4</sub> RG                                                     | 94          |  | MnSO <sub>4</sub> ·4H <sub>2</sub> O RG | Growth          | MR | N – 10 mg/kg  | 50               | Gallup and Norris, 1939 [114]  |
| Manganese carbonate (MnCO <sub>3</sub> )                                 | 101         |  | MnSO <sub>4</sub> ·2H <sub>2</sub> O    | Growth          | MR | N – 11 mg/kg  | 20, 30           | Schaible et al., 1938 [113]    |
| Manganese dioxide (MnO <sub>2</sub> )                                    | 106         |  | MnSO <sub>4</sub> ·2H <sub>2</sub> O    | Growth          | MR | N – 11 mg/kg  | 20, 30           | Schaible et al., 1938 [113]    |
| Manganese hematite                                                       | 104         |  | MnSO <sub>4</sub> ·2H <sub>2</sub> O    | Growth          | MR | N – 11 mg/kg  | 20, 30           | Schaible et al., 1938 [113]    |
| Manganese – methionine                                                   | 111         |  | MnO                                     | Bone Mn         | MR | N             | 30, 60, 200      | Scheideler, 1991 [115]         |
| Manganese – methionine                                                   | 101         |  | MnO                                     | Liv Mn          | MR | N             | 30, 60, 200      | Scheideler, 1991 [115]         |
| Manganese – methionine (16 % Mn)                                         | 130         |  | MnO FG                                  | Bone Mn         | SR | P – 1.4 mg/kg | 13 – 1285        | Fly et al., 1989 [116]         |
| Manganese – methionine                                                   | 174         |  | MnO FG                                  | Bone Mn         | SR | P + 10 % N    | 13 – 1285        | Fly et al., 1989 [116]         |
| Manganese – methionine (16 % Mn)                                         | 108, 101*   |  | MnSO <sub>4</sub> ·H <sub>2</sub> O     | Bone Mn         | SR | N – 93 mg/kg  | 700, 1400, 2100  | Henry et al., 1989 [117]       |
| Manganese – methionine                                                   | 132         |  | MnSO <sub>4</sub> ·H <sub>2</sub> O     | Kid Mn          | SR | N – 93 mg/kg  | 700, 1400, 2100  | Henry et al., 1989 [117]       |
| Manganese monoxide RG (MnO) (76.7 % Mn)                                  | 60, 66, 81* |  | MnSO <sub>4</sub> ·H <sub>2</sub> O     | Bone Mn         | SR | N – 116 mg/kg | 1000, 2000, 4000 | Black et al., 1984 [118]       |
| Manganese oxide FG (MnO + Mn <sub>3</sub> O <sub>4</sub> )               | 103         |  | MnSO <sub>4</sub> ·H <sub>2</sub> O RG  | Bone Mn         | MR | P – 4 mg/kg   | 10, 20           | Watson et al., 1970 [119]      |
| Manganese oxide FG (MnO + Mn <sub>3</sub> O <sub>4</sub> )               | 98          |  | MnSO <sub>4</sub> ·H <sub>2</sub> O RG  | PI <sup>1</sup> | MR | P – 4 mg/kg   | 10, 20           | Watson et al., 1970 [119]      |
| Manganese oxide FG (MnO + Mn <sub>3</sub> O <sub>4</sub> )               | 70          |  | MnSO <sub>4</sub> ·H <sub>2</sub> O     | Bone Mn         | SR | N – 82 mg/kg  | 1000, 2000, 3000 | Wong-Valle et al., 1989a [120] |
| Manganese oxide FG (MnO + Mn <sub>3</sub> O <sub>4</sub> )               | 53          |  | MnSO <sub>4</sub> ·H <sub>2</sub> O     | Kid Mn          | SR | N – 82 mg/kg  | 1000, 2000, 3000 | Wong-Valle et al., 1989a [120] |
| Manganese oxide FG (MnO + Mn <sub>2</sub> SiO <sub>4</sub> ) (58.0 % Mn) | 96          |  | MnSO <sub>4</sub> ·H <sub>2</sub> O RG  | Bone Mn         | MR | P – 5 mg/kg   | 10               | Watson et al., 1971 [121]      |

|                                                                                                                                            |             |      |                                        |                  |    |                           |                     |                                    |
|--------------------------------------------------------------------------------------------------------------------------------------------|-------------|------|----------------------------------------|------------------|----|---------------------------|---------------------|------------------------------------|
| Manganese oxide FG<br>(MnO + Mn <sub>2</sub> SiO <sub>4</sub> )                                                                            | 78          |      | MnSO <sub>4</sub> .H <sub>2</sub> O RG | PI <sup>2</sup>  | MR | P – 5<br>mg/kg            | 10                  | Watson et al.,<br>1971 [121]       |
| Manganese oxide FG<br>[ (Fe, Mn) <sub>2</sub> O <sub>3</sub> +<br>Mn <sub>3</sub> O <sub>4</sub> + MnO +<br>MnO <sub>2</sub> ] (57.3 % Mn) | 86          |      | MnSO <sub>4</sub> .H <sub>2</sub> O RG | Bone Mn          | MR | P – 5<br>mg/kg            | 10                  | Watson et al.,<br>1971 [121]       |
| Manganese oxide FG<br>[ (Fe, Mn) <sub>2</sub> O <sub>3</sub> +<br>Mn <sub>3</sub> O <sub>4</sub> + MnO +<br>MnO <sub>2</sub> ]             | 60          |      | MnSO <sub>4</sub> .H <sub>2</sub> O RG | PI <sup>2</sup>  | MR | P – 5<br>mg/kg            | 10                  | Watson et al.,<br>1971 [121]       |
| Manganese –<br>proteinate (10 % Mn)                                                                                                        | 86,<br>101* |      | MnSO <sub>4</sub> .H <sub>2</sub> O    | Bone Mn          | MR | P – 1.4<br>mg/kg          | 1000                | Baker and<br>Halpin, 1987<br>[122] |
| Manganese –<br>proteinate                                                                                                                  | 118         |      | MnSO <sub>4</sub> .H <sub>2</sub> O    | Bile Mn          | MR | P – 1.4<br>mg/kg          | 1000                | Baker and<br>Halpin, 1987<br>[122] |
| Manganese –<br>proteinate                                                                                                                  | 114         |      | MnSO <sub>4</sub> .H <sub>2</sub> O    | Bone Mn          | MR | P + 10 %<br>wheat<br>bran | 1000                | Baker and<br>Halpin, 1987<br>[122] |
| Manganese –<br>proteinate                                                                                                                  | 122         |      | MnSO <sub>4</sub> .H <sub>2</sub> O    | Bile Mn          | MR | P + 10 %<br>wheat<br>bran | 1000                | Baker and<br>Halpin, 1987<br>[122] |
| Manganese<br>proteinate (15 % Mn)                                                                                                          | 117*        |      | MnSO <sub>4</sub> .H <sub>2</sub> O    | Bone Mn          | SR | N – 26<br>mg/kg           | 1000, 2000,<br>3000 | Smith et al.,<br>1995 [123]        |
| Manganese<br>proteinate (21 d)<br>(15 % Mn)                                                                                                | 120         |      | MnSO <sub>4</sub> .H <sub>2</sub> O    | Bone Mn          | SR | N – 26<br>mg/kg           | 1000, 2000,<br>3000 | Smith et al.,<br>1995 [123]        |
| Manganese<br>proteinate (49 d, TN)<br>(15 % Mn)                                                                                            | 125         |      | MnSO <sub>4</sub> .H <sub>2</sub> O    | Bone Mn          | SR | N – 26<br>mg/kg           | 1000, 2000,<br>3000 | Smith et al.,<br>1995 [123]        |
| Manganese<br>proteinate (49 d, HD)<br>(15 % Mn)                                                                                            | 145         |      | MnSO <sub>4</sub> .H <sub>2</sub> O    | Bone Mn          | SR | N – 26<br>mg/kg           | 1000, 2000,<br>3000 | Smith et al.,<br>1995 [123]        |
| Manganese<br>proteinate                                                                                                                    | 86          | 1.45 | MnSO <sub>4</sub> .H <sub>2</sub> O    | Heart            | SR | N – 15                    | 60, 120, 180        | Wang et al.,<br>2012 [124]         |
| Manganese<br>proteinate                                                                                                                    | 95          | 1.45 | MnSO <sub>4</sub> .H <sub>2</sub> O    | MnSOD            | SR | N – 15                    | 60, 120, 180        | Wang et al.,<br>2012 [124]         |
| Manganese<br>proteinate                                                                                                                    | 103         | 1.45 | MnSO <sub>4</sub> .H <sub>2</sub> O    | MnSOD<br>mRNA    | SR | N – 15                    | 60, 120, 180        | Wang et al.,<br>2012 [124]         |
| Manganese<br>proteinate (18.3 %<br>Mn)                                                                                                     | 111         |      | MnSO <sub>4</sub> .H <sub>2</sub> O    | Bone<br>strength | SR | N – 13<br>mg/kg           | 35, 70, 105,<br>140 | Saldanha et al.,<br>2020 [125]     |

|                                                                              |                  |      |                                        |                              |    |                                                |                     |                                |
|------------------------------------------------------------------------------|------------------|------|----------------------------------------|------------------------------|----|------------------------------------------------|---------------------|--------------------------------|
| Manganese<br>proteinate (18.3 %<br>Mn)                                       | 128              |      | MnSO <sub>4</sub> .H <sub>2</sub> O    | Liv Mn                       | SR | N – 13<br>mg/kg                                | 35, 70, 105,<br>140 | Saldanha et al.,<br>2020 [125] |
| Manganese<br>proteinate (18.3 %<br>Mn)                                       | 105              |      | MnSO <sub>4</sub> .H <sub>2</sub> O    | Bone Mn                      | SR | N – 13<br>mg/kg                                | 35, 70, 105,<br>140 | Saldanha et al.,<br>2020 [125] |
| Manganite Mn <sub>2</sub> O <sub>3</sub>                                     | 93               |      | MnSO <sub>4</sub> .2H <sub>2</sub> O   | Growth                       | MR | N – 11<br>mg/kg                                | 20, 30              | Schaible et al.,<br>1938 [113] |
| Manganomanganic<br>oxide FG (Mn <sub>3</sub> O <sub>4</sub> )<br>(36.1 % Mn) | 101              |      | MnSO <sub>4</sub> .H <sub>2</sub> O RG | Bone Mn                      | MR | P – 4<br>mg/kg                                 | 10, 20              | Watson et al.,<br>1970 [119]   |
| Mn <sub>3</sub> O <sub>4</sub> FG                                            | 88               |      | MnSO <sub>4</sub> .H <sub>2</sub> O RG | PI <sup>2</sup>              | MR | P – 4<br>mg/kg                                 | 10, 20              | Watson et al.,<br>1970 [119]   |
| Manganous chloride<br>(MnCl <sub>2</sub> .4H <sub>2</sub> O)                 | 101              |      | MnSO <sub>4</sub> .2H <sub>2</sub> O   | Growth                       | MR | N – 11<br>mg/kg                                | 20, 30              | Schaible et al.,<br>1938 [113] |
| Mn amino acid B                                                              | 96 <sup>3</sup>  | 45.3 | MnSO <sub>4</sub> .H <sub>2</sub> O RG | Bone Mn                      | SR | N – 23<br>mg/kg                                | 60, 120, 180        | Li et al., 2004<br>[126]       |
| Mn amino acid B                                                              | 127 <sup>3</sup> | 45.3 | MnSO <sub>4</sub> .H <sub>2</sub> O RG | Heart                        | SR | N – 23<br>mg/kg                                | 60, 120, 180        | Li et al., 2004<br>[126]       |
| Mn amino acid B                                                              | 133 <sup>3</sup> | 45.3 | MnSO <sub>4</sub> .H <sub>2</sub> O RG | MnSOD<br>mRNA<br>(heart)     | SR | N – 23<br>mg/kg                                | 60, 120, 180        | Li et al., 2004<br>[126]       |
| Mn amino acid B                                                              | 132              |      | MnSO <sub>4</sub> .H <sub>2</sub> O RG | MnSOD<br>mRNA<br>(heart)     | SR |                                                | 60, 120, 180        | Luo et al., 2004<br>[127]      |
| Mn amino acid B<br>(6.48 % Mn)                                               | 102 <sup>3</sup> | 45.3 | MnSO <sub>4</sub> .H <sub>2</sub> O RG | Bone Mn                      | SR | N – 20<br>mg/kg +<br>high Ca<br>(18.5<br>g/kg) | 60, 80, 120         | Li et al., 2005<br>[128]       |
| Mn amino acid B<br>(6.48 % Mn)                                               | 137 <sup>3</sup> | 45.3 | MnSO <sub>4</sub> .H <sub>2</sub> O RG | Heart                        | SR | N – 20<br>mg/kg +<br>high Ca<br>(18.5<br>g/kg) | 60, 80, 120         | Li et al., 2005<br>[128]       |
| Mn amino acid B<br>(6.48 % Mn)                                               | 108 <sup>3</sup> | 45.3 | MnSO <sub>4</sub> .H <sub>2</sub> O RG | MnSOD<br>activity<br>(heart) | SR | N – 20<br>mg/kg +<br>high Ca<br>(18.5<br>g/kg) | 60, 80, 120         | Li et al., 2005<br>[128]       |

|                                                                           |                  |       |                                         |                              |    |                                                |                               |                                    |
|---------------------------------------------------------------------------|------------------|-------|-----------------------------------------|------------------------------|----|------------------------------------------------|-------------------------------|------------------------------------|
| Mn amino acid B<br>(6.48 % Mn)                                            | 145 <sup>3</sup> | 45.3  | MnSO <sub>4</sub> .H <sub>2</sub> O RG  | MnSOD<br>mRNA<br>(heart)     | SR | N – 20<br>mg/kg +<br>high Ca<br>(18.5<br>g/kg) | 60, 80, 120                   | Li et al., 2005<br>[128]           |
| Mn amino acid C                                                           | 93 <sup>3</sup>  | 115.4 | MnSO <sub>4</sub> .H <sub>2</sub> O RG  | Bone Mn                      | SR | N – 23<br>mg/kg                                | 60, 120, 180                  | Li et al., 2004<br>[126]           |
| Mn amino acid C                                                           | 114 <sup>3</sup> | 115.4 | MnSO <sub>4</sub> .H <sub>2</sub> O RG  | Heart                        | SR | N – 23<br>mg/kg                                | 60, 120, 180                  | Li et al., 2004<br>[126]           |
| Mn amino acid C                                                           | 113 <sup>3</sup> | 115.4 | MnSO <sub>4</sub> .H <sub>2</sub> O RG  | MnSOD<br>mRNA<br>(heart)     | SR | N – 23<br>mg/kg                                | 60, 120, 180                  | Li et al., 2004<br>[126]           |
| Mn amino acid C                                                           | 113              |       | MnSO <sub>4</sub> .H <sub>2</sub> O RG  | MnSOD<br>mRNA<br>(heart)     | SR |                                                | 60, 120, 180                  | Luo et al., 2004<br>[127]          |
| Mn amino acid C<br>(7.86 % Mn)                                            | 102 <sup>3</sup> | 115.4 | MnSO <sub>4</sub> .H <sub>2</sub> O RG  | Bone Mn                      | SR | N – 20<br>mg/kg +<br>high Ca<br>(18.5 g/kg)    | 60, 120, 180                  | Li et al., 2005<br>[128]           |
| Mn amino acid C<br>(7.86 % Mn)                                            | 135 <sup>3</sup> | 115.4 | MnSO <sub>4</sub> .H <sub>2</sub> O RG  | Heart                        | SR | N – 20<br>mg/kg +<br>high Ca<br>(18.5 g/kg)    | 60, 120, 180                  | Li et al., 2005<br>[128]           |
| Mn amino acid C<br>(7.86 % Mn)                                            | 120 <sup>3</sup> | 115.4 | MnSO <sub>4</sub> .H <sub>2</sub> O RG  | MnSOD<br>activity<br>(heart) | SR | N – 20<br>mg/kg +<br>high Ca<br>(18.5 g/kg)    | 60, 120, 180                  | Li et al., 2005<br>[128]           |
| Mn amino acid C<br>(7.86 % Mn)                                            | 148 <sup>3</sup> | 115.4 | MnSO <sub>4</sub> .H <sub>2</sub> O RG  | MnSOD<br>mRNA<br>(heart)     | SR | N – 20<br>mg/kg +<br>high Ca<br>(18.5 g/kg)    | 60, 120, 180                  | Li et al., 2005<br>[128]           |
| Mn amino acid<br>chelate                                                  | 84               |       | MnSO <sub>4</sub> .H <sub>2</sub> O RG  | Bone Mn                      | SR | N – 118<br>mg/kg                               | 500, 1000,<br>1500            | Miles et al.,<br>2003 [28]         |
| Mn chelate of 2-<br>hydroxy-<br>4(methylthio)<br>butanoic acid<br>(HMTBa) | 116              |       | MnSO <sub>4</sub> .5H <sub>2</sub> O RG | Bone Mn                      | SR | N                                              | 100, 200,<br>400, 600,<br>800 | Yan and<br>Waldroup,<br>2006 [129] |

|                                                            |                  |     |                                         |                    |    |                                    |                         |                                |
|------------------------------------------------------------|------------------|-----|-----------------------------------------|--------------------|----|------------------------------------|-------------------------|--------------------------------|
| Mn chelate of 2-hydroxy-4(methylthio)butanoic acid (HMTBa) | 154              |     | MnO RG                                  | Bone Mn            | SR | N                                  | 100, 200, 400, 600, 800 | Yan and Waldroup, 2006 [129]   |
| MnCl <sub>2</sub> ·4H <sub>2</sub> O RG                    | 93               |     | MnSO <sub>4</sub> ·4H <sub>2</sub> O RG | Growth             | MR | N – 10 mg/kg                       | 50                      | Gallup and Norris, 1939 [114]  |
| MnCl <sub>2</sub> ·4H <sub>2</sub> O RG                    | 102, 97*         |     | MnSO <sub>4</sub> ·H <sub>2</sub> O RG  | Bile Mn            | SR | N – 168 mg/kg                      | 3000, 4000              | Southern and Baker, 1983 [130] |
| MnCO <sub>3</sub> RG                                       | 94               |     | MnSO <sub>4</sub> ·4H <sub>2</sub> O RG | Growth             | MR | N – 10 mg/kg                       | 50                      | Gallup and Norris, 1939 [114]  |
| MnCO <sub>3</sub> RG (45 % Mn)                             | 93               |     | MnSO <sub>4</sub> ·H <sub>2</sub> O RG  | Bone Mn            | MR |                                    | 10                      | Watson et al., 1971 [121]      |
| MnCO <sub>3</sub> RG                                       | 98               |     | MnSO <sub>4</sub> ·H <sub>2</sub> O RG  | PI <sup>2</sup>    | MR |                                    | 10                      | Watson et al., 1971 [121]      |
| MnCO <sub>3</sub> RG                                       | 77               |     | MnSO <sub>4</sub> ·H <sub>2</sub> O RG  | Bile Mn            | SR | N – 168 mg/kg                      | 3000, 4000              | Southern and Baker, 1983 [130] |
| MnCO <sub>3</sub> RG (47 % Mn)                             | 32, 66*          |     | MnSO <sub>4</sub> ·H <sub>2</sub> O     | Bone Mn            | SR | N – 116 mg/kg                      | 1000, 2000, 4000        | Black et al., 1984 [118]       |
| MnCO <sub>3</sub> RG                                       | 36               |     | MnSO <sub>4</sub> ·H <sub>2</sub> O     | Liv Mn             | SR | N – 116 mg/kg                      | 1000, 2000, 4000        | Black et al., 1984 [118]       |
| Mn methionine E                                            | 99 <sup>3</sup>  | 3.2 | MnSO <sub>4</sub> ·H <sub>2</sub> O RG  | MnSOD mRNA (heart) | SR | P – 23 mg/kg                       | 60, 120, 180            | Li et al., 2004 [126]          |
| Mn methionine E                                            | 95 <sup>3</sup>  | 3.2 | MnSO <sub>4</sub> ·H <sub>2</sub> O RG  | Bone Mn            | SR | P – 23 mg/kg                       | 60, 120, 180            | Li et al., 2004 [126]          |
| Mn methionine E                                            | 110 <sup>3</sup> | 3.2 | MnSO <sub>4</sub> ·H <sub>2</sub> O RG  | Heart              | SR | P – 23 mg/kg                       | 60, 120, 180            | Li et al., 2004 [126]          |
| Mn methionine E                                            | 99               |     | MnSO <sub>4</sub> ·H <sub>2</sub> O RG  | MnSOD mRNA (heart) | SR |                                    | 60, 120, 180            | Luo et al., 2004 [127]         |
| Mn methionine E (8.27 % Mn)                                | 104 <sup>3</sup> | 3.2 | MnSO <sub>4</sub> ·H <sub>2</sub> O RG  | Bone Mn            | SR | N – 20 mg/kg + high Ca (18.5 g/kg) | 60, 120, 180            | Li et al., 2005 [128]          |

|                                |                  |     |                                         |                              |    |                                             |                               |                                      |
|--------------------------------|------------------|-----|-----------------------------------------|------------------------------|----|---------------------------------------------|-------------------------------|--------------------------------------|
| Mn methionine E<br>(8.27 % Mn) | 126 <sup>3</sup> | 3.2 | MnSO <sub>4</sub> .H <sub>2</sub> O RG  | Heart Mn                     | SR | N – 20<br>mg/kg +<br>high Ca<br>(18.5 g/kg) | 60, 120, 180                  | Li et al., 2005<br>[128]             |
| Mn methionine E<br>(8.27 % Mn) | 108 <sup>3</sup> | 3.2 | MnSO <sub>4</sub> .H <sub>2</sub> O RG  | MnSOD<br>activity<br>(heart) | SR | N – 20<br>mg/kg +<br>high Ca<br>(18.5 g/kg) | 60, 120, 180                  | Li et al., 2005<br>[128]             |
| Mn methionine E<br>(8.27 % Mn) | 112 <sup>3</sup> |     | MnSO <sub>4</sub> .H <sub>2</sub> O RG  | MnSOD<br>mRNA<br>(heart)     | SR | N – 20<br>mg/kg +<br>high Ca<br>(18.5 g/kg) | 60, 120, 180                  | Li et al., 2005<br>[128]             |
| MnO RG                         | 77, 79           |     | MnSO <sub>4</sub> .H <sub>2</sub> O     | Liv Mn                       | SR | N – 116<br>mg/kg                            | 1000, 2000,<br>4000           | Black et al.,<br>1984 [118]          |
| MnO                            | 75               |     | MnSO <sub>4</sub> .5H <sub>2</sub> O RG | Bone Mn                      | SR | N                                           | 100, 200,<br>400, 600,<br>800 | Yan and<br>Waldroup,<br>2006 [129]   |
| MnO RG                         | 81, 70*          |     | MnSO <sub>4</sub> .H <sub>2</sub> O     | Bone Mn                      | SR | N – 35<br>mg/kg                             | 40, 80, 120                   | Henry et al.,<br>1986 [131]          |
| MnO RG                         | 46               |     | MnSO <sub>4</sub> .H <sub>2</sub> O     | Kid Mn                       | SR | N – 35<br>mg/kg                             | 40, 80, 120                   | Henry et al.,<br>1986 [131]          |
| MnO RG                         | 70               |     | MnSO <sub>4</sub> .H <sub>2</sub> O     | Liv Mn                       | SR | N – 35<br>mg/kg                             | 40, 80, 120                   | Henry et al.,<br>1986 [131]          |
| MnO RG (73.0 % Mn)             | 82               |     | MnSO <sub>4</sub> .H <sub>2</sub> O     | Bone Mn                      | SR | N – 82<br>mg/kg                             | 1000, 2000,<br>3000           | Wong-Valle et<br>al., 1989a<br>[120] |
| MnO RG                         | 86               |     | MnSO <sub>4</sub> .H <sub>2</sub> O     | Kid Mn                       | SR | N – 82<br>mg/kg                             | 1000, 2000,<br>3000           | Wong-Valle et<br>al., 1989a<br>[120] |
| MnO RG (77.2 % Mn)             | 96, 94*          |     | MnSO <sub>4</sub> .H <sub>2</sub> O     | Bone Mn                      | SR | N – 93<br>mg/kg                             | 700, 1400,<br>2100            | Henry et al.,<br>1989 [117]          |
| MnO RG                         | 86               |     | MnSO <sub>4</sub> .H <sub>2</sub> O     | Kid Mn                       | SR | N – 93<br>mg/kg                             | 700, 1400,<br>2100            | Henry et al.,<br>1989 [117]          |
| MnO FG (14.8 % Mn)             | 82               |     | MnSO <sub>4</sub> .H <sub>2</sub> O RG  | Bone Mn                      | MR | P – 5<br>mg/kg                              | 10                            | Watson et al.,<br>1971 [121]         |
| MnO FG                         | 73               |     | MnSO <sub>4</sub> .H <sub>2</sub> O RG  | PI <sup>2</sup>              | MR | P – 5<br>mg/kg                              | 10                            | Watson et al.,<br>1971 [121]         |
| MnO FG (61.0 % Mn)             | 95               |     | MnSO <sub>4</sub> .H <sub>2</sub> O RG  | Bone Mn                      | MR | P – 5<br>mg/kg                              | 10                            | Watson et al.,<br>1971 [121]         |
| MnO FG                         | 83               |     | MnSO <sub>4</sub> .H <sub>2</sub> O RG  | PI <sup>2</sup>              | MR | P – 5<br>mg/kg                              | 10                            | Watson et al.,<br>1971 [121]         |

|                                    |         |  |                                         |         |    |                  |                      |                                |
|------------------------------------|---------|--|-----------------------------------------|---------|----|------------------|----------------------|--------------------------------|
| MnO FG (64.2 % Mn)                 | 93, 91* |  | MnSO <sub>4</sub> .H <sub>2</sub> O     | Bone Mn | SR | N – 82<br>mg/kg  | 1000, 2000,<br>3000  | Wong-Valle et al., 1989a [120] |
| MnO FG                             | 68      |  | MnSO <sub>4</sub> .H <sub>2</sub> O     | Kid Mn  | SR | N – 82<br>mg/kg  | 1000, 2000,<br>3000  | Wong-Valle et al., 1989a [120] |
| MnO FG (45.6 % Mn)                 | 75      |  | MnSO <sub>4</sub> .H <sub>2</sub> O     | Bone Mn | SR | N – 82<br>mg/kg  | 1000, 2000,<br>3000  | Wong-Valle et al., 1989a [120] |
| MnO FG                             | 52      |  | MnSO <sub>4</sub> .H <sub>2</sub> O     | Kid Mn  | SR | N – 82<br>mg/kg  | 1000, 2000,<br>3000  | Wong-Valle et al., 1989a [120] |
| MnO FG (46 % Mn)                   | 83      |  | MnSO <sub>4</sub> .H <sub>2</sub> O RG  | Bone Mn | SR | N – 22<br>mg/kg  | 50, 100,<br>150, 200 | Luo, 1989 [132]                |
| MnO FG                             | 83      |  | MnSO <sub>4</sub> .H <sub>2</sub> O RG  | Toe Mn  | SR | N – 22<br>mg/kg  | 50, 100,<br>150, 200 | Luo, 1989 [132]                |
| MnO (15 % Mn)                      | 99*     |  | MnSO <sub>4</sub> .H <sub>2</sub> O     | Bone Mn | SR | N – 26<br>mg/kg  | 1000, 2000,<br>3000  | Smith et al., 1995 [123]       |
| MnO (21 d) (15 % Mn)               | 91      |  | MnSO <sub>4</sub> .H <sub>2</sub> O     | Bone Mn | SR | N – 26<br>mg/kg  | 1000, 2000,<br>3000  | Smith et al., 1995 [123]       |
| MnO (49 d, TN) (15 % Mn)           | 83      |  | MnSO <sub>4</sub> .H <sub>2</sub> O     | Bone Mn | SR | N – 26<br>mg/kg  | 1000, 2000,<br>3000  | Smith et al., 1995 [123]       |
| MnO (49 d, HD) (15 % Mn)           | 82      |  | MnSO <sub>4</sub> .H <sub>2</sub> O     | Bone Mn | SR | N – 26<br>mg/kg  | 1000, 2000,<br>3000  | Smith et al., 1995 [123]       |
| MnO                                | 74*     |  | MnSO <sub>4</sub> .H <sub>2</sub> O     | Bone Mn |    |                  | 50                   | Korol et al., 1996 [133]       |
| MnO.Mn <sub>2</sub> O <sub>3</sub> | 68*     |  | MnSO <sub>4</sub> .H <sub>2</sub> O     | Bone Mn |    |                  | 50                   | Korol et al., 1996 [133]       |
| MnO <sub>2</sub> RG                | 95      |  | MnSO <sub>4</sub> .4H <sub>2</sub> O RG | Growth  | MR | N – 10<br>mg/kg  | 50                   | Gallup and Norris, 1939 [114]  |
| MnO <sub>2</sub> RG                | 29      |  | MnSO <sub>4</sub> .H <sub>2</sub> O RG  | Bile Mn | SR | N – 168<br>mg/kg | 3000, 4000           | Southern and Baker, 1983 [130] |
| MnO <sub>2</sub> RG (56.5 % Mn)    | 34, 31* |  | MnO RG (77 % Mn)                        | Bone Mn | SR | N – 102<br>mg/kg | 1000, 2000,<br>3000  | Henry et al., 1987 [134]       |
| MnO <sub>2</sub> RG                | 46      |  | MnO RG                                  | Kid Mn  | SR | N – 102<br>mg/kg | 1000, 2000,<br>3000  | Henry et al., 1987 [134]       |
| MnO <sub>2</sub> FG (36 % Mn)      | 37      |  | MnO RG                                  | Bone Mn | SR | N – 102<br>mg/kg | 1000, 2000,<br>3000  | Henry et al., 1987 [134]       |
| MnO <sub>2</sub> FG                | 44      |  | MnO RG                                  | Kid Mn  | SR | N – 102<br>mg/kg | 1000, 2000,<br>3000  | Henry et al., 1987 [134]       |

|                                             |     |  |                                        |                 |    |              |              |                             |
|---------------------------------------------|-----|--|----------------------------------------|-----------------|----|--------------|--------------|-----------------------------|
| Mn Propionate (high Ca and P diet)          | 139 |  | Mn sulfate FG                          | Bone Mn         | SR | N – 30 mg/kg | 20, 100, 500 | Brooks et al., 2012 [135]   |
| Mn Proteinate                               | 163 |  | MnSO <sub>4</sub> .                    | Liv Mn          | SR |              |              | Ao et al., 2008 [136]       |
| Mn Proteinate                               | 120 |  | MnSO <sub>4</sub> .                    | Bone Mn         | SR |              |              | Ao et al., 2008 [136]       |
| Mn Proteinate                               | 133 |  | MnSO <sub>4</sub>                      | Kid Mn          | SR |              |              | Ao et al., 2008 [136]       |
| Potassium permanganate (KmnO <sub>4</sub> ) | 109 |  | MnSO <sub>4</sub> .2H <sub>2</sub> O   | Growth          | MR | N – 11 mg/kg | 20, 30       | Schaible et al., 1938 [113] |
| Psilomelane                                 | 87  |  | MnSO <sub>4</sub> .2H <sub>2</sub> O   | Growth          | MR | N – 11 mg/kg | 20, 30       | Schaible et al., 1938 [113] |
| Pyrolusite (MnO <sub>2</sub> )              | 81  |  | MnSO <sub>4</sub> .2H <sub>2</sub> O   | Growth          | MR | N – 11 mg/kg | 20, 30       | Schaible et al., 1938 [113] |
| Rhodo-chrosite (MnCO <sub>3</sub> )         | 64  |  | MnSO <sub>4</sub> .2H <sub>2</sub> O   | Growth          | MR | N – 11 mg/kg | 20, 30       | Schaible et al., 1938 [113] |
| Rhodo-chrosite FG (24 % Mn)                 | 80  |  | MnSO <sub>4</sub> .H <sub>2</sub> O RG | Bone Mn         | MR | P – 5 mg/kg  | 10           | Watson et al., 1971 [121]   |
| Rhodo-chrosite FG                           | 39  |  | MnSO <sub>4</sub> .H <sub>2</sub> O RG | PI <sup>2</sup> | MR | P – 5 mg/kg  | 10           | Watson et al., 1971 [121]   |
| Rhodonite                                   | 85  |  | MnSO <sub>4</sub> .2H <sub>2</sub> O   | Growth          | MR | N – 11 mg/kg | 20, 30       | Schaible et al., 1938 [113] |

MR = mean ratio; SR = slope ratio; P = purified; N = natural; Liv = liver; Kid = kidney; PI = perosis index; RG = reagent grade; FG = feed grade; MnSOD = manganese superoxide dismutase activity; mRNA = messenger ribonucleic acid

<sup>1</sup> Value for standard source was  $\leq$  that for unsupplemented control group

<sup>2</sup> Authors provided a leg score of 0 = normal to 4 = swelling and marked slipping of tendon. Relative value calculated as: (Leg score test source – 4) / (leg score standard source – 4) × 100.

<sup>3</sup> Li et al. (2004 & 2005) – 2005 results in high Ca diet show higher RBV implying organic Mn sources with moderate or strong chelation strength offer partial or complete resistance to interference from high dietary calcium during digestion.

**Table S10. Sheep**

| Source                                      | RV, %   | Standard                            | Response Criterion | Method Calculation | Type diet    | Added level, mg/kg | Reference                      |
|---------------------------------------------|---------|-------------------------------------|--------------------|--------------------|--------------|--------------------|--------------------------------|
| Manganese carbonate RG (MnCO <sub>3</sub> ) | 93, 74* | MnO FG                              | Bone Mn            | SR                 | N – 31 mg/kg | 500 – 8000         | Black et al., 1985 [137]       |
| Manganese dioxide RG (MnO <sub>2</sub> )    | 39, 67* | MnSO <sub>4</sub> .H <sub>2</sub> O | Bone Mn            | SR                 | N – 38 mg/kg | 1500, 3000         | Wong-Valle et al., 1989b [138] |



|                                    |                |                                        |         |    |              |                 |                                |
|------------------------------------|----------------|----------------------------------------|---------|----|--------------|-----------------|--------------------------------|
| Manganese – methionine (15.7 % Mn) | 157, 113*, 164 | MnSO <sub>4</sub> .H <sub>2</sub> O RG | Bone Mn | SR | N – 34 mg/kg | 900, 1800, 2700 | Henry et al., 1992 [139]       |
| Manganese – methionine             | 102, 93, 116   | MnSO <sub>4</sub> .H <sub>2</sub> O RG | Kid Mn  | SR | N – 34 mg/kg | 900, 1800, 2700 | Henry et al., 1992 [139]       |
| Manganese – methionine             | 132            | MnSO <sub>4</sub> .H <sub>2</sub> O RG | Bone Mn | SR | N – 32 mg/kg | 900 – 2700      | Henry et al., 1992 [139]       |
| MnCO <sub>3</sub> RG               | 46             | MnO FG                                 | Kid Mn  | SR | N – 31 mg/kg | 500 – 8000      | Black et al., 1985 [137]       |
| MnCO <sub>3</sub> RG               | 23, 61*        | MnSO <sub>4</sub> .H <sub>2</sub> O    | Bone Mn | SR | N – 38 mg/kg | 1500, 3000      | Wong-Valle et al., 1989b [138] |
| MnCO <sub>3</sub> RG               | 20             | MnSO <sub>4</sub> .H <sub>2</sub> O    | Kid Mn  | SR | N – 38 mg/kg | 1500, 3000      | Wong-Valle et al., 1989b [138] |
| MnCO <sub>3</sub> RG               | 40             | MnSO <sub>4</sub> .H <sub>2</sub> O    | Liv Mn  | SR | N – 38 mg/kg | 1500, 3000      | Wong-Valle et al., 1989b [138] |
| MnO RG (73.0 % Mn)                 | 57, 80*        | MnSO <sub>4</sub> .H <sub>2</sub> O    | Bone Mn | SR | N – 38 mg/kg | 1500, 3000      | Wong-Valle et al., 1989b [138] |
| MnO RG                             | 55             | MnSO <sub>4</sub> .H <sub>2</sub> O    | Kid Mn  | SR | N – 38 mg/kg | 1500, 3000      | Wong-Valle et al., 1989b [138] |
| MnO RG                             | 61             | MnSO <sub>4</sub> .H <sub>2</sub> O    | Liv Mn  | SR | N – 38 mg/kg | 1500, 3000      | Wong-Valle et al., 1989b [138] |
| MnO FG (64.2 % Mn)                 | 70, 91*, 67    | MnSO <sub>4</sub> .H <sub>2</sub> O RG | Bone Mn | SR | N – 32 mg/kg | 900 – 2700      | Henry et al., 1992 [139]       |
| MnO FG                             | 75, 55         | MnSO <sub>4</sub> .H <sub>2</sub> O RG | Kid Mn  | SR | N – 32 mg/kg | 900 – 2700      | Henry et al., 1992 [139]       |
| MnO FG (58.1 % Mn)                 | 50, 46         | MnSO <sub>4</sub> .H <sub>2</sub> O RG | Bone Mn | SR | N – 32 mg/kg | 900 – 2700      | Henry et al., 1992 [139]       |
| MnO FG                             | 59, 31         | MnSO <sub>4</sub> .H <sub>2</sub> O RG | Kid Mn  | SR | N – 32 mg/kg | 900 – 2700      | Henry et al., 1992 [139]       |
| MnO <sub>2</sub> RG                | 25             | MnSO <sub>4</sub> .H <sub>2</sub> O    | Kid Mn  | SR | N – 38 mg/kg | 1500, 3000      | Wong-Valle et al., 1989b [138] |
| MnO <sub>2</sub> RG                | 35             | MnSO <sub>4</sub> .H <sub>2</sub> O    | Liv Mn  | SR | N – 38 mg/kg | 1500, 3000      | Wong-Valle et al., 1989b [138] |

SR = slope ratio; N = natural; Liv = liver; Kid = kidney; RG = reagent grade; FG = feed grade

**Table S11. Swine**

| Source | RV, % | Standard | Response Criterion | Method Calculation | Type diet | Added level, mg/kg | Reference |
|--------|-------|----------|--------------------|--------------------|-----------|--------------------|-----------|
|--------|-------|----------|--------------------|--------------------|-----------|--------------------|-----------|

|                     |     |                                     |        |  |  |    |                                 |
|---------------------|-----|-------------------------------------|--------|--|--|----|---------------------------------|
| Manganese carbonate | 95* | MnSO <sub>4</sub> .H <sub>2</sub> O | Mn Abs |  |  | 10 | Kayongo-Male et al., 1980 [140] |
| Manganese oxide     | 96* | MnSO <sub>4</sub> .H <sub>2</sub> O | Mn Abs |  |  | 10 | Kayongo-Male et al., 1980 [140] |

Abs = absorption

## ZINC

### Individual species tables for relative bioavailability of supplemental zinc sources

**Table S12. Cattle**

| Source                     | RV, %   | Standard                         | Response Criterion       | Method Calculation | Type diet    | Added level, mg/kg             | Reference                   |
|----------------------------|---------|----------------------------------|--------------------------|--------------------|--------------|--------------------------------|-----------------------------|
| Corn forage                | 100     | <sup>65</sup> Zn Cl <sub>2</sub> | Int lab                  | MR                 | N – 3 mg/kg  | Single oral dose – 35 µCi      | Neathery et al., 1972 [141] |
| Corn forage                | 139     | <sup>65</sup> Zn Cl <sub>2</sub> | Int lab                  | MR                 | N – 3 mg/kg  | Single oral dose – 35 µCi      | Neathery et al., 1972 [141] |
| Zinc carbonate             | 58, 58* | Zinc sulfate                     | Pla Zn                   | MR                 | N – 40 mg/kg | Single oral dose – 20 mg/kg BW | Kincaid, 1979 [142]         |
| Zinc chloride              | 42, 42* | Zinc sulfate                     | Pla Zn                   | MR                 | N – 40 mg/kg | Single oral dose – 20 mg/kg BW | Kincaid, 1979 [142]         |
| Zinc lysine                | 100*    | Zinc sulfate RG                  | Liv Zn                   |                    | N – 17 mg/kg | 23 mg/kg                       | Engle et al., 1997 [143]    |
| Zinc lysine + methionine   | 105     | ZnO                              | Liv Zn                   |                    |              | 300                            | Kincaid, 1979 [142]         |
| Zinc methionine            | 98*     | Zinc sulfate RG                  | Liv Zn                   |                    | N – 17 mg/kg | 23                             | Engle et al., 1997 [143]    |
| Zinc – methionine          | 103     | Zinc oxide                       | Milk yield               | MR                 | N – 50 mg/kg | 400 mg/day                     | Kincaid et al., 1984 [144]  |
| Zinc – methionine          | 133     | Zinc oxide                       | Milk somatic cell counts | MR                 | N – 50 mg/kg | 400 mg/day                     | Kincaid et al., 1984 [144]  |
| Zinc – methionine (4 % Zn) | 99      | Zinc oxide                       | Growth                   | MR                 | N – 81 mg/kg | 360 mg/day                     | Greene et al., 1988 [145]   |
| Zinc – methionine          | 106     | ZnO                              | Growth                   | MR                 | N            | 25                             | Spears, 1989 [146]          |

|                               |          |                                     |                     |    |              |                                  |                               |
|-------------------------------|----------|-------------------------------------|---------------------|----|--------------|----------------------------------|-------------------------------|
| Zinc methionine               | 99*      | Zinc sulfate RG                     | App abs             |    | N            | 20                               | Spears, 1989 [146]            |
| Zinc – methionine             | 105      | Zinc oxide                          | Growth              | MR | N            | 2500 mg/kg in mineral supplement | Spears and Kegley, 1991 [147] |
| Zinc methionine               | 105*     | Zinc sulfate RG                     | App abs             |    |              | 30                               | Nockels et al., 1993 [9]      |
| ZnO                           | 100      | ZnSO <sub>4</sub> ·H <sub>2</sub> O | Wound healing       | MR | N – 30 mg/kg | 400                              | Miller et al., 1967 [148]     |
| Zinc oxide                    | 98, 101* | Zinc sulfate                        | Liv Zn              | MR | N – 33 mg/kg | 600                              | Miller et al., 1970 [149]     |
| Zinc oxide                    | 98       | Zinc sulfate                        | App abs             | MR | N – 33 mg/kg | 600                              | Miller et al., 1970 [149]     |
| Zinc oxide                    | 98, 98*  | Zinc sulfate                        | Pla Zn              | MR | N – 40 mg/kg | Single oral dose – 20 mg/kg BW   | Kincaid, 1979 [142]           |
| Zinc oxide                    | 98*      | Zinc sulfate RG                     | App abs             |    |              | 20                               | Spears, 1989 [146]            |
| Zinc – polysaccharide complex | 144      | ZnO                                 | Rum fl microbial Zn | MR | N            | 172                              | Kennedy et al., 1988 [150]    |

Int = intrinsic; Lab = label; MR = mean ratio; N = natural; Pla = plasma; Liv = liver; abs = absorption; Rum = rumen; Fl = fluid; RG = reagent grade

## Poultry

**Table S13. Chickens**

| Source                       | RV, %           | Q <sub>f</sub> | Standard          | Response Criterion | Method Calculation | Type diet | Added level, mg/kg | Reference                 |
|------------------------------|-----------------|----------------|-------------------|--------------------|--------------------|-----------|--------------------|---------------------------|
| Beef                         | 97              |                | ZnCO <sub>3</sub> | Growth             | SR                 | P         | 24                 | Hempe, 1987 [151]         |
| Beef                         | 117             |                | ZnCO <sub>3</sub> | Pla Zn             | SR                 | P         | 24                 | Hempe, 1987 [151]         |
| Beef                         | 102             |                | ZnCO <sub>3</sub> | Tibia Zn           | SR                 | P         | 24                 | Hempe, 1987 [151]         |
| Beef (SPC & Egg white diets) | 100 (111 – 116) |                | ZnCO <sub>3</sub> | Tibia Zn           | SR                 | P         | 8 – 22             | Hortin et al., 1991 [152] |
| Corn                         | 63              |                | ZnCO <sub>3</sub> | Growth             | MR                 | P         | 5 – 10             | O'Dell et al., 1972 [153] |
| Corn, high lysine            | 65              |                | ZnCO <sub>3</sub> | Growth             | MR                 | P         | 5 – 10             | O'Dell et al., 1972 [153] |

|                                                        |                |  |                                                     |              |    |        |                                                    |                               |
|--------------------------------------------------------|----------------|--|-----------------------------------------------------|--------------|----|--------|----------------------------------------------------|-------------------------------|
| Corn germ                                              | 54             |  | ZnCO <sub>3</sub>                                   | Growth       | MR | P      | 5 – 10                                             | O'Dell et al., 1972 [153]     |
| Corn germ, high lysine                                 | 56             |  | ZnCO <sub>3</sub>                                   | Growth       | MR | P      | 5 – 10                                             | O'Dell et al., 1972 [153]     |
| Egg yolk                                               | 79             |  | ZnCO <sub>3</sub>                                   | Growth       | MR | P      | 5 – 10                                             | O'Dell et al., 1972 [153]     |
| Egg white                                              | 40             |  | ZnSO <sub>4</sub> ·7H <sub>2</sub> O                | Growth       | SR | P      | 7 - 10                                             | Edwards and Baker, 2000 [154] |
| Fe-ZnSO <sub>4</sub> ·H <sub>2</sub> O                 | 107*           |  | ZnSO <sub>4</sub> ·H <sub>2</sub> O FG              | Per, Bone Zn |    |        | 4.88 (5.02), 9.75 (10.04) (reference) 5.01 – 10.22 | Edwards et al., 1998 [155]    |
| Fish meal                                              | 75             |  | ZnCO <sub>3</sub>                                   | Growth       | MR | P      | 5 – 10                                             | O'Dell et al., 1972 [153]     |
| Franklinite (Fe, Mn, Zn, FeO) <sub>2</sub> (16.3 % Zn) | 70, 70*        |  | ZnSO <sub>4</sub> ·7H <sub>2</sub> O RG (22.7 % Zn) | Growth       | MR | SP     | 10, 20                                             | Edwards, 1959 [156]           |
| Hemimorphite (2ZnO·SiO <sub>2</sub> ·H <sub>2</sub> O) | 98, 98*        |  | ZnSO <sub>4</sub> ·7H <sub>2</sub> O RG             | Growth       | MR | SP     | 10, 20                                             | Edwards, 1959 [156]           |
| Milk, defatted                                         | 82             |  | ZnCO <sub>3</sub>                                   | Growth       | MR | P      | 5 – 10                                             | O'Dell et al., 1972 [153]     |
| Ore – franklinite + willemite + calcite (16.8 % Zn)    | 95             |  | ZnSO <sub>4</sub> ·7H <sub>2</sub> O RG             | Growth       | MR | SP     | 10, 20                                             | Edwards, 1959 [156]           |
| Oysters                                                | 95             |  | ZnCO <sub>3</sub>                                   | Growth       | MR | P      | 5 – 10                                             | O'Dell et al., 1972 [153]     |
| Pork liver (Barrow, Gilt)                              | 100 (118, 137) |  | ZnSO <sub>4</sub> ·H <sub>2</sub> O                 | Bone         | SR | P - 13 | 4                                                  | Aoyagi et al., 1995 [157]     |
| Rice                                                   | 62             |  | ZnCO <sub>3</sub>                                   | Growth       | MR | P      | 5 – 10                                             | O'Dell et al., 1972 [153]     |
| Sesame meal                                            | 59             |  | ZnCO <sub>3</sub>                                   | Growth       | MR | P      | 5 – 10                                             | O'Dell et al., 1960 [158]     |
| Smithsonite (ZnCO <sub>3</sub> ) (46.8 % Zn)           | 96             |  | ZnSO <sub>4</sub> ·7H <sub>2</sub> O RG             | Growth       | MR | SP     | 10, 20                                             | Edwards, 1959 [156]           |
| Soybean meal                                           | 61, 67         |  | ZnCO <sub>3</sub>                                   | Growth       | MR | P      | 5 – 10                                             | O'Dell et al., 1972 [153]     |
| SBM, SPC, SPI                                          | 78, 65, 74     |  | ZnSO <sub>4</sub> ·7H <sub>2</sub> O                | Growth       | SR | P – 14 | 7 – 10                                             | Edwards and Baker, 2000 [154] |

|                                                     |             |      |                                         |                                               |    |                |                    |                                    |
|-----------------------------------------------------|-------------|------|-----------------------------------------|-----------------------------------------------|----|----------------|--------------------|------------------------------------|
| SBM, SPC, SPI                                       | 41, 34, 39  |      | ZnSO <sub>4</sub> ·7H <sub>2</sub> O    |                                               |    |                |                    | Edwards and Baker, 1999 [159]      |
| Sphalerite (ZnS) (64.2 % Zn)                        | 60, 60*     |      | ZnSO <sub>4</sub> ·7H <sub>2</sub> O RG | Growth                                        | MR | SP             | 10, 20             | Edwards, 1959 [156]                |
| Wheat                                               | 59          |      | ZnCO <sub>3</sub>                       | Growth                                        | MR | P              | 5 – 10             | O'Dell et al., 1972 [153]          |
| Willemite Zn <sub>2</sub> SiO <sub>4</sub> (46.7 %) | 103, 103*   |      | ZnSO <sub>4</sub> ·7H <sub>2</sub> O RG | Growth                                        | MR | SP             | 10, 20             | Edwards, 1959 [156]                |
| Zinc amino acid chelate (9.42 % Zn)                 | 83, 76      |      | ZnSO <sub>4</sub> ·7H <sub>2</sub> O RG | Bone Zn, Mucosa                               | SR | N – 59 mg/kg   | 200, 400           | Cao et al., 2000 [160]             |
| Zinc carbonate                                      | 100         |      | Zinc chloride                           | Growth                                        | MR | P – 6 mg/kg    | 20, 40             | Pensack et al., 1958 [161]         |
| Zinc carbonate                                      | 107, 109*   |      | Zinc sulfate                            | Growth                                        | TP | P – 10 mg/kg   | 10, 20             | Roberson and Schaible, 1960a [162] |
| Zinc carbonate                                      | 123         |      | Zinc sulfate                            | Decreased growth                              | TP | N              | 1000, 2000, 3000   | Roberson and Schaible, 1960b [163] |
| Zinc chloride                                       | 99          |      | Zinc sulfate                            | Growth                                        | TP | P – 10 mg/kg   | 100                | Roberson and Schaible, 1958 [164]  |
| Zinc chloride basic                                 | 107*        |      | ZnSO <sub>4</sub> ·7H <sub>2</sub> O RG | Bone Zn                                       |    |                | (200), 400         | Cao et al., 2000 [160]             |
| Zinc chloride basic                                 | 110, 98-119 |      | ZnSO <sub>4</sub> ·7H <sub>2</sub> O RG | Growth, Bone, Pla ALP, Cu/Zn SOD, Pan MT mRNA |    |                | 20, 40, 80         | Yu et al., 2021 [165]              |
| Zinc – methionine                                   | 79          |      | ZnCl <sub>2</sub>                       | <sup>65</sup> Zn abs by gut sacs              | MR |                | 10 µCi             | Hill et al., 1987 [166]            |
| Zinc – methionine FG                                | 100         |      | Zinc oxide                              | Bone Zn                                       | TP | SP – 8 mg/kg   | 10, 20, 30, 40, 50 | Pimentel et al., 1991 [167]        |
| Zinc proteinate                                     | 105         | 1.98 | ZnSO <sub>4</sub> ·7H <sub>2</sub> O RG | Bone Zn                                       | SR | N -26.45 mg/kg | 10, 20, 40, 80     | Liu et al., 2013 [168]             |
| Zinc proteinate                                     | 104         | 1.98 | ZnSO <sub>4</sub> ·7H <sub>2</sub> O RG | Pan MT mRNA                                   | SR | N -26.45 mg/kg | 10, 20, 40, 80     | Liu et al., 2013 [168]             |
| Zinc sulphate basic                                 | 101*        |      | ZnSO <sub>4</sub> ·7H <sub>2</sub> O RG | Bone Zn                                       |    |                | (200), 400         | Cao et al., 2000 [160]             |

|                                                                                              |                  |  |                                              |                     |    |                   |                     |                                          |
|----------------------------------------------------------------------------------------------|------------------|--|----------------------------------------------|---------------------|----|-------------------|---------------------|------------------------------------------|
| Zinc sulfate tribasic<br>( $\text{Zn}_4(\text{OH})_6\text{SO}_4$ ),<br>(54.8 % Cu) Day 6, 14 | 96,<br>100       |  | $\text{ZnSO}_4 \cdot 7\text{H}_2\text{O}$ RG | Bone Zn             | SR | N – 27<br>mg/kg   | 30, 60, 90          | Li et al., 2015<br>[169]                 |
| Zinc sulfate tribasic<br>( $\text{Zn}_4(\text{OH})_6\text{SO}_4$ ),<br>(54.8 % Cu) Day 6, 14 | 84,<br>116       |  | $\text{ZnSO}_4 \cdot 7\text{H}_2\text{O}$ RG | Pan Zn              | SR | N – 27<br>mg/kg   | 30, 60, 90          | Li et al., 2015<br>[169]                 |
| Zinc sulfate tribasic<br>( $\text{Zn}_4(\text{OH})_6\text{SO}_4$ ),<br>(54.8 % Cu) Day 6, 14 | 88,<br>124       |  | $\text{ZnSO}_4 \cdot 7\text{H}_2\text{O}$ RG | Pla Zn              | SR | N – 27<br>mg/kg   | 30, 60, 90          | Li et al., 2015<br>[169]                 |
| Zinc sulfate tribasic<br>( $\text{Zn}_4(\text{OH})_6\text{SO}_4$ ),<br>(54.8 % Cu) Day 6, 14 | 76,<br>100       |  | $\text{ZnSO}_4 \cdot 7\text{H}_2\text{O}$ RG | Pan MT<br>mRNA      | SR | N – 27<br>mg/kg   | 30, 60, 90          | Li et al., 2015<br>[169]                 |
| Zinc oxide                                                                                   | 49*              |  | $\text{ZnSO}_4 \cdot 7\text{H}_2\text{O}$ RG | Bone Zn             |    |                   | (200), 400          | Cao et al., 2000<br>[160]                |
| Zinc oxide                                                                                   | 100              |  | Zinc chloride                                | Growth              | MR | P – 6<br>mg/kg    | 20, 40              | Pensack et al.,<br>1958 [161]            |
| Zinc oxide                                                                                   | 108,<br>105*     |  | Zinc sulfate                                 | Growth              | TP | P – 10<br>mg/kg   | 10, 20              | Roberson and<br>Schaible, 1960a<br>[162] |
| Zinc oxide                                                                                   | 61               |  | Zinc sulfate                                 | Decreased<br>growth | MR | N                 | 1000, 2000,<br>3000 | Roberson and<br>Schaible, 1960b<br>[163] |
| Zinc oxide                                                                                   | 67*<br>37,       |  | $\text{ZnSO}_4 \cdot 7\text{H}_2\text{O}$ RG | Per, Bone<br>Zn     | SR | P – 13.5<br>mg/kg | 4.73-10.52          | Edwards and<br>Baker, 1999<br>[159]      |
| Zinc oxide FG:<br>(Assay 1)<br>1 (7.13 mg/kg),<br>2 (8.48 mg/kg)<br>3 (8.33 mg/kg)           | 94,<br>32,<br>47 |  | $\text{ZnSO}_4 \cdot 7\text{H}_2\text{O}$ RG | Growth              | SR | P – 13.5<br>mg/kg | 4.76, 9.90          | Edwards and<br>Baker, 1999<br>[159]      |
| Zinc oxide FG:<br>(Assay 1)<br>1 (7.13 mg/kg),<br>2 (8.48 mg/kg)<br>3 (8.33 mg/kg)           | 91,<br>22,<br>44 |  | $\text{ZnSO}_4 \cdot 7\text{H}_2\text{O}$ RG | Bone Zn             | SR | P – 13.5<br>mg/kg | 4.76, 9.90          | Edwards and<br>Baker, 1999<br>[159]      |
| Zinc, elemental<br>powder (100.0 % Zn)                                                       | 102,<br>102*     |  | $\text{ZnSO}_4 \cdot 7\text{H}_2\text{O}$ RG | Growth              | MR | SP                | 10, 20              | Edwards, 1959<br>[156]                   |
| Zincite ZnO (65.3 %<br>Zn)                                                                   | 97               |  | $\text{ZnSO}_4 \cdot 7\text{H}_2\text{O}$ RG | Growth              | MR | SP                | 10, 20              | Edwards, 1959<br>[156]                   |
| Zn amino acid<br>complex (phytase                                                            | 103              |  | $\text{ZnSO}_4 \cdot 7\text{H}_2\text{O}$    | Growth              | SR | SP - 44           | 10, 20, 40          | Swiatkiewicz<br>et al., 2001<br>[170]    |

|                                                          |                    |     |                                         |                                         |    |                                     |                |                                 |
|----------------------------------------------------------|--------------------|-----|-----------------------------------------|-----------------------------------------|----|-------------------------------------|----------------|---------------------------------|
| supplemented, 750 FTU/kg)                                |                    |     |                                         |                                         |    |                                     |                |                                 |
| Zn amino acid complex (phytase supplemented, 750 FTU/kg) | 104                |     | ZnSO <sub>4</sub> ·7H <sub>2</sub> O    | Feed conversion                         | SR | SP - 44                             | 10, 20, 40     | Swiatkiewicz et al., 2001 [170] |
| Zn amino acid complex (phytase supplemented, 750 FTU/kg) | 114, 114, 109      |     | ZnSO <sub>4</sub> ·7H <sub>2</sub> O    | Bone Zn (dried tibia, tibia ash, total) | SR | SP - 44                             | 10, 20, 40     | Swiatkiewicz et al., 2001 [170] |
| Zn amino acid complex (no phytase supplement)            | 121                |     | ZnSO <sub>4</sub> ·7H <sub>2</sub> O    | Growth                                  | SR | SP - 44                             | 10, 20, 40     | Swiatkiewicz et al., 2001 [170] |
| Zn amino acid complex (no phytase supplement)            | 116                |     | ZnSO <sub>4</sub> ·7H <sub>2</sub> O    | Feed conversion                         | SR | SP - 44                             | 10, 20, 40     | Swiatkiewicz et al., 2001 [170] |
| Zn amino acid complex (no phytase supplement)            | 139, 142, 117      |     | ZnSO <sub>4</sub> ·7H <sub>2</sub> O    | Bone Zn (dried tibia, tibia ash, total) | SR | SP - 44                             | 10, 20, 40     | Swiatkiewicz et al., 2001 [170] |
| Zn amino acid complex                                    | 164                |     | ZnSO <sub>4</sub> ·7H <sub>2</sub> O RG | Bone Zn                                 | SR | N - 34                              | 5, 10, 15      | Star et al., 2012 [171]         |
| Zn amino acid complex C (11.93 % Zn)                     | 100, 105, 101, 103 | 6.5 | ZnSO <sub>4</sub> RG                    | Pan MT mRNA, Bone, Pan, Pan MT          | SR | N - 28 mg/kg                        | 30, 60, 90     | Huang et al., 2009 [172]        |
| Zn amino acid L (119 g Zn/kg))                           | 101                | 6.6 | ZnSO <sub>4</sub> ·7H <sub>2</sub> O    | Pan MT mRNA                             | SR | N - 28 mg/kg, low phytate (4.6 g)   | 30, 60         | Huang et al., 2013 [173]        |
| Zn amino acid L (119 g Zn/kg))                           | 105                | 6.6 | ZnSO <sub>4</sub> ·7H <sub>2</sub> O    | Pan MT mRNA                             | SR | N - 28 mg/kg, high phytate (14.2 g) | 30, 60         | Huang et al., 2013 [173]        |
| ZnCO <sub>3</sub> RG (52.1 % Zn)                         | 100, 98*           |     | ZnSO <sub>4</sub> ·7H <sub>2</sub> O RG | Growth                                  | MR | SP                                  | 10, 20         | Edwards, 1959 [156]             |
| ZnCO <sub>3</sub> RG                                     | 78*                |     | ZnSO <sub>4</sub> ·7H <sub>2</sub> O RG | Bone Zn                                 | SR | N - 63 mg/kg                        | 400, 800, 1200 | Sandoval et al., 1997 [174]     |

|                                                                                                          |                      |  |                                         |                                      |    |                     |                                                             |                                      |
|----------------------------------------------------------------------------------------------------------|----------------------|--|-----------------------------------------|--------------------------------------|----|---------------------|-------------------------------------------------------------|--------------------------------------|
| Zn <sub>5</sub> Cl <sub>2</sub> (OH) <sub>8</sub> ,<br>Tetrabasic zinc<br>chloride (TBZC)<br>(60.2 % Zn) | 102,<br>111          |  | ZnSO <sub>4</sub> ·7H <sub>2</sub> O    | Growth                               | SR | P                   | 5.81, 10.81,<br>15.10, 20.25                                | Batal et al.,<br>2001 [175]          |
| Zn-FeSO <sub>4</sub> ·H <sub>2</sub> O                                                                   | 99*                  |  | ZnSO <sub>4</sub> ·H <sub>2</sub> O FG  | Per, Bone<br>Zn                      |    | P – 13.5<br>mg/kg   | 4.88 (5.02),<br>9.75 (10.04)<br>(reference)<br>5.01 – 10.22 | Edwards et al.,<br>1998 [155]        |
| Zn – lysine (7.21 %<br>Zn)                                                                               | 106,<br>111          |  | ZnSO <sub>4</sub> ·H <sub>2</sub> O FG  | Bone Zn                              | SR | N – 13              | 2.9, 5.8                                                    | Aoyagi and<br>Baker, 1993b<br>[23]   |
| Zn metal RG                                                                                              | 46*                  |  | ZnSO <sub>4</sub> ·7H <sub>2</sub> O RG | Bone Zn                              | SR | N – 63<br>mg/kg     | 400, 800,<br>1200                                           | Sandoval et al.,<br>1997 [174]       |
| Zn metal dust (100 %<br>Zn) (7.88 mg/kg)<br>(Assay 2)                                                    | 67*                  |  | ZnSO <sub>4</sub> ·7H <sub>2</sub> O RG | Growth                               | SR | P – 13.5<br>mg/kg   | 5.06, 10.12                                                 | Edwards and<br>Baker, 1999<br>[159]  |
| Zn metal fume<br>(91.5% Zn), (10.52<br>mg/kg) (Assay 3)                                                  | 36*                  |  | ZnSO <sub>4</sub> ·7H <sub>2</sub> O RG | Growth                               | SR | P – 13.5<br>mg/kg   | 4.73, 9.13                                                  | Edwards and<br>Baker, 1999<br>[159]  |
| Zn methionine                                                                                            | 121*                 |  | ZnSO <sub>4</sub> ·H <sub>2</sub> O     | Bone Zn,<br>Per                      |    |                     | 7.5, 15                                                     | Wedekind and<br>Baker, 1990<br>[176] |
| Zn – methionine (+<br>0.6 or 0.74% Ca)                                                                   | 166,<br>292          |  | ZnSO <sub>4</sub> ·H <sub>2</sub> O RG  | Bone Zn                              | SR | P – amino<br>acid   | 5, 10                                                       | Wedekind<br>1994 [177]               |
| Zn methionine (Day<br>3, 6, 9)                                                                           | 91, 94,<br>77        |  | Zn acetate RG                           | Bone Zn                              | SR | N – 24<br>mg/kg     | 30, 60                                                      | Cao et al., 2002<br>[178]            |
| Zn methionine (Day<br>3, 6, 9)                                                                           | 88, 91,<br>78        |  | Zn acetate RG                           | Mucosal<br>MT                        | SR | N – 24<br>mg/kg     | 30, 60                                                      | Cao et al., 2002<br>[178]            |
| Zn methionine<br>chelate (17.6 % Zn)<br>(Day 7)                                                          | 99.4,<br>103,<br>120 |  | ZnSO <sub>4</sub> ·7H <sub>2</sub> O    | Bone,<br>Pancreas,<br>Pan MT<br>mRNA | SR | N – 29<br>mg/kg     | 30, 60, 90                                                  | Suo et al., 2015<br>[179]            |
| Zn methionine<br>chelate (17.6 % Zn)<br>(Day 21)                                                         | 107,<br>115,<br>106  |  | ZnSO <sub>4</sub> ·7H <sub>2</sub> O    | Bone,<br>Pancreas,<br>Pan MT<br>mRNA | SR | N – 29<br>mg/kg     | 30, 60, 90                                                  | Suo et al., 2015<br>[179]            |
| Zn – methionine FG                                                                                       | 124,<br>136*         |  | ZnSO <sub>4</sub> ·H <sub>2</sub> O RG  | Growth                               | SR | P                   | 7.5, 15                                                     | Wedekind et<br>al., 1992 [180]       |
| Zn – methionine FG                                                                                       | 176 <sup>l</sup>     |  | ZnSO <sub>4</sub> ·H <sub>2</sub> O RG  | Bone Zn                              | SR | SP – soy<br>isolate | 7.5, 15                                                     | Wedekind et<br>al., 1992 [180]       |



|                                                                                              |                    |  |                                         |                                  |    |                                           |                   |                                |
|----------------------------------------------------------------------------------------------|--------------------|--|-----------------------------------------|----------------------------------|----|-------------------------------------------|-------------------|--------------------------------|
| Zn – methionine FG                                                                           | 206 <sup>1,2</sup> |  | ZnSO <sub>4</sub> .H <sub>2</sub> O RG  | Bone Zn                          | SR | C – SBM                                   | 7.5, 15           | Wedekind et al., 1992 [180]    |
| Zn – methionine FG                                                                           | 117 <sup>1</sup>   |  | ZnSO <sub>4</sub> .H <sub>2</sub> O RG  | Bone Zn                          | SR | P – crystalline amino acid                | 7.5, 15           | Wedekind et al., 1992 [180]    |
| Zn methionine hydroxy analog chelate (Zn bis(-2-hydroxy-4-(methylthio)butanoic acid) ZnHMTBa | 161, 165, 248      |  | ZnSO <sub>4</sub> .H <sub>2</sub> O RG  | Bone (total), Bone conc. MT mRNA | SR | C-SBM – 21 mg/kg                          | 5, 10, 15, 20, 30 | Richards et al., 2015 [181]    |
| Zn methionine hydroxy analog chelate (Zn bis(-2-hydroxy-4-(methylthio)butanoic acid) ZnHMTBa | 441, 307, 426      |  | ZnSO <sub>4</sub> .H <sub>2</sub> O RG  | Bone (total), Bone conc. MT mRNA | SR | C-SBM – 27 mg/kg + Ca (1.2 %) + P (1.3 %) | 7.5, 15, 30       | Richards et al., 2015 [181]    |
| ZnO RG                                                                                       | 97, 99*            |  | ZnSO <sub>4</sub> .7H <sub>2</sub> O RG | Growth                           | MR | SP                                        | 10, 20            | Edwards, 1959 [156]            |
| ZnO (79.6 % Zn)                                                                              | 104                |  | ZnSO <sub>4</sub> .7H <sub>2</sub> O RG | Growth                           | MR | SP                                        | 10, 20            | Edwards, 1959 [156]            |
| ZnO FG (72 % Zn)                                                                             | 61                 |  | ZnSO <sub>4</sub> .H <sub>2</sub> O RG  | Growth                           | SR | P – 13 mg/kg                              | 7.5, 15           | Wedekind and Baker, 1990 [176] |
| ZnO FG (72 % Zn)                                                                             | 44, 44*            |  | ZnSO <sub>4</sub> .H <sub>2</sub> O RG  | Bone Zn                          | SR | P – 13 mg/kg                              | 7.5, 15           | Wedekind and Baker, 1990 [176] |
| ZnO                                                                                          | 53                 |  | ZnSO <sub>4</sub> .H <sub>2</sub> O RG  | Growth, Bone Zn                  | SR | P                                         | 7.5, 15           | Wedekind et al., 1992 [180]    |
| ZnO                                                                                          | 36*                |  | ZnSO <sub>4</sub> .H <sub>2</sub> O RG  | Bone Zn, Per                     |    |                                           | 7.5, 15           | Wedekind and Baker, 1990 [176] |
| ZnO RG                                                                                       | 72*, 77            |  | ZnSO <sub>4</sub> .7H <sub>2</sub> O RG | Bone Zn                          | SR | N – 63 mg/kg                              | 400, 800, 1200    | Sandoval et al., 1997 [174]    |
| ZnO FG – A                                                                                   | 78                 |  | ZnSO <sub>4</sub> .7H <sub>2</sub> O RG | Bone Zn                          | SR | N – 75 mg/kg                              | 300, 600, 900     | Sandoval et al., 1997 [174]    |
| ZnO FG – B                                                                                   | 54                 |  | ZnSO <sub>4</sub> .7H <sub>2</sub> O RG | Bone Zn                          | SR | N – 75 mg/kg                              | 300, 600, 900     | Sandoval et al., 1997 [174]    |
| ZnO FG                                                                                       | 74                 |  | ZnSO <sub>4</sub> .7H <sub>2</sub> O RG | Bone Zn                          | SR | N – 35 mg/kg                              | 40, 80, 120       | Sandoval et al., 1997 [174]    |

|                                                                                |                     |     |                                         |                         |    |                |                  |                               |
|--------------------------------------------------------------------------------|---------------------|-----|-----------------------------------------|-------------------------|----|----------------|------------------|-------------------------------|
| ZnO AG (7.46 mg/kg),<br>FG-1 (7.75 mg/kg),<br>FG-2 (8.23 mg.kg)<br>(Assay 2)   | 89,<br>97,<br>41    |     | ZnSO <sub>4</sub> ·7H <sub>2</sub> O RG | Growth                  | SR | P – 13.5 mg/kg | 5.06, 10.12      | Edwards and Baker, 1999 [159] |
| ZnO FG 1 (6.71 mg/kg),<br>FG-2 (8.98 mg/kg),<br>FG-4 (6.69 mg.kg)<br>(Assay 3) | 93,<br>39,<br>84    |     | ZnSO <sub>4</sub> ·7H <sub>2</sub> O RG | Growth                  | SR | P – 13.5 mg/kg | 4.73, 9.13       | Edwards and Baker, 1999 [159] |
| Zn oxide FG 1 (72 % Zn)                                                        | 59, 99,<br>45       |     | ZnSO <sub>4</sub> ·H <sub>2</sub> O     | Growth                  | SR | N – 26 mg/kg   | 100, 150,<br>200 | Sahraei et al., 2013 [182]    |
| Zn oxide FG 2 (75 % Zn)                                                        | 64, 78,<br>31       |     | ZnSO <sub>4</sub> ·H <sub>2</sub> O     | Growth                  | SR | N – 26 mg/kg   | 100, 150,<br>200 | Sahraei et al., 2013 [182]    |
| Zn polysaccharide complex (19.02 % Zn)                                         | 94                  | 3.8 | ZnSO <sub>4</sub> ·7H <sub>2</sub> O RG | Bone Zn                 | SR | N – 100 mg/kg  | 200              | Cao et al., 2000 [160]        |
| Zn propionate                                                                  | 119                 |     | Zinc sulfate FG                         | Growth                  | SR | N – 21 mg/kg   | 6, 12            | Brooks et al., 2013 [183]     |
| Zn propionate                                                                  | 116,<br>116         |     | Zinc sulfate FG                         | Bone Zn, total tibia Zn | SR | N – 21 mg/kg   | 6, 12            | Brooks et al., 2013 [183]     |
| Zn proteinate A (13.63 % Zn)                                                   | 139,<br>133         | 13  | ZnSO <sub>4</sub> ·7H <sub>2</sub> O RG | Bone Zn, Mucosa         | SR | N – 59 mg/kg   | 200, 400         | Cao et al., 2000 [160]        |
| Zn proteinate B (13.65 % Zn)                                                   | 99                  | 91  | ZnSO <sub>4</sub> ·7H <sub>2</sub> O RG | Bone Zn                 | SR | N – 100 mg/kg  | 200              | Cao et al., 2000 [160]        |
| Zn proteinate C (13.01 % Zn)                                                   | 108                 | 120 | ZnSO <sub>4</sub> ·7H <sub>2</sub> O RG | Bone Zn                 | SR | N – 100 mg/kg  | 200              | Cao et al., 2000 [160]        |
| Zn proteinate (Day 3, 6, 9)                                                    | 110,<br>124,<br>116 |     | Zn acetate RG                           | Bone Zn                 | SR | N – 24 mg/kg   | 30, 60           | Cao et al., 2002 [178]        |
| Zn proteinate (Day 3, 6, 9)                                                    | 128,<br>99,<br>130  |     | Zn acetate RG                           | Mucosal MT              | SR | N – 24 mg/kg   | 30, 60           | Cao et al., 2002 [178]        |
| Zn proteinate                                                                  | 183                 |     | ZnSO <sub>4</sub> ·7H <sub>2</sub> O RG | Growth                  | SR | N – 23 mg/kg   | 5, 10, 20, 40    | Ao et al., 2006 [184]         |
| Zn proteinate                                                                  | 157                 |     | ZnSO <sub>4</sub> ·7H <sub>2</sub> O RG | Bone Zn                 | SR | N – 23 mg/kg   | 5, 10, 20, 40    | Ao et al., 2006 [184]         |
| Zinc proteinate                                                                | 100                 |     | Zinc chloride                           | Growth                  | MR | P – 6 mg/kg    | 20, 40           | Pensack et al., 1958 [161]    |
| Zn proteinate A (18.61 % Zn)                                                   | 72,<br>97,<br>101,  | 944 | ZnSO <sub>4</sub> RG                    | Pan MT mRNA, Bone,      | SR | N – 28 mg/kg   | 30, 60, 90       | Huang et al., 2009 [172]      |

|                                                                                                                   |                             |      |                                         |                                            |    |                                                 |                  |                                     |
|-------------------------------------------------------------------------------------------------------------------|-----------------------------|------|-----------------------------------------|--------------------------------------------|----|-------------------------------------------------|------------------|-------------------------------------|
|                                                                                                                   | 92                          |      |                                         | Pan,<br>Pan MT                             |    |                                                 |                  |                                     |
| Zn proteinate B<br>(13.27 % Zn)                                                                                   | 121,<br>106,<br>104,<br>111 | 30.7 | ZnSO <sub>4</sub> RG                    | Pan MT<br>mRNA,<br>Bone,<br>Pan,<br>Pan MT | SR | N – 28<br>mg/kg                                 | 30, 60, 90       | Huang et al.,<br>2009 [172]         |
| Zn proteinate M (133<br>g Zn/kg)                                                                                  | 128                         | 30.7 |                                         | Pan MT<br>mRNA                             | SR | N – 28<br>mg/kg,<br>low<br>phytate<br>(4.6 g)   | 30, 60           | Huang et al.,<br>2013 [173]         |
| Zn proteinate H (186<br>g Zn/kg)                                                                                  | 70                          | 944  |                                         | Pan MT<br>mRNA                             | SR | N – 28<br>mg/kg,<br>low<br>phytate<br>(4.6 g)   | 30, 60           | Huang et al.,<br>2013 [173]         |
| Zn proteinate M (133<br>g Zn/kg)                                                                                  | 139                         | 30.7 |                                         | Pan MT<br>mRNA                             | SR | N – 28<br>mg/kg,<br>high<br>phytate<br>(14.2 g) | 30, 60           | Huang et al.,<br>2013 [173]         |
| Zn proteinate H (186<br>g Zn/kg)                                                                                  | 92                          | 944  |                                         | Pan MT<br>mRNA                             | SR | N – 28<br>mg/kg,<br>high<br>phytate<br>(14.2 g) | 30, 60           | Huang et al.,<br>2013 [173]         |
| Zn proteinate (15 %<br>Zn)                                                                                        | 151,<br>200,<br>147         |      | ZnSO <sub>4</sub> .H <sub>2</sub> O     | Growth                                     | SR | N – 26<br>mg/kg                                 | 100, 150,<br>200 | Sahraei et al.,<br>2013 [182]       |
| ZnSO <sub>4</sub> .H <sub>2</sub> O FG (7.29<br>mg/kg)<br>FG – 1 (7.25 mg/kg)<br>FG – 2 (7.04 mg/kg)<br>(Assay 2) | 87*,<br>89,<br>86,<br>87    |      | ZnSO <sub>4</sub> .7H <sub>2</sub> O RG | Growth                                     |    | P – 13.5<br>mg/kg                               | 5.06, 10.12      | Edwards and<br>Baker, 1999<br>[159] |
| ZnSO <sub>4</sub> FG                                                                                              | 89*                         |      | ZnSO <sub>4</sub> .7H <sub>2</sub> O RG | Bone Zn                                    | SR | N – 63<br>mg/kg                                 | 300, 600,<br>900 | Sandoval et al.,<br>1997 [174]      |
| ZnSO <sub>4</sub> FG – A<br>(granular)                                                                            | 99                          |      | ZnSO <sub>4</sub> .7H <sub>2</sub> O RG | Bone Zn                                    | SR | N – 75<br>mg/kg                                 | 300, 600,<br>900 | Sandoval et al.,<br>1997 [174]      |
| ZnSO <sub>4</sub> FG – B (spray<br>dried)                                                                         | 81                          |      | ZnSO <sub>4</sub> .7H <sub>2</sub> O RG | Bone Zn                                    | SR | N – 75<br>mg/kg                                 | 300, 600,<br>900 | Sandoval et al.,<br>1997 [174]      |

|                      |    |  |                                         |         |    |                 |             |                                |
|----------------------|----|--|-----------------------------------------|---------|----|-----------------|-------------|--------------------------------|
| ZnSO <sub>4</sub> FG | 94 |  | ZnSO <sub>4</sub> ·7H <sub>2</sub> O RG | Bone Zn | SR | N – 35<br>mg/kg | 40, 80, 120 | Sandoval et al.,<br>1997 [174] |
|----------------------|----|--|-----------------------------------------|---------|----|-----------------|-------------|--------------------------------|

MR = mean ratio; SR = slope ratio; TP = three-point; P = purified; SP = semi-purified; N = natural; C-SBM = corn-soybean meal; Pla = plasma; RG = reagent grade; FG = feed grade; Per = performance; SBM = soybean meal; SPC = soy protein concentrate; SPI = soy protein isolate; ALP = alkaline phosphatase; Cu/Zn SOD = Cu, Zn – superoxide dismutase; Pan = pancreatic; MT = metallothionein; mRNA = messenger ribonucleic acid; abs = absorption;

<sup>1</sup> An important consideration concerning the mean RBV of 131 % ± 10.9 for Zn methionine is that among other factors, the type of diet has a considerable effect on the relative bioavailability estimate (Wedekind et al., 1992). Relative to ZnSO<sub>4</sub>·H<sub>2</sub>O FG, the RBV for Zn methionine assayed on an amino acid diet, a soy-isolate diet and a practical corn-soybean diet was found to be 117 % over 177 % to 206 % respectively. It is assumed that this is due to the amount of phytate and soluble fibre, which forms complexes with the Zn of inorganic origin.

<sup>2</sup> Later studies (94) by same author in swine did not show similar results for Zn met and in fact RBV was below that of the sulfate.

**Table S14. Turkeys**

| Source                                                                                                            | RV, % | Standard                                | Response Criterion | Method Calculation | Type diet    | Added level, mg/kg | Reference                     |
|-------------------------------------------------------------------------------------------------------------------|-------|-----------------------------------------|--------------------|--------------------|--------------|--------------------|-------------------------------|
| 1,2 – Diaminocyclohexane-tetraacetic acid – Zn (ZnC <sub>14</sub> H <sub>20</sub> O <sub>8</sub> N <sub>2</sub> ) | 108   | ZnO                                     | Growth             | TP                 | P – 17 mg/kg | 15                 | Vohra and Kratzer, 1966 [185] |
| Diethylenetriamine-pentaacetic acid – Zn (ZnC <sub>14</sub> O <sub>10</sub> H <sub>23</sub> N <sub>3</sub> )      | 118   | ZnO                                     | Growth             | TP                 | P – 17 mg/kg | 15                 | Vohra and Kratzer, 1966 [185] |
| Zinc carbonate (54.0 % Zn)                                                                                        | 100   | ZnSO <sub>4</sub> ·7H <sub>2</sub> O RG | Growth             | TP                 | P – 14 mg/kg | 20, 30, 40         | Sullivan, 1961 [186]          |
| Zinc citrate [Zn <sub>3</sub> (C <sub>6</sub> H <sub>5</sub> O <sub>7</sub> ) <sub>2</sub> ·2H <sub>2</sub> O]    | 128   | ZnO                                     | Growth             | TP                 | P – 17 mg/kg | 15                 | Vohra and Kratzer, 1966 [185] |
| Zinc – EDTA (ZnC <sub>10</sub> H <sub>14</sub> O <sub>8</sub> N <sub>2</sub> ) (19.1 % Zn)                        | 118   | ZnO                                     | Growth             | TP                 | P – 17 mg/kg | 15                 | Vohra and Kratzer, 1966 [185] |
| Zinc – EDTA                                                                                                       | 110   | Zn                                      | Growth             | TP                 | P – 25 mg/kg | 30                 | Kratzer et al., 1959 [187]    |
| ZnCl <sub>2</sub> RG (45.6 % Zn)                                                                                  | 88    | ZnSO <sub>4</sub> ·7H <sub>2</sub> O RG | Growth             | TP                 | P – 14 mg/kg | 20, 30, 40         | Sullivan, 1961 [186]          |
| Zn <sub>2</sub> HP <sub>3</sub> O <sub>10</sub> (29.7 % Zn)                                                       | 69    | ZnO                                     | Growth             | TP                 | P – 17 mg/kg | 15                 | Vohra and Kratzer, 1966 [185] |
| ZnO (71.6 % Zn)                                                                                                   | 78    | ZnSO <sub>4</sub> ·7H <sub>2</sub> O RG | Growth             | TP                 | P – 14 mg/kg | 20, 30, 40         | Sullivan, 1961 [186]          |

|                                                                                                                                  |    |                                         |        |    |                 |            |                                     |
|----------------------------------------------------------------------------------------------------------------------------------|----|-----------------------------------------|--------|----|-----------------|------------|-------------------------------------|
| Zn <sub>3</sub> (PO <sub>4</sub> ) <sub>2</sub> ·4H <sub>2</sub> O<br>(43.4 % Zn)                                                | 48 | ZnO                                     | Growth | TP | P – 17<br>mg/kg | 15         | Vohra and<br>Kratzer, 1966<br>[185] |
| Zn <sub>2</sub> P <sub>2</sub> O <sub>7</sub> ·4H <sub>2</sub> O<br>(34.9 % Zn)                                                  | 61 | ZnO                                     | Growth | TP | P – 17<br>mg/kg | 15         | Vohra and<br>Kratzer, 1966<br>[185] |
| Zn <sub>3</sub> P <sub>6</sub> O <sub>18</sub> (29.8 % Zn)                                                                       | 70 | ZnO                                     | Growth | TP | P – 17<br>mg/kg | 15         | Vohra and<br>Kratzer, 1966<br>[185] |
| Zn – phytate<br>[Zn <sub>6</sub> C <sub>6</sub> H <sub>6</sub> P <sub>6</sub> O <sub>24</sub> ·3H <sub>2</sub> O]<br>(19.1 % Zn) | 76 | ZnO                                     | Growth | TP | P – 17<br>mg/kg | 15         | Vohra and<br>Kratzer, 1966<br>[185] |
| ZnSO <sub>4</sub> ·H <sub>2</sub> O (36.4 %<br>Zn)                                                                               | 75 | ZnSO <sub>4</sub> ·7H <sub>2</sub> O RG | Growth | TP | P – 14<br>mg/kg | 20, 30, 40 | Sullivan, 1961<br>[186]             |

TP = three-point; P = purified; RG = reagent grade; EDTA = ethylenediaminetetraacetate

**Table S15. Japanese Quail**

| Source                           | RV, %           | Standard | Response<br>Criterion       | Method<br>Calculation | Type<br>diet    | Added<br>level,<br>mg/kg | Reference                   |
|----------------------------------|-----------------|----------|-----------------------------|-----------------------|-----------------|--------------------------|-----------------------------|
| Casein (42 mg/kg<br>Zn)          | 47 <sup>1</sup> | -        | <sup>65</sup> Zn ext<br>lab |                       | P – 60<br>mg/kg | Single oral<br>dose      | Jones et al., 1985<br>[188] |
| Egg white (0.8<br>mg/kg Zn)      | 38 <sup>1</sup> | -        | <sup>65</sup> Zn ext<br>lab |                       | P – 60<br>mg/kg | Single oral<br>dose      | Jones et al., 1985<br>[188] |
| Soy concentrate (37<br>mg/kg Zn) | 25 <sup>1</sup> | -        | <sup>65</sup> Zn ext<br>lab |                       | P – 60<br>mg/kg | Single oral<br>dose      | Jones et al., 1985<br>[188] |
| Soy flour (48 mg/kg<br>Zn)       | 24 <sup>1</sup> | -        | <sup>65</sup> Zn ext<br>lab |                       | P – 60<br>mg/kg | Single oral<br>dose      | Jones et al., 1985<br>[188] |

Ext = extrinsic; Lab = label; P = purified

<sup>1</sup> Percentage absorption, not relative bioavailability value

**Table S16. Sheep**

| Source                                 | RV, %        | Q <sub>t</sub> | Standard                                | Response<br>Criterion       | Method<br>Calculation | Type<br>diet    | Added<br>level,<br>mg/kg | Reference                      |
|----------------------------------------|--------------|----------------|-----------------------------------------|-----------------------------|-----------------------|-----------------|--------------------------|--------------------------------|
| Zinc amino acid<br>complex             | 102*         |                | Zinc sulfate RG                         | Liv Zn                      |                       |                 | 90                       | Hatfield et al.,<br>2001 [45]  |
| Zinc amino acid<br>chelate (9.42 % Zn) | 110          | 180            | ZnSO <sub>4</sub> ·7H <sub>2</sub> O RG | Liv, Kid,<br>Pan, Liv<br>MT | SR                    | N – 58<br>mg/kg | 1400                     | Cao et al., 2000<br>[160]      |
| Zinc carbonate RG                      | 105*,<br>106 |                | Zinc sulfate RG                         | Liv, Kid<br>Zn              | SR                    | N – 44<br>mg/kg | 1400                     | Sandoval et al.,<br>1997 [189] |

|                            |                  |     |                                         |                              |    |              |              |                               |
|----------------------------|------------------|-----|-----------------------------------------|------------------------------|----|--------------|--------------|-------------------------------|
| Zinc, chelated             | 91, 96*          |     | ZnSO <sub>4</sub> .H <sub>2</sub> O RG  | Pla Zn                       | MR | P            | 25           | Ho and Hidioglou, 1977 [190]  |
| Zinc, chelated             | 125              |     | ZnSO <sub>4</sub> .H <sub>2</sub> O RG  | Growth                       | MR | P            | 25           | Ho and Hidioglou, 1977 [190]  |
| Zinc chelate               | 98*              |     | Zinc sulfate RG                         | Liv, Kid Zn                  | SR |              | 1400         | Cao et al., 2000 [160]        |
| Zinc EDTA                  | 17               |     | Zinc sulfate                            | Liv Zn                       | TP | N            | 240 mg/kg BW | Smith and Embling, 1984 [191] |
| Zinc glycine               | 335, 82, 86, 179 |     | ZnSO <sub>4</sub> .H <sub>2</sub> O RG  | Pla, Liv, Kid, Liv Cu/Zn SOD | SR | N – 30 mg/kg | 50           | Gresakova et al., 2021 [192]  |
| Zinc lysine                | 114*             |     | Zinc sulfate RG                         | Liv, Kid Zn                  |    |              | 360 mg/kg    | Rojas et al., 1995 [193]      |
| Zinc metal RG              | 95*, 76, 68      |     | Zinc sulfate RG                         | Liv, Kid Zn                  | SR | N – 44 mg/kg | 1400         | Sandoval et al., 1997 [189]   |
| Zinc methionine            | 100*             |     | Zinc sulfate RG                         | Liv, Kid Zn                  |    | N – 20 mg/kg | 360 mg/kg    | Rojas et al., 1995 [193]      |
| Zinc – methionine          | 95               |     | ZnO                                     | Pla Zn                       | MR | SP – 3 mg/kg | 5            | Spears, 1989 [146]            |
| Zinc – methionine          | 103              |     | ZnO                                     | App abs                      | MR | SP – 3 mg/kg | 5            | Spears, 1989 [146]            |
| Zinc – methionine          | 99*              |     | Zinc sulfate RG                         | App abs                      |    |              | 20           | Spears, 1989 [146]            |
| Zinc methionine A          | 98*              | 1.9 | Zinc sulfate RG                         | Liv, Kid Zn                  | SR |              | 1400         | Cao et al., 2000 [160]        |
| Zinc methionine B (9.29 %) | 113              | 1.5 | ZnSO <sub>4</sub> .7H <sub>2</sub> O RG | Liv, Kid, Pan, Liv MT        | SR |              | 1400         | Cao et al., 2000 [160]        |
| Zinc methionine FG         | 133              |     | Zn sulfate FG                           | Liv Cu                       | SR | N – 76 mg/kg | 94           | Pal et al., 2010 [49]         |
| Zinc methionine FG         | 132              |     | Zn sulfate FG                           | Pla Cu                       | SR | N – 76 mg/kg | 94           | Pal et al., 2010 [49]         |
| Zinc methionine FG         | 134              |     | Zn sulfate FG                           | Gut abs                      | SR | N – 76 mg/kg | 94           | Pal et al., 2010 [49]         |
| Zinc oxide                 | 93*              |     | Zinc sulfate RG                         | Liv, Kid Zn                  |    | N – 20 mg/kg | 360 mg/kg    | Rojas et al., 1995 [193]      |
| Zinc oxide                 | 100*, 106        |     | Zinc sulfate RG                         | Liv, Kid Zn                  | SR | N – 44 mg/kg | 1400         | Sandoval et al., 1997 [189]   |

|                                 |                           |    |                                         |                                        |    |                 |      |                                     |
|---------------------------------|---------------------------|----|-----------------------------------------|----------------------------------------|----|-----------------|------|-------------------------------------|
| Zinc oxide A, B                 | 87, 79,<br>80, 74         |    | Zinc sulfate RG                         | Liv, Kid<br>Zn                         | SR | N – 64<br>mg/kg | 1400 | Sandoval et al.,<br>1997 [189]      |
| Zinc proteinate                 | 102*                      | 13 | Zinc sulfate RG                         | Liv, Kid<br>Zn                         | SR |                 | 1400 | Cao et al., 2000<br>[160]           |
| Zn proteinate A<br>(13.63 % Zn) | 130                       | 13 | ZnSO <sub>4</sub> ·7H <sub>2</sub> O RG | Liv, Kid,<br>Pan, Liv<br>MT            | SR |                 | 1400 | Cao et al., 2000<br>[160]           |
| Zn proteinate                   | 254,<br>56,<br>126,<br>58 |    | ZnSO <sub>4</sub> ·H <sub>2</sub> O RG  | Plas, Liv,<br>Kid, Liv<br>Cu/Zn<br>SOD | SR | N – 30<br>mg/kg | 80   | Gresakova et<br>al., 2021 [192]     |
| Zinc sulfate FG – B             | 99*,<br>86, 83            |    | Zinc sulfate RG                         | Liv, Kid<br>Zn                         | SR | N – 64<br>mg/kg | 1400 | Sandoval et al.,<br>1997 [189]      |
| Zinc, sequestered               | 108,<br>97*               |    | ZnSO <sub>4</sub> ·H <sub>2</sub> O RG  | Plas Zn                                | MR | P               | 25   | Ho and<br>Hidiroglou,<br>1977 [190] |
| Zinc, sequestered               | 103                       |    | ZnSO <sub>4</sub> ·H <sub>2</sub> O RG  | Growth                                 | MR | P               | 25   | Ho and<br>Hidiroglou,<br>1977 [190] |

RG = reagent grade; Liv = liver; Kid = kidney; Pan = pancreatic; Pla = plasma; MT = metallothionein; SR = slope ratio, MR = mean ratio; TP = three-point; N = natural; P = purified; SP = semi-purified; Cu/Zn SOD = Cu, Zn-superoxide dismutase; App = apparent; Abs = absorption

**Table S17. Swine**

| Source                                                                                                                             | RV, %                       | Standard                             | Response<br>Criterion  | Method<br>Calculation | Type<br>diet | Added<br>level,<br>mg/kg | Reference                       |
|------------------------------------------------------------------------------------------------------------------------------------|-----------------------------|--------------------------------------|------------------------|-----------------------|--------------|--------------------------|---------------------------------|
| Zinc amino acid<br>chelate                                                                                                         | 102*                        | ZnSO <sub>4</sub> ·xH <sub>2</sub> O | Pan Zn                 |                       |              | 45                       | Swinkels et al.,<br>1996 [194]  |
| Zinc carbonate                                                                                                                     | 98*                         | ZnSO <sub>4</sub> ·7H <sub>2</sub> O | Abs                    |                       |              | 127                      | Hap and<br>Zeman, 1994<br>[195] |
| Zinc chloride,<br>tetrabasic (TBZC)<br>(Zn <sub>5</sub> (OH) <sub>8</sub> Cl <sub>2</sub> ·H <sub>2</sub> O)<br>(58 % Zn) – week 2 | 159                         | ZnO                                  | Pla Zn                 | SR                    | N - 208      | 1500, 2250,<br>3000      | Zhang and<br>Guo, 2007<br>[196] |
| Zinc chloride,<br>tetrabasic (TBZC) –<br>week 4                                                                                    | 125,<br>128,<br>123,<br>122 | ZnO                                  | Pla, Liv,<br>Kid, Bone | SR                    | N - 208      | 1500, 2250,<br>3000      | Zhang and<br>Guo, 2007<br>[196] |

|                                  |           |                                      |                                  |    |              |                   |                                 |
|----------------------------------|-----------|--------------------------------------|----------------------------------|----|--------------|-------------------|---------------------------------|
| Zinc – lysine                    | 100, 110  | ZnSO <sub>4</sub>                    | Pla Zn                           | SR | N            | 3000, 5000        | Hahn and Baker, 1993 [197]      |
| Zinc lysine                      | 98*       | ZnSO <sub>4</sub> .H <sub>2</sub> O  | Abs, Ser, Bone                   |    |              | 100               | Cheng et al., 1998 [198]        |
| Zinc lysine                      | 92*       | ZnSO <sub>4</sub> .xH <sub>2</sub> O | Ser, Bone                        |    |              | 1000, 2000, 3000  | Schell and Kornegay, 1996 [199] |
| Zinc lysine                      | 64*       | ZnSO <sub>4</sub> .H <sub>2</sub> O  | Per, Bone, Pla                   | SR | N – 32p pm   | 5, 10, 20, 40, 80 | Wedekind et al., 1994 [200]     |
| Zinc lysine                      | 38        | ZnSO <sub>4</sub> .H <sub>2</sub> O  | Metacarpal                       | SR | N – 32p pm   | 5, 10, 20, 40, 80 | Wedekind et al., 1994 [200]     |
| Zin lysine                       | 24        | ZnSO <sub>4</sub> .H <sub>2</sub> O  | Coccygeal vertebrae              | SR | N – 32p pm   | 5, 10, 20, 40, 80 | Wedekind et al., 1994 [200]     |
| Zinc lysine                      | 79        | ZnSO <sub>4</sub> .H <sub>2</sub> O  | Pla Zn                           | SR | N – 32p pm   | 5, 10, 20, 40, 80 | Wedekind et al., 1994 [200]     |
| Zinc metal dust (99.3 % Zn)      | 133, 105* | Zinc oxide                           | Ser Zn                           | SR | N – 20 mg/kg | 25, 50            | Miller et al., 1981 [201]       |
| Zinc methionine                  | 101*      | ZnSO <sub>4</sub> .H <sub>2</sub> O  | Per, Bone, Ser                   |    |              | 9, 12, 15         | Hill et al., 1986 [202]         |
| Zinc – methionine                | 100       | ZnCl <sub>2</sub>                    | <sup>65</sup> Zn abs by gut sacs | MR | -            | 10 µCi            | Hill et al., 1987 [166]         |
| Zinc – methionine                | >100, 116 | ZnSO <sub>4</sub>                    | Pla Zn                           | SR | N            | 3000, 5000        | Hahn and Baker, 1993 [197]      |
| Zinc methionine                  | 95*       | ZnSO <sub>4</sub> .xH <sub>2</sub> O | Ser, Bone                        |    |              | 1000, 2000, 3000  | Schell and Kornegay, 1996 [199] |
| Zinc methionine                  | 86*       | ZnSO <sub>4</sub> .H <sub>2</sub> O  | Per, Bone, Pla                   | SR | N – 32mg/kg  | 5, 10, 20, 40, 80 | Wedekind et al., 1994 [200]     |
| Zinc methionine                  | 60        | ZnSO <sub>4</sub> .H <sub>2</sub> O  | Metacarpal                       | SR | N – 32mg/kg  | 5, 10, 20, 40, 80 | Wedekind et al., 1994 [200]     |
| Zinc methionine                  | 84        | ZnSO <sub>4</sub> .H <sub>2</sub> O  | Coccygeal vertebrae              | SR | N – 32mg/kg  | 5, 10, 20, 40, 80 | Wedekind et al., 1994 [200]     |
| Zinc methionine                  | 95        | ZnSO <sub>4</sub> .H <sub>2</sub> O  | Pla Zn                           | SR | N – 32mg/kg  | 5, 10, 20, 40, 80 | Wedekind et al., 1994 [200]     |
| Zinc methionine complex (Zn Org) | 100       | ZnSO <sub>4</sub> .7H <sub>2</sub> O | Growth                           | SR | N - 28       | 10, 20, 30        | Dourmad et al., 2002 [203]      |
| Zinc oxide                       | 50, 56    | ZnSO <sub>4</sub>                    | Pla Zn                           | SR | N            | 3000, 5000        | Hahn and Baker, 1993 [197]      |



|            |      |                                      |                     |    |             |                   |                                 |
|------------|------|--------------------------------------|---------------------|----|-------------|-------------------|---------------------------------|
| Zinc oxide | 110* | ZnSO <sub>4</sub> ·7H <sub>2</sub> O | Abs                 |    |             | 127               | Hap and Zeman, 1994 [195]       |
| Zinc oxide | 87*  | ZnSO <sub>4</sub> ·xH <sub>2</sub> O | Ser, Bone           |    |             | 1000, 2000, 3000  | Schell and Kornegay, 1996 [199] |
| Zinc oxide | 82*  | ZnSO <sub>4</sub> ·H <sub>2</sub> O  | Per, Bone, Pla      | SR | N – 32mg/kg | 5, 10, 20, 40, 80 | Wedekind et al., 1994 [200]     |
| Zinc oxide | 67   | ZnSO <sub>4</sub> ·H <sub>2</sub> O  | Metacarpal          | SR | N – 32mg/kg | 5, 10, 20, 40, 80 | Wedekind et al., 1994 [200]     |
| Zinc oxide | 70   | ZnSO <sub>4</sub> ·H <sub>2</sub> O  | Coccygeal vertebrae | SR | N – 32mg/kg | 5, 10, 20, 40, 80 | Wedekind et al., 1994 [200]     |
| Zinc oxide | 87   | ZnSO <sub>4</sub> ·H <sub>2</sub> O  | Pla Zn              | SR | N – 32mg/kg | 5, 10, 20, 40, 80 | Wedekind et al., 1994 [200]     |

Pan = pancreatic; Abs = absorption; Pla = plasma; Liv = liver; Kid = kidney; SR = slope ratio, MR = mean ratio; N = natural; Ser = serum; Per = performance;

## References:

1. Ammerman, C.B.; Baker, D.H.; Lewis, A.J. Preface. In *Bioavailability of Nutrients for Animals*, Ammerman, C.B., Baker, D.H., Lewis, A.J., Eds. Academic Press: San Diego, 1995; <https://doi.org/10.1016/B978-012056250-3/50026-3>pp. xiii-xiv.
2. De Groote, G.; Lippens, M.; Jongbloed, A.W. and Meschy, F. *Study on the bioavailability of major and trace minerals*; International Association of the European (EU) Manufacturers of Major, Trace and Specific Feed mineral Materials (Emfema): Brussels, 2002.
3. Ward, J.D.; Spears, J.W.; Kegley, E.B. Bioavailability of copper proteinate and copper carbonate relative to copper sulfate in cattle. *J. Dairy Sci.* **1996**, *79*, 127-132, doi:10.3168/jds.S0022-0302(96)76343-9.
4. Engle, T.E.; Spears, J.W. Effects of dietary copper concentration and source on performance and copper status of growing and finishing steers. *J. Anim. Sci.* **2000**, *78*, 2446-2451, doi:10.2527/2000.7892446x.
5. VanValin, K.R.; Genther-Schroeder, O.N.; Laudert, S.B.; Hansen, S.L. Relative bioavailability of organic and hydroxy copper sources in growing steers fed a high antagonist diet. *J. Anim. Sci.* **2019**, *97*, 1375-1383, doi:10.1093/jas/sky487.
6. Hansen, S.L.; Schlegel, P.; Legleiter, L.R.; Lloyd, K.E.; Spears, J.W. Bioavailability of copper from copper glycinate in steers fed high dietary sulfur and molybdenum. *J. Anim. Sci.* **2008**, *86*, 173-179, doi:10.2527/jas.2006-814.
7. Kegley, E.B.; Spears, J.W. Bioavailability of feed-grade copper sources (oxide, sulfate, or lysine) in growing cattle. *J. Anim. Sci.* **1994**, *72*, 2728-2734, doi:10.2527/1994.72102728x.
8. Chase, C.R.; Beede, D.K.; Van Horn, H.H.; Shearer, J.K.; Wilcox, C.J.; Donovan, G.A. Responses of lactating dairy cows to copper source, supplementation rate, and dietary antagonist (Iron). *J. Dairy Sci.* **2000**, *83*, 1845-1852, doi:[https://doi.org/10.3168/jds.S0022-0302\(00\)75055-7](https://doi.org/10.3168/jds.S0022-0302(00)75055-7).
9. Nockels, C.F.; DeBonis, J.; Torrent, J. Stress induction affects copper and zinc balance in calves fed organic and inorganic copper and zinc sources. *J. Anim. Sci.* **1993**, *71*, 2539-2545, doi:10.2527/1993.7192539x.
10. Ward, J.D.; Spears, J.W.; Kegley, E.B. Effect of copper level and source (copper lysine vs copper sulfate) on copper status, performance, and immune response in growing steers fed diets with or without supplemental molybdenum and sulfur. *J. Anim. Sci.* **1993**, *71*, 2748-2755, doi:10.2527/1993.71102748x.

11. Kincaid, R.L.; Blauwiekel, R.M.; Cronrath, J.D. Supplementation of Copper as Copper Sulfate or Copper Proteinate for Growing Calves Fed Forages Containing Molybdenum. *J. Dairy Sci.* **1986**, *69*, 160-163, doi:10.3168/jds.S0022-0302(86)80381-2.
12. Wittenberg, K.M.; Boila, R.J.; Shariff, M.A. Comparison of copper sulfate and copper proteinate as copper sources for copper-depleted steers fed high molybdenum diets. *Can. J. Anim. Sci.* **1990**, *70*, 895-904, doi:10.4141/cjas90-108.
13. Du, Z.; Hemken, R.W.; Harmon, R.J. Copper Metabolism of Holstein and Jersey Cows and Heifers Fed Diets High in Cupric Sulfate or Copper Proteinate. *J. Dairy Sci.* **1996**, *79*, 1873-1880, doi:https://doi.org/10.3168/jds.S0022-0302(96)76555-4.
14. Ivan, M.; Proulx, J.G.; Morales, R.; Codagnone, H.C.V.; Dayrell, M.d.S. Copper accumulation in the liver of sheep and cattle fed diets supplemented with copper sulfate or copper chloride. *Can. J. Anim. Sci.* **1990**, *70*, 727-730, doi:10.4141/cjas90-089.
15. Xin, Z.; Waterman, D.F.; Hemken, R.W.; Harmon, R.J.; Jackson, J.A. Effects of Copper Sources and Dietary Cation-Anion Balance on Copper Availability and Acid-Base Status in Dairy Calves. *J. Dairy Sci.* **1991**, *74*, 3167-3173, doi:https://doi.org/10.3168/jds.S0022-0302(91)78502-0.
16. Miltimore, J.E.; Kalnin, C.M.; Clapp, J.B. Copper storage in the livers of cattle supplemented with injected copper and with copper sulfate and chelated copper. *Can. J. Anim. Sci.* **1978**, *58*, 525-529, doi:10.4141/cjas78-068.
17. Spears, J.W.; Kegley, E.B.; Mullis, L.A. and Wise, T.A. Bioavailability of copper from tri-basic copper chloride in cattle. *J. Anim. Sci.* **1997**, *75*, 265.
18. Spears, J.; Kegley, E.; Mullis, L. Bioavailability of copper from tribasic copper chloride and copper sulfate in growing cattle. *Anim. Feed Sci. Technol.* **2004**, *116*, 1-13, doi:10.1016/j.anifeedsci.2004.06.002.
19. Kim, J.W.; Kil, D.Y. Determination of relative bioavailability of copper in tribasic copper chloride to copper in copper sulfate for broiler chickens based on liver and feather copper concentrations. *Anim. Feed Sci. Technol.* **2015**, *210*, 138-143, doi:https://doi.org/10.1016/j.anifeedsci.2015.09.022.
20. Kim, J.W.; Kim, J.H.; Shin, J.E.; Kil, D.Y. Relative bioavailability of copper in tribasic copper chloride to copper in copper sulfate for laying hens based on egg yolk and feather copper concentrations. *Poult. Sci.* **2016**, *95*, 1591-1597, doi:https://doi.org/10.3382/ps/pew049.
21. Pott, E.B.; Henry, P.R.; Ammerman, C.B.; Merritt, A.M.; Madison, J.B.; Miles, R.D. Relative bioavailability of copper in a copperlysine complex for chicks and lambs. *Anim. Feed Sci. Technol.* **1994**, *45*, 193-203, doi:https://doi.org/10.1016/0377-8401(94)90026-4.
22. Baker, D.H.; Odle, J.; Funk, M.A.; Wieland, T.M. Research note: bioavailability of copper in cupric oxide, cuprous oxide, and in a copper-lysine complex. *Poult. Sci.* **1991**, *70*, 177-179, doi:10.3382/ps.0700177.
23. Aoyagi, S.; Baker, D.H. Nutritional evaluation of copper-lysine and zinc-lysine complexes for chicks. *Poult. Sci.* **1993b**, *72*, 165-171, doi:10.3382/ps.0720165.
24. Aoyagi, S.; Baker, D.H. Nutritional evaluation of a copper-methionine complex for chicks. *Poult. Sci.* **1993d**, *72*, 2309-2315, doi:https://doi.org/10.3382/ps.0722309.
25. Aoyagi, S.; Baker, D.H.; Wedekind, K.J. Estimates of copper bioavailability from liver of different animal species and from feed ingredients derived from plants and animals. *Poult. Sci.* **1993**, *72*, 1746-1755, doi:https://doi.org/10.3382/ps.0721746.
26. Guo, R.; Henry, P.R.; Holwerda, R.; Cao, J.; Littell, R.C.; Miles, R.D.; Ammerman, C.B. Chemical characteristics and relative bioavailability of supplemental organic copper sources for poultry. *J. Anim. Sci.* **2001**, *79*, 1132-1141.
27. Rong-fu, G.; Kelin, C.; Xi, Z. Bioavailability of copper from tribasic copper chloride, copper amino acid chelate or copper proteinate for broilers. In Proceedings of Materials Science.

28. Miles, R.; Henry, P.; Sampath, V.; Shivazad, M.; Comer, C. Relative Bioavailability of Novel Amino Acid Chelates of Manganese and Copper for Chicks. *J. Appl. Poult. Res* **2003**, *12*, 417-423, doi:10.1093/japr/12.4.417.
29. Wang, Z.; Cerrate, S.; Coto, C.; Yan, F.; Waldroup, P. Evaluation of Mintrex® copper as source of copper in broiler diets. *Int. J. Poult. Sci.* **2007**, *6*, 308-313, doi:10.3923/ijps.2007.308.313.
30. McNaughton, J.L.; Day, E.J.; Dilworth, B.C.; Lott, B.D. Iron and copper availability from various sources. *Poult. Sci.* **1974**, *53* 4, 1325-1330.
31. Liu, S.; Lu, L.; Li, S.; Xie, J.; Zhang, L.; Wang, R.; Luo, X. Copper in organic proteinate or inorganic sulfate form is equally bioavailable for broiler chicks fed a conventional corn-soybean meal diet. *Biol. Trace Elem. Res.* **2012**, *147*, 142-148, doi:10.1007/s12011-012-9329-5.
32. Norvell, M.J.; Thomas, M.C.; Goatcher, W.D.; Gable, D.A.; Calvert, C.C. Some effects of high dietary levels of various salts of copper in broiler chickens. In Proceedings of University of Missouri's Annual Conference on Trace Substances in Environmental Health, Columbia, MO, USA, 11 June 1974; pp. 367-372.
33. Ledoux, D.R.; Ammerman, C.B.; Miles, R.D. Biological availability of copper sources for broiler chicks. *Poultry Sci.* **1987**, *66*.
34. Ledoux, D.R.; Henry, P.R.; Ammerman, C.B.; Rao, P.V.; Miles, R.D. Estimation of the relative bioavailability of inorganic copper sources for chicks using tissue uptake of copper. *J. Anim. Sci.* **1991**, *69* 1, 215-222.
35. Aoyagi, S.; Baker, D.H. Bioavailability of copper in analytical-grade and feed-grade inorganic copper sources when fed to provide copper at levels below the chick's requirement. *Poult. Sci.* **1993a**, *72*, 1075-1083, doi:https://doi.org/10.3382/ps.0721075.
36. Zanetti, M.A.; Henry, P.R.; Ammerman, C.B.; Miles, R.D. Estimation of the relative bioavailability of copper sources in chicks fed on conventional dietary amounts. *Br. Poult. Sci.* **1991**, *32*, 583-588, doi:10.1080/00071669108417383.
37. Miles, R.D.; O'Keefe, S.F.; Henry, P.R.; Ammerman, C.B.; Luo, X.G. The effect of dietary supplementation with copper sulfate or tribasic copper chloride on broiler performance, relative copper bioavailability, and dietary prooxidant activity. *Poult. Sci.* **1998**, *77*, 416-425, doi:10.1093/ps/77.3.416.
38. Luo, X.G.; Ji, F.; Lin, Y.X.; Steward, F.A.; Lu, L.; Liu, B.; Yu, S.X. Effects of dietary supplementation with copper sulfate or tribasic copper chloride on broiler performance, relative copper bioavailability, and oxidation stability of vitamin E in feed. *Poult. Sci.* **2005**, *84*, 888-893, doi:10.1093/ps/84.6.888.
39. Liu, Z.; Bryant, M.; Roland, D.A. Layer Performance and Phytase Retention as Influenced by Copper Sulfate Pentahydrate and Tribasic Copper Chloride. *J. Appl. Poult. Res* **2005**, *14*, 499-505, doi:10.1093/japr/14.3.499.
40. Norvell, M.J.; Gable, D.A.; Thomas, M.C. Effects of feeding high levels of various copper salts to broiler chickens. In Proceedings of Annual conference on trace substances in environmental health Columbia, MO, USA.
41. Miles, R.D.; Ammerman, C.B.; Henry, P.R.; O'Keefe, S.F. The influence of high dietary copper supplementation from two feed grade inorganic sources on broiler performance, tissue copper accumulation and dietary prooxidant activity. *Poult. Sci.* **1994**, *73*.
42. Jackson, N.; Stevenson, M.H. A study of the effects of dietary added cupric oxide on the laying, domestic fowl and a comparison with the effects of hydrated copper sulphate. *Br. J. Nutr.* **1981**, *45*, 99-110, doi:10.1079/bjn19810082.
43. Aoyagi, S.; Hiney, K.M.; Baker, D.H. Copper bioavailability in pork liver and in various animal by-products as determined by chick bioassay. *J. Anim. Sci.* **1995**, *73*, 799-804, doi:10.2527/1995.733799x.
44. Izquierdo, O.A.; Baker, D.H. Bioavailability of copper in pig feces. *C. J. Anim. Sci.* **1986**, *66*, 1145-1148, doi:10.4141/cjas86-127.

45. Hatfield, P.G.; Swenson, C.K.; Kott, R.W.; Ansotegui, R.P.; Roth, N.J.; Robinson, B.L. Zinc and copper status in ewes supplemented with sulfate- and amino acid-complexed forms of zinc and copper. *J. Anim. Sci.* **2001**, *79*, 261-266, doi:10.2527/2001.791261x.
46. Ledoux, D.R.; Pott, E.B.; Henry, P.R.; Ammerman, C.B.; Merritt, A.M.; Madison, J.B. Estimation of the relative bioavailability of inorganic copper sources for sheep. *Nutr. Res.* **1995**, *15*, 1803-1813, doi:https://doi.org/10.1016/0271-5317(95)02049-7.
47. Macpherson, A.; Hemingway, R.G. Effects of liming and various forms of oral copper supplementation on the copper status of grazing sheep. *J. Sci. Food Agric.* **1968**, *19*, 53-56, doi:10.1002/jsfa.2740190111.
48. Luo, X.G.; Henry, P.R.; Ammerman, C.B.; Madison, J.B. Relative bioavailability of copper in a copper-lysine complex or copper sulfate for ruminants as affected by feeding regimen. *Anim. Feed Sci. Technol.* **1996**, *57*, 281-289.
49. Pal, D.T.; Gowda, N.K.; Prasad, C.S.; Amarnath, R.; Bharadwaj, U.; Suresh Babu, G.; Sampath, K.T. Effect of copper- and zinc-methionine supplementation on bioavailability, mineral status and tissue concentrations of copper and zinc in ewes. *J. Trace Elem. Med. Biol. Organ Soc. Miner. Trace Elem. (GMS)* **2010**, *24*, 89-94, doi:10.1016/j.jtemb.2009.11.007.
50. Eckert, G.; Greene, L.; Carstens, G.; Ramsey, W. Copper status of ewes fed increasing amounts of copper from copper sulfate or copper proteinate. *J. Anim. Sci.* **1999**, *77*, 244-249, doi:10.2527/1999.771244x.
51. Charmley, L.L.; Ivan, M. The relative accumulation of copper in the liver and kidneys of sheep fed corn silage supplemented with copper chloride, copper acetate or copper sulphate. *Can. J. Anim. Sci.* **1989**, *69*, 205-214, doi:10.4141/cjas89-024.
52. Dick, A. Studies on the assimilation and storage of copper in crossbred sheep. *Aus. J. Agri. Res.* **1954**, *5*, 511-555, doi:https://doi.org/10.1071/AR9540511.
53. Suttle, N.F. Effects of organic and inorganic sulphur on the availability of dietary copper to sheep. *Br. J. Nutr.* **1974b**, *32*, 559-568, doi:10.1079/bjn19740109.
54. Prince, T.J.; Hays, V.W.; Cromwell, G.L. Environmental effects of high copper pig manure on pastures for sheep. *J. Anim. Sci.* **1975**, *41*.
55. Dalgarno, A.C.; Mills, C.F. Retention by sheep of copper from aerobic digests of pig faecal slurry. *J. Agri. Sci.* **1975**, *85*, 11-18, doi:10.1017/s0021859600053363.
56. Suttle, N.F.; Price, J. The potential toxicity of copper-rich animal excreta to sheep. *Anim. Sci.* **1976**, *23*, 233-241, doi:10.1017/s0003356100031317.
57. Poole, D.B.R.; McGrath, D.; Fleming, G.A.; Moore, W. Effects of Applying Copper-Rich Pig Slurry to Grassland: 4. Sheep Feeding Experiments. *Irish J. Agric. Res.* **1990**, *29*, 35-40.
58. Dowdy, R.P.; Matrone, G. A Copper-Molybdenum Complex: Its effects and movement in the piglet and sheep. *J. Nutr.* **1968**, *95*, 197-201, doi:10.1093/jn/95.2.197.
59. Cromwell, G.L.; Lindemann, M.D.; Monegue, H.J.; Hall, D.D.; Orr, D.E., Jr. Tribasic copper chloride and copper sulfate as copper sources for weanling pigs. *J. Anim. Sci.* **1998**, *76*, 118-123, doi:10.2527/1998.761118x.
60. Apgar, G.A.; Kornegay, E.T.; Lindemann, M.D.; Notter, D.R. Evaluation of copper sulfate and a copper lysine complex as growth promoters for weanling swine. *J. Anim. Sci.* **1995**, *73*, 2640-2646, doi:10.2527/1995.7392640x.
61. Apgar, G.A.; Kornegay, E.T. Mineral balance of finishing pigs fed copper sulfate or a copper-lysine complex at growth-stimulating levels. *J. Anim. Sci.* **1996**, *74*, 1594-1600, doi:10.2527/1996.7471594x.
62. Coffey, R.D.; Cromwell, G.L.; Monegue, H.J. Efficacy of a copper-lysine complex as a growth promotant for weanling pigs. *J. Anim. Sci.* **1994**, *72*, 2880-2886, doi:10.2527/1994.72112880x.
63. Bunch, R.J.; McCall, J.T.; Speer, V.C.; Hays, V.W. Copper supplementation for weanling pigs. *J. Anim. Sci.* **1965**, *24*, 995-1000, doi:10.2527/jas1965.244995x.

- 
64. Lin, G.; Guo, Y.; Liu, B.; Wang, R.; Su, X.; Yu, D.; He, P. Optimal dietary copper requirements and relative bioavailability for weanling pigs fed either copper proteinate or tribasic copper chloride. *J. Anim. Sci. Biotechnol.* **2020**, *11*, 54, doi:10.1186/s40104-020-00457-y.
65. Allen, M.M.; Barber, R.S.; Braude, R.; Mitchell, K.G. Further studies on various aspects of the use of high-copper supplements for growing pigs. *Br. J. Nutr.* **1961**, *15*, 507-522, doi:10.1079/bjn19610064.
66. Buescher, R.G.; Griffin, S.A.; Bell, M.C. Copper availability to swine from Cu64 labelled inorganic compounds. *J. Anim. Sci.* **1961**, *20*, 529-531, doi:10.2527/jas1961.203529x.
67. Bunch, R.J.; Speer, V.C.; Hays, V.W.; Hawbaker, J.H.; Catron, D.V. Effects of copper sulfate, copper oxide and chlortetracycline on baby pig performance. *J. Anim. Sci.* **1961**, *20*, 723-726, doi:10.2527/jas1961.204723x.
68. Bunch, R.J.; Speer, V.C.; Hays, V.W.; McCall, J.T. Effects of high levels of copper and chlortetracycline on performance of pigs. *J. Anim. Sci.* **1963**, *22*, 56-60, doi:10.2527/jas1963.22156x.
69. Bekaert, H.; Eeckhout, W.; Buysse, F. The effect of CuSO<sub>4</sub> and CuO, the granulometric characteristics of CuSO<sub>4</sub> and a zinc supplementation on performance, carcass quality and liver copper status of pigs. *Landbouwtijdschrift* **1967**, *20*, 1571 - 1585.
70. Cromwell, G.L.; Stahly, T.S.; Monegue, H.J. Effects of source and level of copper on performance and liver copper stores in weanling pigs. *J. Anim. Sci.* **1989**, *67*, 2996-3002, doi:10.2527/jas1989.67112996x.
71. Barber, R.S.; Bowland, J.P.; Mithcell, K.G.; Porter, J.W.G. Copper sulphate and copper sulphide (CuS) as supplements for growing pigs. *Br. J. Nutr.* **1961**, *15*, 189-197, doi:10.1079/bjn19610024.
72. Bowland, J.P.; Braode, R.; Chamberlain, A.G.; Glascock, R.F.; Mitchell, K.G. The absorption, distribution and excretion of labelled copper in young pigs given different quantities, as sulphate or sulphide, orally or intravenously. *Br. J. Nutr.* **1961**, *15*, 59-72, doi:10.1079/bjn19610008.
73. Cromwell, G.L.; Clark, T.L. Effects of copper sulfate, copper sulfide and sodium sulfide on performance and copper stores of pigs. *J. Anim. Sci.* **1978**, *46*, 692-698, doi:10.2527/jas1978.463692x.
74. Bremner, I.; Dalgarno, A.C. Iron metabolism in the veal calf. The availability of different iron compounds. *Br. J. Nutr.* **1973**, *29*, 229-243, doi:10.1079/bjn19730098.
75. McGuire, S.O.; Miller, W.J.; Gentry, R.P.; Neathery, M.W.; Ho, S.Y.; Blackmon, D.M. Influence of high dietary iron as ferrous carbonate and ferrous sulfate on iron metabolism in young calves. *J. Dairy Sci.* **1985**, *68*, 2621-2628, doi:10.3168/jds.S0022-0302(85)81146-2.
76. Miller, W.J.; Gentry, R.P.; Blackmon, D.M.; Fosgate, H.H. Effects of High Dietary Iron as Ferrous Carbonate on Performance of Young Dairy Calves. *J. Dairy Sci.* **1991**, *74*, 1963-1967, doi:10.3168/jds.S0022-0302(91)78363-X.
77. Chausow, D.G.; Czarnecki-Maulden, G.L. The relative bioavailability of iron from feedstuffs of plant and animal origin to the chick. *Nutr. Res.* **1988b**, *8*, 175-185, doi:https://doi.org/10.1016/S0271-5317(88)80021-6.
78. Chausow, D.G.; Czarnecki-Maulden, G.L. The relative bioavailability of plant and animal sources of iron to the cat and chick. *Nutr. Res.* **1988a**, *8*, 1041 - 1050.
79. Fly, A.D.; Fahey, G.C.; Czarnecki-Maulden, G.L. Iron bioavailability from diets containing isolated or intact sources of lignin. *Biol. Trace Elem. Res.* **1998**, *62*, 83-100, doi:10.1007/bf02820024.
80. Pla, G.W.; Fritz, J.C. Availability of Iron. *J. Assoc. Off. Anal. Chem.* **1970**, *53*.
81. Fritz, J.C.; Pla, G.W.; Roberts, T.; Boehne, J.W.; Hove, E.L. Biological availability in animals of iron from common dietary sources. *J. Agric. Food Chem.* **1970**, *18*, 647-651, doi:10.1021/jf60170a031.
82. Deming, J.G.; Czarnecki-Maulden, G.L. Iron bioavailability in calcium and phosphorus sources. *J. Anim. Sci.* **1989**, *67*.

- 
83. Boling, S.D.; Edwards, H.M., 3rd; Emmert, J.L.; Biehl, R.R.; Baker, D.H. Bioavailability of iron in cottonseed meal, ferric sulfate, and two ferrous sulfate by-products of the galvanizing industry. *Poult. Sci.* **1998**, *77*, 1388-1392, doi:10.1093/ps/77.9.1388.
  84. Henry, P.R.; Ammerman, C.B.; Miles, R.D.; Littell, R.C. Relative bioavailability of iron in feed grade phosphates for chicks. *J. Anim. Sci.* **1992**, *70*.
  85. Ma, X.Y.; Liu, S.B.; Lu, L.; Li, S.F.; Xie, J.J.; Zhang, L.Y.; Zhang, J.H.; Luo, X.G. Relative bioavailability of iron proteinate for broilers fed a casein-dextrose diet. *Poult. Sci.* **2014**, *93*, 556-563, doi:10.3382/ps.2013-03296.
  86. Cao, J.; Luo, X.G.; Henry, P.R.; Ammerman, C.B.; Littell, R.C.; Miles, R.D. Effect of dietary iron concentration, age, and length of iron feeding on feed intake and tissue iron concentration of broiler chicks for use as a bioassay of supplemental iron sources. *Poult. Sci.* **1996**, *75*, 495-504, doi:https://doi.org/10.3382/ps.0750495.
  87. Zhang, L.Y.; Lu, L.; Luo, X.G. The chemical characteristics of organic iron sources and their relative bioavailabilities for broilers fed a conventional corn-soybean meal diet. *J. Anim. Sci.* **2016**, *94*, 2378-2396, doi:10.2527/jas.2016-0297.
  88. Amine, E.K.; Neff, R.; Hegsted, D.M. Biological estimation of available iron using chicks or rats. *J. Agric. Food Chem.* **1972**, *20*, 246-251, doi:10.1021/jf60180a051.
  89. Pla, G.W.; Fritz, J.C. Collaborative Study of the Hemoglobin Repletion Test in Chicks and Rats for Measuring Availability of Iron. *J. Assoc. Off. Anal. Chem.* **1971**, *54*, 13-17, doi:10.1093/jaoac/54.1.13.
  90. Pennell, M.D.; Davies, M.I.; Rasper, J.; Motzok, I. Biological availability of iron supplements for rats, chicks and humans. *J. Nutr.* **1976**, *106*, 265-274, doi:10.1093/jn/106.2.265.
  91. Elvehjem, C.A.; Hart, E.B. The relation of iron and copper to hemoglobin synthesis in the chick. *J. Biol. Chem.* **1929**, *84*, 131-141.
  92. Poitevin, A.L. Determination of the true biological availability of ferrous carbonate. *Feedstuffs* **1979**, *51*, 31.
  93. Moore, J.R.; Hitchcock, J.P.; Miller, L.C. Effect of nickel level, iron level and iron form on performance, hematological and mineral parameters of broiler chicks. *J. Anim. Sci.* **1988**, *66*, 326.
  94. Ammerman, C.B.; Henry, P.R.; Miles, R.D.; Littell, R.C. Feed grade phosphates and iron sulfates as sources of iron for animals. In Proceedings of Trace Elements in Man and Animals - TEMA 8, Gersdorf, Germany.
  95. Pla, G.W.; Harrison, B.N.; Fritz, J.C. Comparison of Chicks and Rats as Test Animals for Studying Bioavailability of Iron, with Special Reference to Use of Reduced Iron in Enriched Bread. *J. Assoc. Off. Anal. Chem.* **1973**, *56*, 1369-1373, doi:10.1093/jaoac/56.6.1369.
  96. Aoyagi, S.; Baker, D.H. Iron requirement of chicks fed a semipurified diet based on casein and soy protein concentrate. *Poult. Sci.* **1995**, *74*, 412-415, doi:10.3382/ps.0740412.
  97. Biehl, R.R.; Emmert, J.L.; Baker, D.H. Iron bioavailability in soybean meal as affected by supplemental phytase and 1 alpha-hydroxycholecalciferol. *Poult. Sci.* **1997**, *76*, 1424-1427, doi:10.1093/ps/76.10.1424.
  98. Van Ravenswaay, R.O.; Henry, P.; Ammerman, C. Effects of time and dietary iron on tissue iron concentration as an estimate of relative bioavailability of supplemental iron sources for ruminants. *Anim. Feed Sci. Technol.* **2001**, *90*, 185-198, doi:10.1016/s0377-8401(01)00208-5.
  99. Harmon, B.G.; Becker, D.E.; Jensen, A.H. Efficacy of Ferric Ammonium Citrate in Preventing Anemia in Young Swine. *J. Anim. Sci.* **1967**, *26*, 1051-1053, doi:10.2527/jas1967.2651051x.
  100. Miller, E.R.; Parsons, M.J.; Ullrey, D.E.; Ku, P.K. Bioavailability of Iron from Ferric Choline Citrate and a Ferric Copper Cobalt Choline Citrate Complex for Young Pigs. *J. Anim. Sci.* **1981**, *52*, 783-787, doi:10.2527/jas1981.524783x.
  101. Ullrey, D.E.; Miller, E.R.; Hitchcock, J.P.; Ku, P.K.; Covert, R.L.; Hegenauer, J.; Saltman, P. Oral ferric citrate vs ferrous sulfate for prevention of baby pig anemia. *Michigan Agric. Exp. Sta. Rep.* **1973**, *232*, 34-38.

102. Pickett, R.A.; Plumlee, M.P.; Beeson, W.M. Availability of dietary iron in different compounds for young pigs. *J. Anim. Sci.* **1961**, *20*, 946.
103. Anderson, T.A.; Filer, L.J., Jr.; Fomon, S.J.; Andersen, D.W.; Nixt, T.L.; Rogers, R.R.; Jensen, R.L.; Nelson, S.E. Bioavailability of different sources of dietary iron fed to Pitman-Moore miniature pigs. *J. Nutr.* **1974**, *104*, 619–628, doi:10.1093/jn/104.5.619.
104. Ammerman, C.B.; Standish, J.F.; Holt, C.E.; Houser, R.H.; Miller, S.M.; Combs, G.E. Ferrous carbonates as sources of iron for weanling pigs and rats. *J. Anim. Sci.* **1974**, *38*, 52–58, doi:10.2527/jas1974.38152x.
105. Harmon, B.G.; Hoge, D.E.; Jensen, A.H.; Baker, D.H. Efficacy of Ferrous Carbonate as a Hematinic for Young Swine. *J. Anim. Sci.* **1969**, *29*, 706–710, doi:10.2527/jas1969.295706x.
106. Miller, E.R. Biological availability of iron in iron supplements. *Feedstuffs* **1978**, *50*, 20.
107. Kuznetsov, S.G. Biological availability of iron from different chemical compounds for piglets. *Soviet Agric. Sci.* **1987**, *12*, 32–36.
108. Spears, J.W.; Schoenherr, W.D.; Kegley, E.B.; Flowers, W.L.; Alhusen, H.D. Efficacy of iron methionine as a source of iron for nursing pigs. *J. Anim. Sci.* **1992**, *70*, 243.
109. Lewis, A.; Miller, P.S.; Wolverton, C. *Bioavailability of Iron in two different sources for weanling pigs*; Animal science department, University of Nebraska: Lincoln, USA, 1996.
110. Brady, P.S.; Ku, P.K.; Ullrey, D.E.; Miller, E.R. Evaluation of an amino acid-iron chelate hematinic for the baby pig. *J. Anim. Sci.* **1978**, *47*, 1135–1140, doi:10.2527/jas1978.4751135x.
111. Kim, S.W.; Hulbert, L.E.; Rachunyo, H.A.; McGlone, J.J. Relative Availability of Iron in Mined Humic Substances for Weanling Pigs. *Asian-Australas. J. Anim. Sci.* **2004**, *17*, 1266–1270.
112. Kornegay, E.T. Availability of Iron Contained in Defluorinated Phosphate. *J. Anim. Sci.* **1972**, *34*, 569–572, doi:10.2527/jas1972.344569x.
113. Schaible, P.; Bandemer, S.L.; Davidson, J. The manganese content of feedstuffs and its relation to poultry nutrition. In *Manganese content feed. its relat. poult. nutr.*, Michigan State Coll. Agric. Exp. Stat.: 1938; p 32.
114. Gallup, W.D.; Norris, L.C. The Amount of Manganese Required to Prevent Perosis in the Chick. *Poult. Sci.* **1939**, *18*, 76–82, doi:https://doi.org/10.3382/ps.0180076.
115. Scheideler, S.E. Interaction of dietary calcium, manganese, and manganese source (Mn oxide or Mn methionine complex) on chick performance and manganese utilization. *Biol. Trace Elem. Res.* **1991**, *29*, 217–228, doi:10.1007/bf03032679.
116. Fly, A.D.; Izquierdo, O.A.; Lowry, K.R.; Baker, D.H. Manganese bioavailability in a Mn-methionine chelate. *Nutr. Res.* **1989**, *9*, 901–910.
117. Henry, P.R.; Ammerman, C.B.; Miles, R.D. Relative bioavailability of manganese in a manganese-methionine complex for broiler chicks. *Poult. Sci.* **1989**, *68*, 107–112, doi:10.3382/ps.0680107.
118. Black, J.R.; Ammerman, C.B.; Henry, P.R.; Miles, R.D. Biological availability of manganese sources and effects of high dietary manganese on tissue mineral composition of broiler-type chicks. *Poult. Sci.* **1984**, *63*, 1999–2006, doi:10.3382/ps.0631999.
119. Watson, L.T.; Ammerman, C.B.; Miller, S.M.; Harms, R.H. Biological Assay of Inorganic Manganese for Chicks. *Poult. Sci.* **1970**, *49*, 1548–1554, doi:https://doi.org/10.3382/ps.0491548.
120. Wong-Valle, J.; Ammerman, C.B.; Henry, P.R.; Rao, P.V.; Miles, R.D. Bioavailability of manganese from feed grade manganese oxides for broiler chicks. *Poult. Sci.* **1989a**, *68*, 1368–1373, doi:10.3382/ps.0681368.
121. Watson, L.T.; Ammerman, C.B.; Miller, S.M.; Harms, R.H. Biological availability to chicks of manganese from different inorganic sources. *Poult. Sci.* **1971**, *50*, 1693–1700.

122. Baker, D.H.; Halpin, K.M. Efficacy of a manganese-protein chelate compared with that of manganese sulfate for chicks. *Poult. Sci.* **1987**, *66*, 1561-1563, doi:10.3382/ps.0661561.
123. Smith, M.O.; Sherman, I.L.; Miller, L.C.; Robbins, K.R.; Halley, J.T. Relative biological availability of manganese from manganese proteinate, manganese sulfate, and manganese monoxide in broilers reared at elevated temperatures. *Poult. Sci.* **1995**, *74*, 702-707, doi:10.3382/ps.0740702.
124. Wang, F.; Lu, L.; Li, S.; Liu, S.; Zhang, L.; Yao, J.; Luo, X. Relative bioavailability of manganese proteinate for broilers fed a conventional corn-soybean meal diet. *Biol. Trace Elem. Res.* **2012**, *146*, 181-186, doi:10.1007/s12011-011-9238-z.
125. Saldanha, M.M.; Araújo, I.C.S.; Triguineli, M.V.; Vaz, D.P.; Ferreira, F.N.A.; Albergaria, J.D.S.; Fontes, D.O.; Lara, L.J.C. Relative bioavailability of manganese in relation to proteinate and sulfate sources for broiler chickens from one to 20 d of age. *Poult. Sci.* **2020**, *99*, 5647-5652, doi:https://doi.org/10.1016/j.psj.2020.05.006.
126. Li, S.; Luo, X.; Liu, B.; Crenshaw, T.D.; Kuang, X.; Shao, G.; Yu, S. Use of chemical characteristics to predict the relative bioavailability of supplemental organic manganese sources for broilers1. *J. Anim. Sci.* **2004**, *82*, 2352-2363, doi:10.2527/2004.8282352x.
127. Luo, X.; Li, S.; Liu, B.; Bu, Y.; Kuang, X.; Yu, S. Bioavailabilities of manganese sources based on heart manganese-containing superoxide dismutase gene expression for broilers. *Wei Sheng Yan Jiu = J. Hyg. Res.* **2004**, *33*, 681-686.
128. Li, S.F.; Luo, X.G.; Lu, L.; Crenshaw, T.D.; Bu, Y.; Liu, B.; Kuang, X.; Shao, G.Z.; Yu, S.X. Bioavailability of organic manganese sources in broilers fed high dietary calcium. *Anim. Feed Sci. Technol.* **2005**, *123*, 703-715.
129. Yan, F.; Waldroup, P. Evaluation of Mintrex® manganese as a source of manganese for young broilers. *Int. J. Poult. Sci.* **2006**, *5*, 708-713.
130. Southern, L.L.; Baker, D.H. Excess manganese ingestion in the chick. *Poult. Sci.* **1983**, *62*, 642-646, doi:10.3382/ps.0620642.
131. Henry, P.R.; Ammerman, C.B.; Miles, R.D. Bioavailability of manganese sulfate and manganese monoxide in chicks as measured by tissue uptake of manganese from conventional dietary levels. *Poult. Sci.* **1986**, *65*, 983-986, doi:10.3382/ps.0650983.
132. Luo, X. Studies on the optimal manganese level and its bioavailability in a practical diet for broiler chicks. Chinese Academy of Agricultural Science, Beijing, China, 1989.
133. Korol, W.; Wójcik, S.; Matyka, S.; Hansen, T.S. Availability of manganese from different manganese oxides and their effect on performance of broiler chickens. *J. Anim. Feed Sci.* **1996**, *5*, 273-279, doi:10.22358/jafs/69606/1996.
134. Henry, P.; Ammerman, C.; Miles, R. Bioavailability of manganese monoxide and manganese dioxide for broiler chicks. *Nutr. Rep. Int.* **1987**.
135. Brooks, M.A.; Grimes, J.L.; Lloyd, K.E.; Valdez, F.R.; Spears, J.W. Relative bioavailability in chicks of manganese from manganese propionate. *J. Appl. Poult. Res.* **2012**, *21*, 126-130.
136. Ao, T.; Pierce, J.L.; Pescatore, A.J.; Ford, M.J.; Cantor, A.H.; Dawson, K.A.; Paul, M. Evaluation of organic Mn (Bioplex Mn®) as a Mn source for chicks. *Poult. Sci.* **2008**, *87*, 172-173.
137. Black, J.R.; Ammerman, C.B.; Henry, P.R. Effects of high dietary manganese as manganese oxide or manganese carbonate in sheep. *J. Anim. Sci.* **1985**, *60*, 861-866, doi:10.2527/jas1985.603861x.
138. Wong-Valle, J.; Henry, P.R.; Ammerman, C.B.; Rao, P.V. Estimation of the relative bioavailability of manganese sources for sheep. *J. Anim. Sci.* **1989b**, *67*, 2409-2414, doi:10.2527/jas1989.6792409x.
139. Henry, P.R.; Ammerman, C.B.; Littell, R.C. Relative bioavailability of manganese from a manganese-methionine complex and inorganic sources for ruminants. *J. Dairy Sci.* **1992**, *75*, 3473-3478, doi:10.3168/jds.S0022-0302(92)78123-5.
140. Kayongo-Male, H.; Ullrey, D.E.; Miller, E.R. Manganese (Mn) nutrition of the pig. 2 The availability of Mn from different sources to the growing pig. *Bull. Anim. Health Prod. Africa* **1980**, *28*, 145-153.



- 
141. Neathery, M.W.; Rachmat, S.; Miller, W.J.; Gentry, R.P.; Blackmon, D.M. Effect of Chemical Form of Orally Administered 65Zn on Absorption and Metabolism in Cattle. *Proc. Soc. Exp. Biol. Med.* **1972**, *139*, 953-956, doi:10.3181/00379727-139-36274.
142. Kincaid, R.L. Biological availability of zinc from inorganic sources with excess dietary calcium. *J. Dairy Sci.* **1979**, *62*, 1081-1085, doi:10.3168/jds.S0022-0302(79)83378-0.
143. Engle, T.E.; Nockels, C.F.; Kimberling, C.V.; Weaber, D.L.; Johnson, A.B. Zinc repletion with organic or inorganic forms of zinc and protein turnover in marginally zinc-deficient calves. *J. Anim. Sci.* **1997**, *75*, 3074-3081, doi:10.2527/1997.75113074x.
144. Kincaid, R.L.; A.S. Hodgson, R.E. Riley, Jr. and J.D. Conrath. Supplementation of diets for lactating cows with zinc as zinc oxide and zinc methionine. *J. Dairy Sci.* **1984**, *67*, 103 [Abstract].
145. Greene, L.W.; Lunt, D.K.; Byers, F.M.; Chirase, N.K.; Richmond, C.E.; Knutson, R.E.; Schelling, G.T. Performance and carcass quality of steers supplemented with zinc oxide or zinc methionine. *J. Anim. Sci.* **1988**, *66*, 1818-1823, doi:10.2527/jas1988.6671818x.
146. Spears, J.W. Zinc Methionine for Ruminants: Relative Bioavailability of Zinc in Lambs and Effects of Growth and Performance of Growing Heifers. *J. Anim. Sci.* **1989**, *67*, 835-843, doi:10.2527/jas1989.673835x.
147. Spears, J.W.; Kegley, E.B. Effect of zinc and manganese methionine on performance of beef cows and calves. *J. Anim. Sci.* **1991**, *69*, 59 [Abstract].
148. Miller, W.J.; Blackmon, D.M.; Hiers, J.M., Jr.; Fowler, P.R.; Clifton, C.M.; Gentry, R.P. Effects of adding two forms of supplemental zinc to a practical diet on skin regeneration in Holstein heifers and evaluation of a procedure for determining rate of wound healing. *J. Dairy Sci.* **1967**, *50*, 715-721, doi:10.3168/jds.S0022-0302(67)87499-X.
149. Miller, W.J.; Blackmon, D.M.; Gentry, R.P.; Pate, F.M. Effects of High but Nontoxic Levels of Zinc in Practical Diets on 65Zn and Zinc Metabolism in Holstein Calves. *J. Nutr.* **1970**, *100*, 893-902, doi:10.1093/jn/100.8.893.
150. Kennedy, D.W., W.M. Craig, L.L. Southern and M. Engstrom. Ruminal partitioning of zinc in steers fed a polysaccharide complex of zinc or zinc oxide. *J. Anim. Sci.* **1988**, *66*, 462.
151. Hempe, J.M. Zinc bioavailability in the chick [Doctor Degree Thesis Dissertation]. University of Missouri, Columbia, 1987.
152. Hortin, A.E.; Bechtel, P.J.; Baker, D.H. Efficacy of pork loin as a source of zinc and effect of added cysteine on zinc bioavailability. *J. Food Sci.* **1991**, *56*, 1505-1507, doi:https://doi.org/10.1111/j.1365-2621.1991.tb08626.x.
153. O'Dell, B.L.; Burpo, C.E.; Savage, J.E. Evaluation of Zinc Availability in Foodstuffs of Plant and Animal Origin. *J. Nutr.* **1972**, *102*, 653-660, doi:10.1093/jn/102.5.653.
154. Edwards, H.M.; Baker, D.H. Zinc bioavailability in soybean meal. *J. Anim. Sci.* **2000**, *78*, 1017-1021, doi:10.2527/2000.7841017x.
155. Edwards, H.M., 3rd; Boling, S.D.; Emmert, J.L.; Baker, D.H. Bioavailability of zinc in two zinc sulfate by-products of the galvanizing industry. *Poult. Sci.* **1998**, *77*, 1546-1549, doi:10.1093/ps/77.10.1546.
156. Edwards, H.M., Jr. The availability to chicks of zinc in various compounds and ores. *J. Nutr.* **1959**, *69*, 306-308, doi:10.1093/jn/69.3.306.
157. Aoyagi, S.; Hiney, K.M.; Baker, D.H. Estimates of zinc and iron bioavailability in pork liver and the effect of sex of pig on the bioavailability of copper in pork liver fed to male and female chicks. *J. Anim. Sci.* **1995**, *73*, 793-798, doi:10.2527/1995.733793x.
158. O'Dell, B.L.; Savage, J.E. Effect of phytic acid on zinc availability. *Proc. Soc. Exp. Biol. Med.* **1960**, *103*, 304-306, doi:10.3181/00379727-103-25498.
159. Edwards, H.M.; Baker, D.H. Bioavailability of zinc in several sources of zinc oxide, zinc sulfate, and zinc metal. *J. Anim. Sci.* **1999**, *77*, 2730-2735, doi:10.2527/1999.77102730x.

160. Cao, J.; Henry, P.R.; Guo, R.; Holwerda, R.A.; Toth, J.P.; Littell, R.C.; Miles, R.D.; Ammerman, C.B. Chemical characteristics and relative bioavailability of supplemental organic zinc sources for poultry and ruminants. *J. Anim. Sci.* **2000**, *78*, 2039–2054, doi:10.2527/2000.7882039x.
161. Pensack, J.; Henson, J.; Bogdonoff, P. The effects of calcium and phosphorus on the zinc requirements of growing chickens. In Proceedings of Poultry Science; pp. 1232–1233.
162. Roberson, R.H.; Schaible, P.J. The Availability to the Chick of Zinc as the Sulfate, Oxide or Carbonate. *Poult. Sci.* **1960a**, *39*, 835–837, doi:https://doi.org/10.3382/ps.0390835.
163. Roberson, R.H.; Schaible, P.J. The Tolerance of Growing Chicks for High Levels of Different Forms of Zinc. *Poult. Sci.* **1960b**, *39*, 893–896, doi:https://doi.org/10.3382/ps.0390893.
164. Roberson, R.H.; Schaible, P.J. The Zinc Requirement of the Chick. *Poult. Sci.* **1958**, *37*, 1321–1323, doi:https://doi.org/10.3382/ps.0371321.
165. Yu, L.; Yi, J.; Chen, Y.; Huang, M.; Zhu, N. Relative Bioavailability of Broiler Chickens Fed with Zinc Hydroxychloride and Sulfate Sources for Corn-Soybean Meal. *Biol. Trace Elem. Res.* **2021**, *200*, 1–12, doi:10.1007/s12011-021-03013-5.
166. Hill, D.A.; Peo, E.R., Jr.; Lewis, A.J. Effect of zinc source and picolinic acid on 65Zn uptake in an in vitro continuous-flow perfusion system for pig and poultry intestinal segments. *J. Nutr.* **1987**, *117*, 1704–1707, doi:10.1093/jn/117.10.1704.
167. Pimentel, J.L.; Cook, M.E.; Greger, J.L. Research Note: Bioavailability of Zinc-Methionine for Chicks. *Poult. Sci.* **1991**, *70*, 1637–1639.
168. Liu, S.; Li, S.; Lu, L.; Xie, J.; Zhang, L.; Wang, R.; Luo, X. The effectiveness of zinc proteinate for chicks fed a conventional corn-soybean meal diet. *J. Appl. Poult. Res.* **2013**, *22*, 396–403, doi:10.3382/japr.2012-00564.
169. Li, W.-x.; Ma, X.-y.; Lu, L.; Zhang, L.-y.; Luo, X.-g. Relative bioavailability of tribasic zinc sulfate for broilers fed a conventional corn-soybean meal diet. *J. Integ. Agric.* **2015**, *14*, 2042–2049, doi:https://doi.org/10.1016/S2095-3119(15)61033-4.
170. Świątkiewicz, S.; Koreleski, J.; Zhong, D.Q. The bioavailability of zinc from inorganic and organic sources in broiler chickens as affected by addition of phytase. *J. Anim. Feed Sci.* **2001**, *10*, 317–328, doi:10.22358/jafs/67987/2001.
171. Star, L.; van der Klis, J.D.; Rapp, C.; Ward, T.L. Bioavailability of organic and inorganic zinc sources in male broilers. *Poult. Sci.* **2012**, *91*, 3115–3120, doi:10.3382/ps.2012-02314.
172. Huang, Y.L.; Lu, L.; Li, S.F.; Luo, X.G.; Liu, B. Relative bioavailabilities of organic zinc sources with different chelation strengths for broilers fed a conventional corn-soybean meal diet1. *J. Anim. Sci.* **2009**, *87*, 2038–2046, doi:10.2527/jas.2008-1212.
173. Huang, Y.; Lu, L.; Xie, J.; Li, S.; Li, X.; Liu, S.; Zhang, L.; Xi, L.; Luo, X. Relative bioavailabilities of organic zinc sources with different chelation strengths for broilers fed diets with low or high phytate content. *Anim. Feed Sci. Technol.* **2013**, *179*, 144–148.
174. Sandoval, M.; Henry, P.R.; Ammerman, C.B.; Miles, R.D.; Littell, R.C. Relative bioavailability of supplemental inorganic zinc sources for chicks. *J. Anim. Sci.* **1997**, *75*, 3195–3205, doi:10.2527/1997.75123195x.
175. Batal, A.B.; Parr, T.M.; Baker, D.H. Zinc bioavailability in tetrabasic zinc chloride and the dietary zinc requirement of young chicks fed a soy concentrate diet. *Poult. Sci.* **2001**, *80*, 87–90, doi:10.1093/ps/80.1.87.
176. Wedekind, K.J.; Baker, D.H. Zinc bioavailability in feed-grade sources of zinc. *J. Anim. Sci.* **1990**, *68*, 684–689, doi:10.2527/1990.683684x.
177. Wedekind, K.J. The bioavailability of zinc-methionine relative to zinc sulfate is affected by calcium level. *Poult. Sci.* **1994**, *73*, 114.

178. Cao, J.; Henry, P.R.; Davis, S.R.; Cousins, R.J.; Miles, R.D.; Littell, R.C.; Ammerman, C.B. Relative bioavailability of organic zinc sources based on tissue zinc and metallothionein in chicks fed conventional dietary zinc concentrations. *Anim. Feed Sci. Tech.* **2002**, *101*, 161–170, doi:[https://doi.org/10.1016/S0377-8401\(02\)00051-2](https://doi.org/10.1016/S0377-8401(02)00051-2).
179. Suo, H.; Lu, L.; Zhang, L.; Zhang, X.; Li, H.; Lu, Y.; Luo, X. Relative bioavailability of zinc-methionine chelate for broilers fed a conventional corn-soybean meal diet. *Biol. Trace Elem. Res.* **2015**, *165*, 206–213, doi:10.1007/s12011-015-0252-4.
180. Wedekind, K.J.; Hortin, A.E.; Baker, D.H. Methodology for assessing zinc bioavailability: efficacy estimates for zinc-methionine, zinc sulfate, and zinc oxide. *J. Anim. Sci.* **1992**, *70*, 178–187, doi:10.2527/1992.701178x.
181. Richards, J.; Fisher, P.; Evans, J.; Wedekind, K. Greater bioavailability of chelated compared with inorganic zinc in broiler chicks in the presence or absence of elevated calcium and phosphorus. *Open Access Anim. Physiol.* **2015**, *7*, 97–110, doi:10.2147/oaap.s83845.
182. Sahraei, M.; Janmmohamadi, H.; Taghizadeh, A.; Ali Moghadam, G.; Abbas Rafat, S. Estimation of the Relative Bioavailability of Several Zinc Sources for Broilers Fed a Conventional Corn-Soybean Meal Diet. *J. Poult. Sci.* **2013**, *50*, 53–59, doi:10.2141/jpsa.0120022.
183. Brooks, M.A.; Grimes, J.L.; Lloyd, K.E.; Verissimo, S.; Spears, J.W. Bioavailability in chicks of zinc from zinc propionate. *J. Appl. Poult. Res.* **2013**, *22*, 153–159, doi:<https://doi.org/10.3382/japr.2012-00525>.
184. Ao, T.; Pierce, J.L.; Power, R.F.G.; Dawson, K.A.; Pescatore, A.J.; Cantor, A.H.; Ford, M.J. Evaluation of Bioplex Zn® as an organic zinc source for chicks. *Int. J. Poult. Sci.* **2006**, *5*, 808–811.
185. Vohra, P.; Kratzer, F.H. Influence of various phosphates and other complexing agents on the availability of zinc for turkey poults. *J. Nutr.* **1966**, *89*, 106–112, doi:10.1093/jn/89.1.106.
186. Sullivan, T.W. The availability of zinc in various compounds to broad breasted bronze pouhs. *Poult. Sci.* **1961**, *40*, 340.
187. Kratzer, F.H.; Allred, J.B.; Davis, P.N.; Marshall, B.J.; Vohra, P. The effect of autoclaving soybean protein and the addition of ethylenediaminetetracetic acid on the biological availability of dietary zinc for turkey poults. *J. Nutr.* **1959**, *68*, 313–322, doi:10.1093/jn/68.2.313.
188. Jones, A.O.L.; Fox, M.R.S.; Fry, B.E., Jr. In vitro assessment of zinc binding to protein foods as a potential index of zinc bioavailability Comparison of in vitro and in vivo data. *J. Agric. Food. Chem.* **1985**, *33*, 1123–1128.
189. Sandoval, M.; Henry, P.R.; Littell, R.C.; Cousins, R.J.; Ammerman, C.B. Estimation of the relative bioavailability of zinc from inorganic zinc sources for sheep. *Anim. Feed Sci. Tech.* **1997**, *66*, 223–235, doi:[https://doi.org/10.1016/S0377-8401\(96\)01103-0](https://doi.org/10.1016/S0377-8401(96)01103-0).
190. Ho, S.K.; Hidroglou, M. Effects of dietary chelated and sequestered zinc and zinc sulfate on growing lambs fed a purified diet. *Can. J. Anim. Sci.* **1977**, *57*, 93–99, doi:10.4141/cjas77-011.
191. Smith, B.L.; Embling, P.P. The influence of chemical form of zinc on the effects of toxic intraruminal doses of zinc to sheep. *J. Appl. Toxicol.* **1984**, *4*, 92–96, doi:10.1002/jat.2550040207.
192. Grešáková, L.; Tokarčíková, K.; Čobanová, K. Bioavailability of Dietary Zinc Sources and Their Effect on Mineral and Antioxidant Status in Lambs. *Agriculture* **2021**, *11*, 1093.
193. Rojas, L.X.; McDowell, L.R.; Cousins, R.J.; Martin, F.G.; Wilkinson, N.S.; Johnson, A.B.; Velasquez, J.B. Relative bioavailability of two organic and two inorganic zinc sources fed to sheep. *J. Anim. Sci.* **1995**, *73*, 1202–1207, doi:10.2527/1995.7341202x.
194. Swinkels, J.W.G.M.; Kornegay, E.T.; Zhou, W.; Lindemann, M.D.; Webb, K.E., Jr.; Verstegen, M.W.A. Effectiveness of a zinc amino acid chelate and zinc sulfate in restoring serum and soft Tissue zinc concentrations when fed to zinc-depleted pigs. *J. Anim. Sci.* **1996**, *74*, 2420–2430, doi:10.2527/1996.74102420x.
195. Hap, I.; Zeman, L. The effect of the use of various zinc sources on zinc availability in piglets. *Zivocisma-Vyroba* **1994**, *39*, 343–349.

- 
196. Zhang, B.; Guo, Y. Beneficial effects of tetrabasic zinc chloride for weanling piglets and the bioavailability of zinc in tetrabasic form relative to ZnO. *Anim. Feed Sci. Technol.* **2007**, *135*, 75-85, doi:<https://doi.org/10.1016/j.anifeedsci.2006.06.006>.
197. Hahn, J.D.; Baker, D.H. Growth and plasma zinc responses of young pigs fed pharmacologic levels of zinc. *J. Anim. Sci.* **1993**, *71*, 3020-3024, doi:10.2527/1993.71113020x.
198. Cheng, J.; Kornegay, E.T.; Schell, T. Influence of dietary lysine on the utilization of zinc from zinc sulfate and a zinc-lysine complex by young pigs. *J. Anim. Sci.* **1998**, *76*, 1064-1074, doi:10.2527/1998.7641064x.
199. Schell, T.C.; Kornegay, E.T. Zinc concentration in tissues and performance of weanling pigs fed pharmacological levels of zinc from ZnO, Zn-methionine, Zn-lysine, or ZnSO<sub>4</sub>. *J. Anim. Sci.* **1996**, *74*, 1584-1593, doi:10.2527/1996.7471584x.
200. Wedekind, K.J.; Lewis, A.J.; Giesemann, M.A.; Miller, P.S. Bioavailability of zinc from inorganic and organic sources for pigs fed corn-soybean meal diets. *J. Anim. Sci.* **1994**, *72*, 2681-2689, doi:10.2527/1994.72102681x.
201. Miller, E.R.; Ku, P.K.; Hitchcock, J.P.; Magee, W.T. Availability of Zinc from Metallic Zinc Dust for Young Swine. *J. Anim. Sci.* **1981**, *52*, 312-315, doi:10.2527/jas1981.522312x.
202. Hill, D.A.; Peo, E.R., Jr.; Lewis, A.J.; Crenshaw, J.D. Zinc-Amino Acid Complexes for Swine. *J. Anim. Sci.* **1986**, *63*, 121-130, doi:10.2527/jas1986.631121x.
203. Dourmad, J.-Y.; Guinotte, F.; Nys, Y. Bioavailability of two sources of zinc in weanling pigs. *Anim. Res.* **2002**, *51*, 315-326.
